# Supplementary material for: The LysE Superfamily of Transport Proteins Involved in Cell Physiology and Pathogenesis
Source: PubMed Central journal article supplement (PMC4608589; doi:10.1371/journal.pone.0137184), 2015-10-16

**Fig. S11A**  
LysE

Clustal

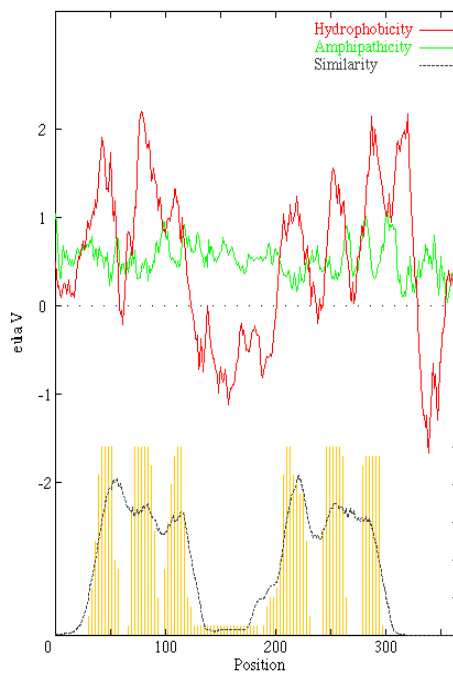

Mafft

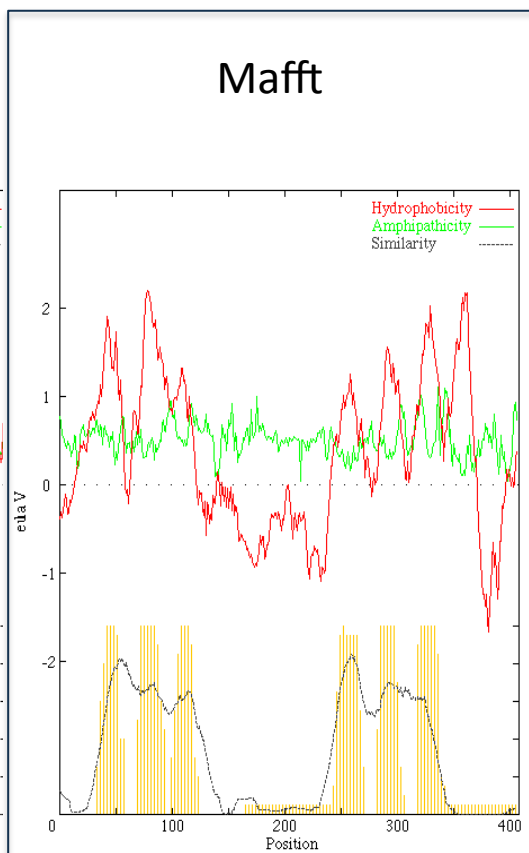

ProbCons

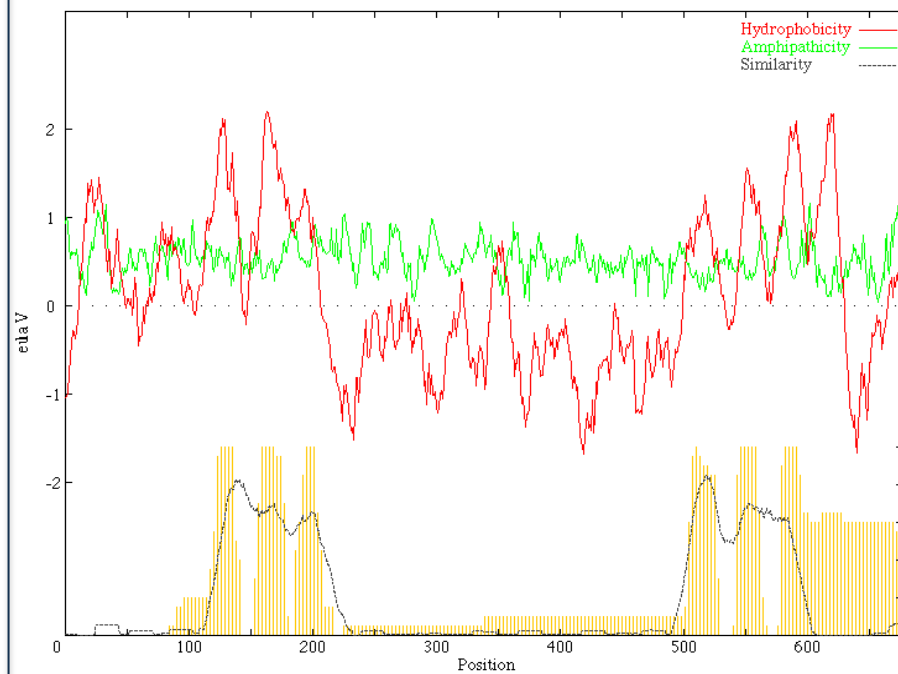

**Fig. S11B**

RhtB

Clustal

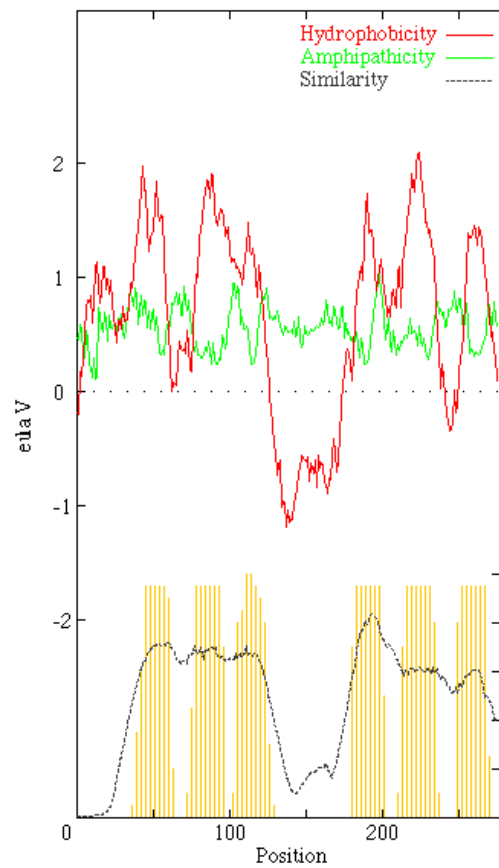

Mafft

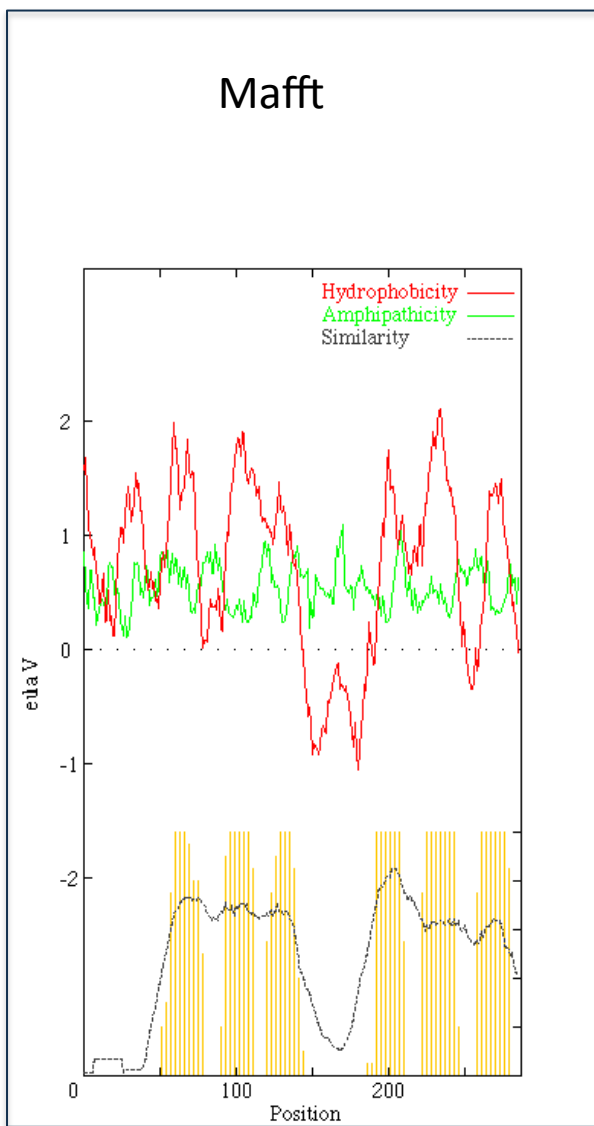

ProbCons

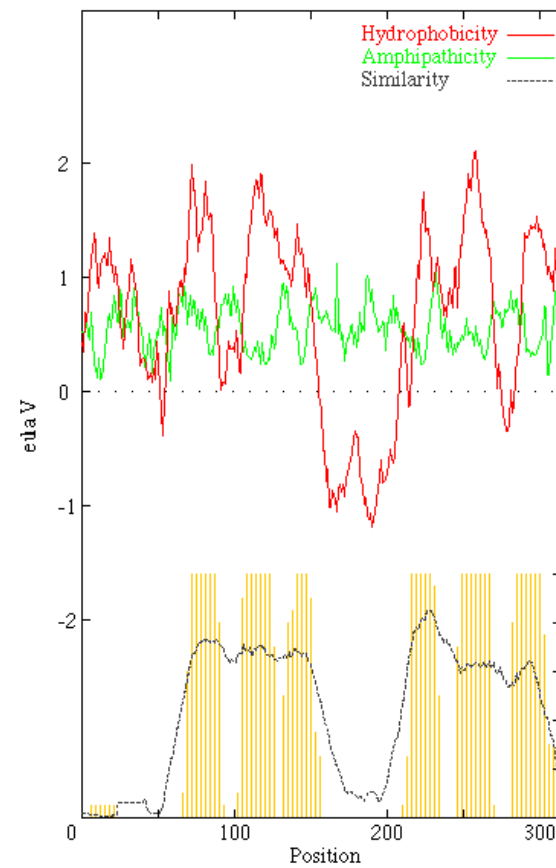

**Fig. S11C**  
CadD

Clustal

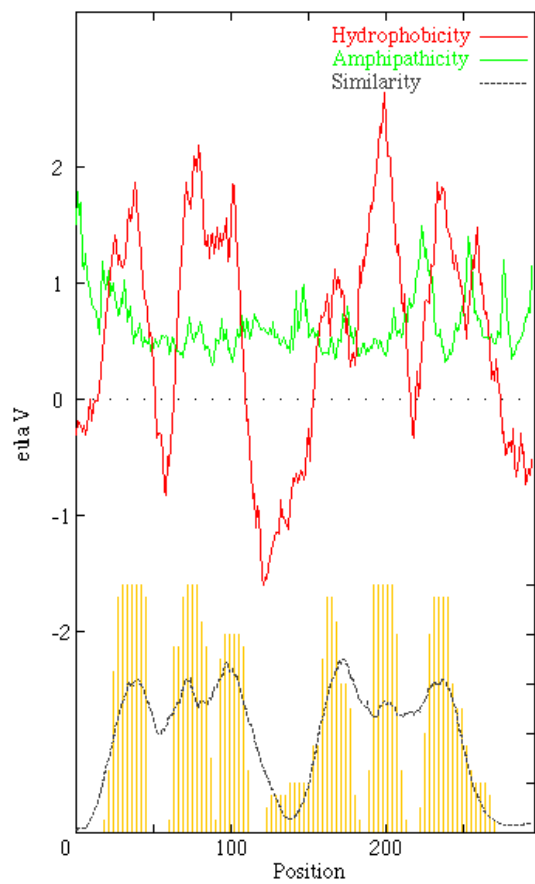

Mafft

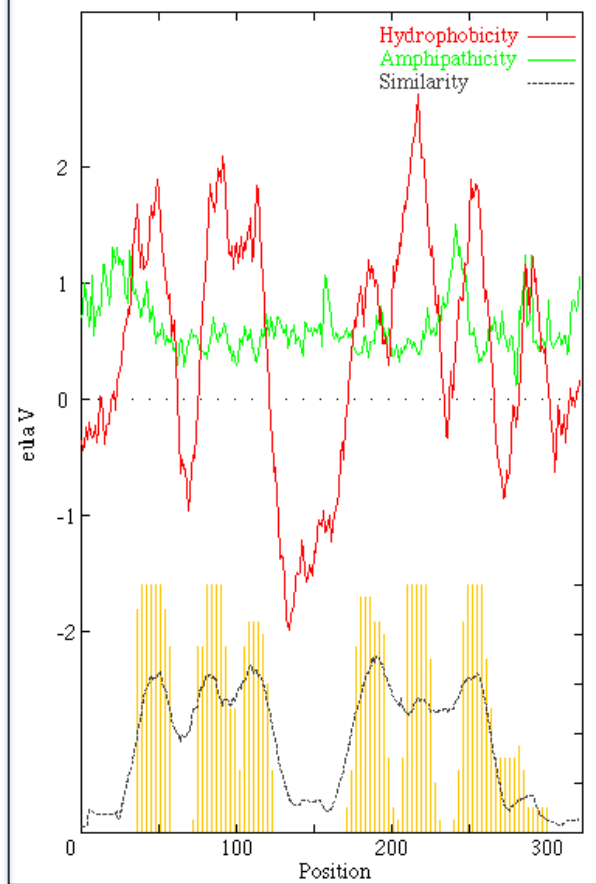

ProbCons

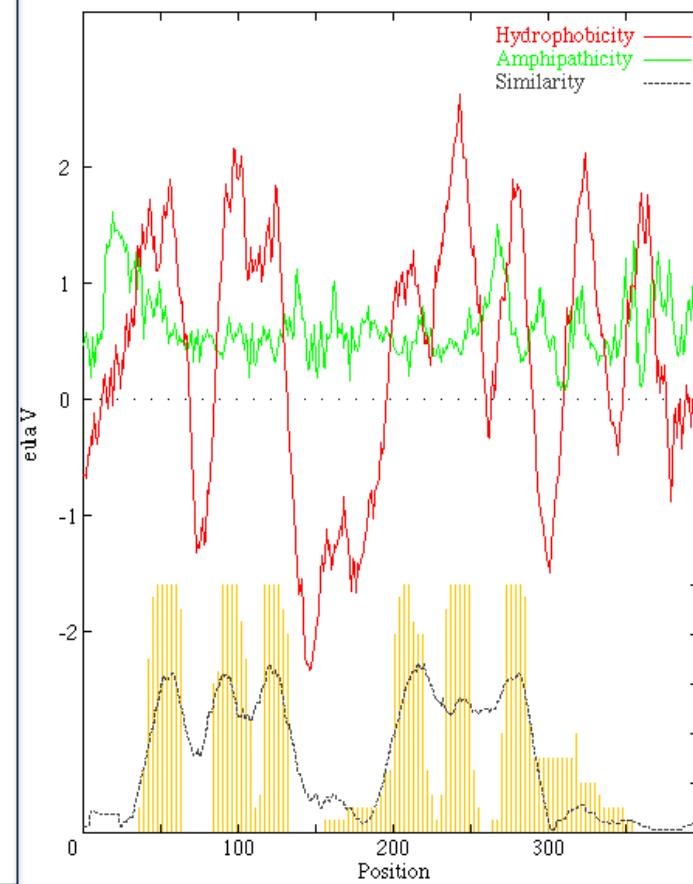

**Fig. S11D**  
**CaCA2**

Clustal

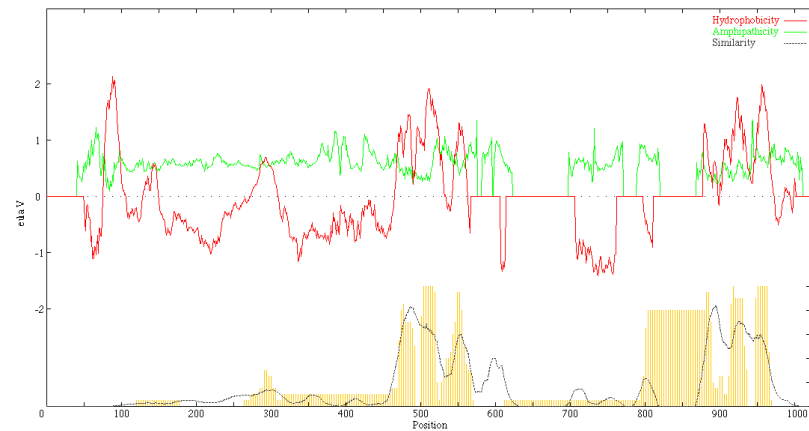

Mafft

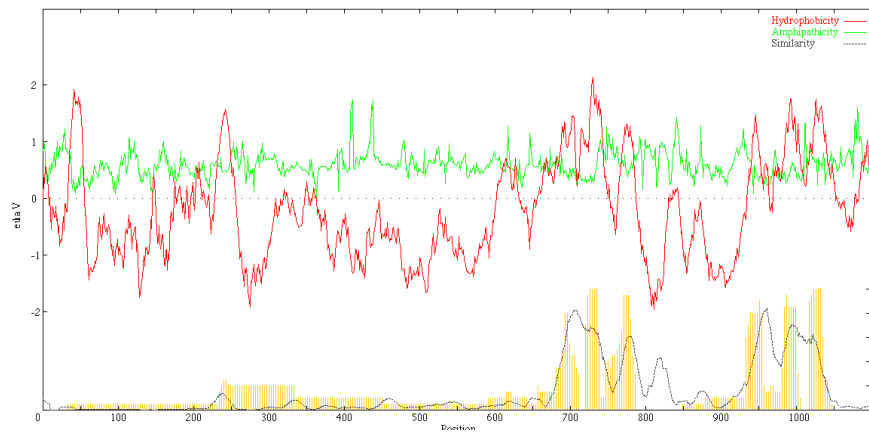

ProbCons

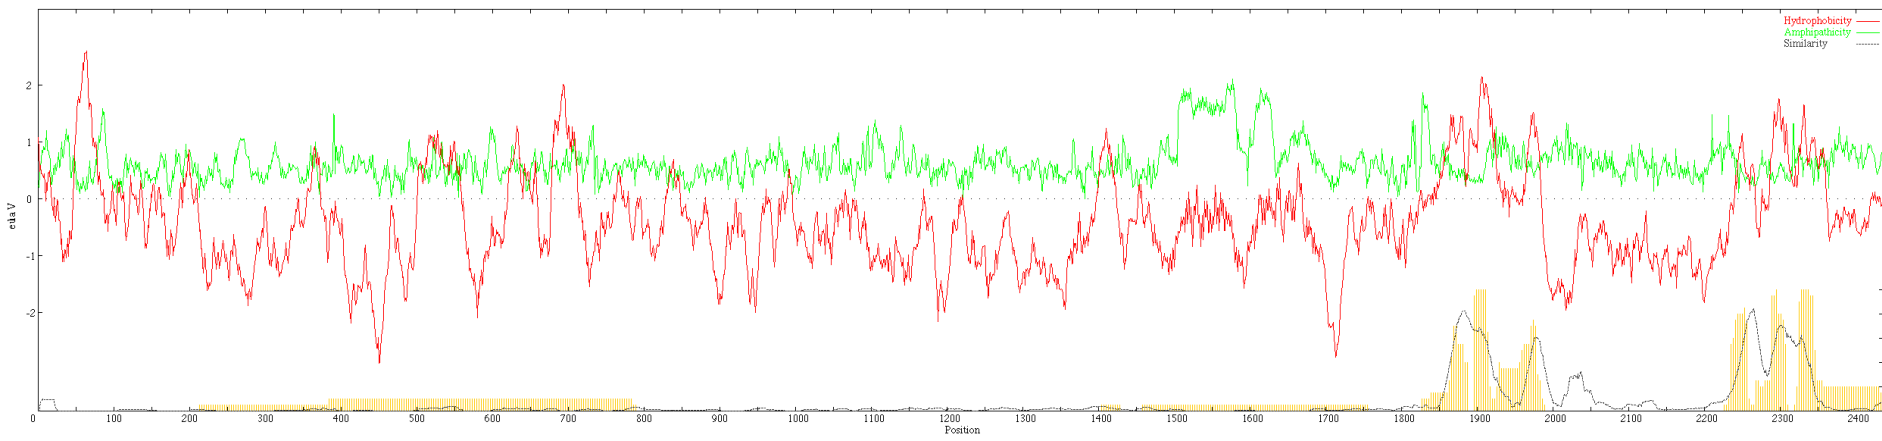

**Fig. S11E**

MntP

Clustal

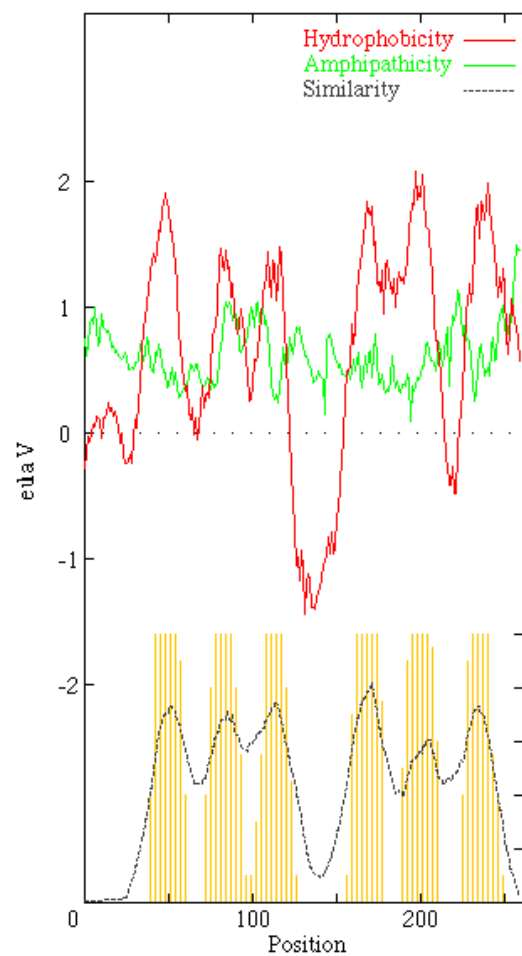

Mafft

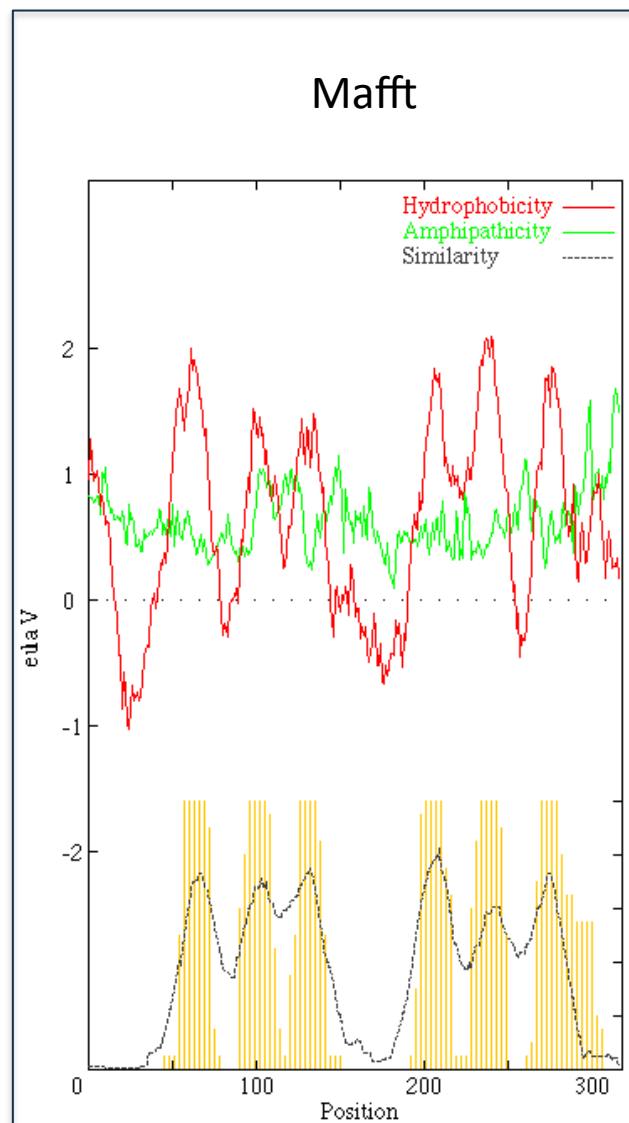

ProbCons

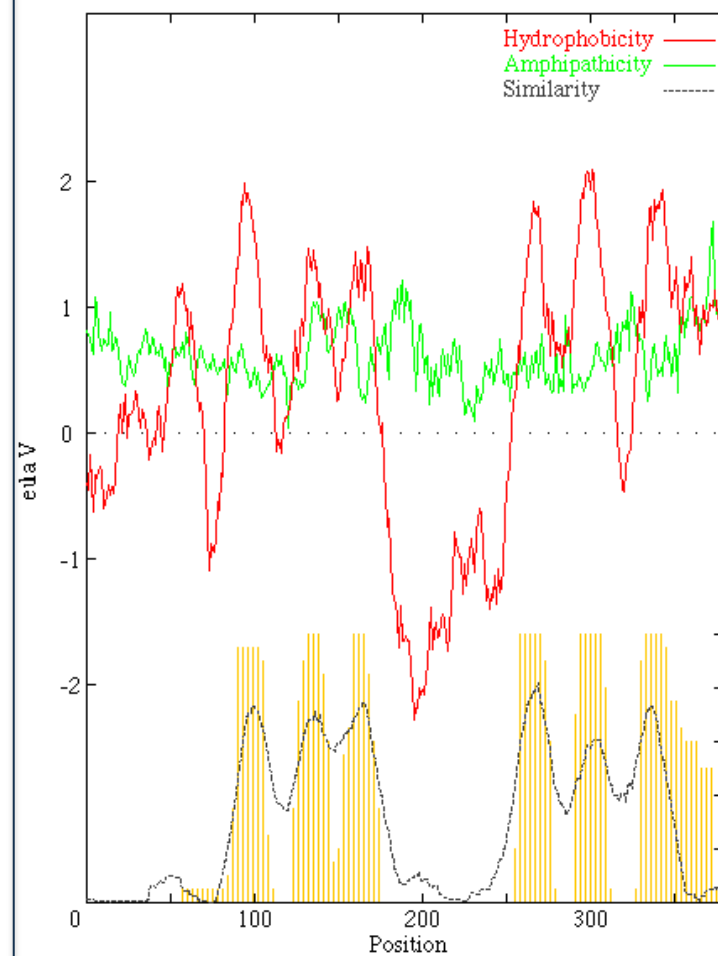

**Fig. S11F**

NAAT

Clustal

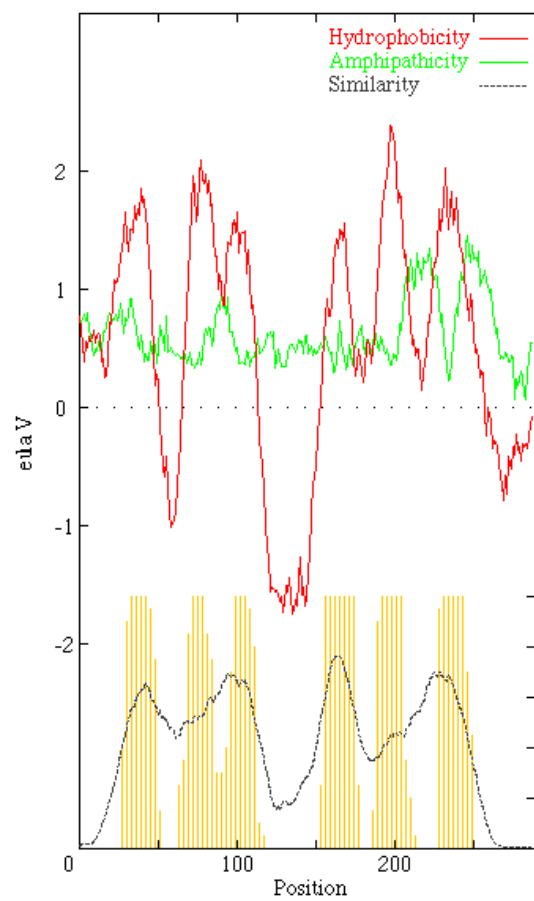

Mafft

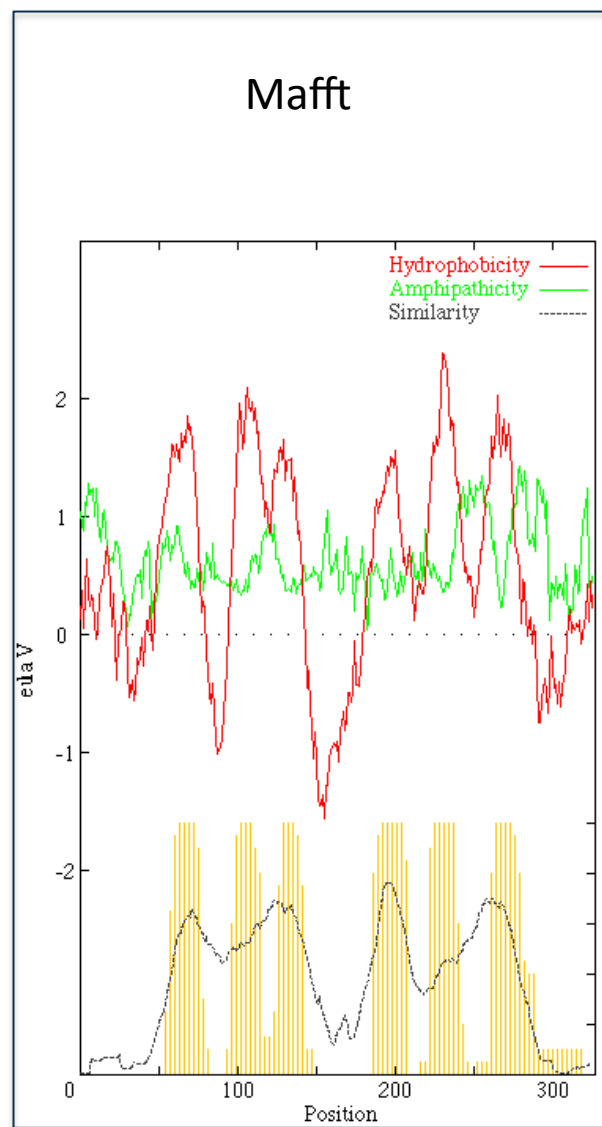

ProbCons

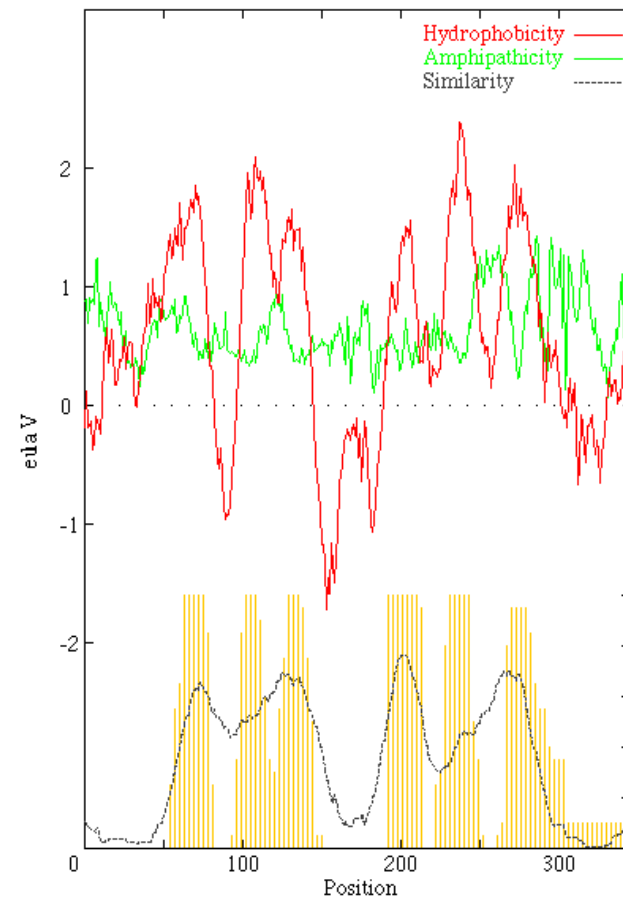

**Fig. S11G**  
NicO

Clustal

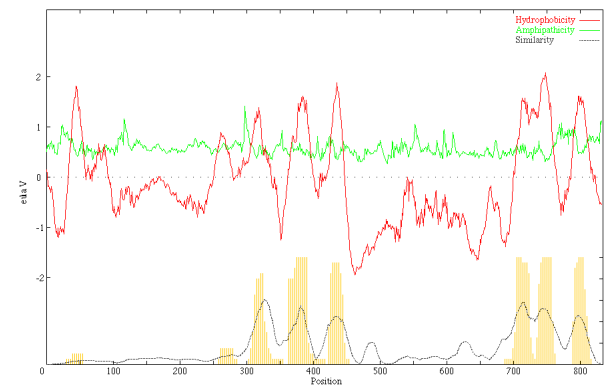

Mafft

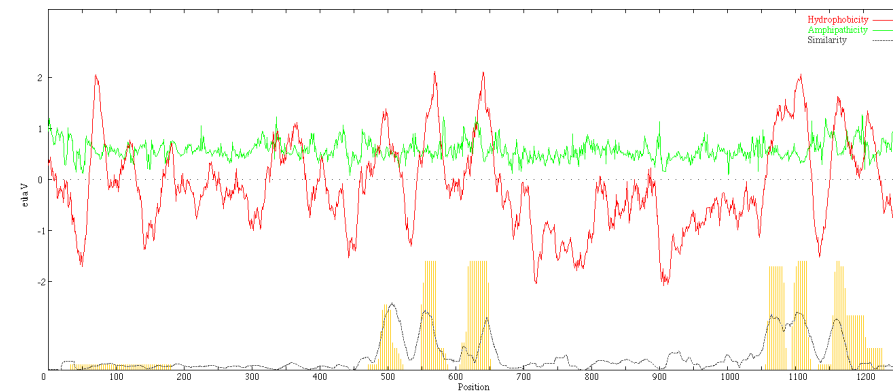

ProbCons

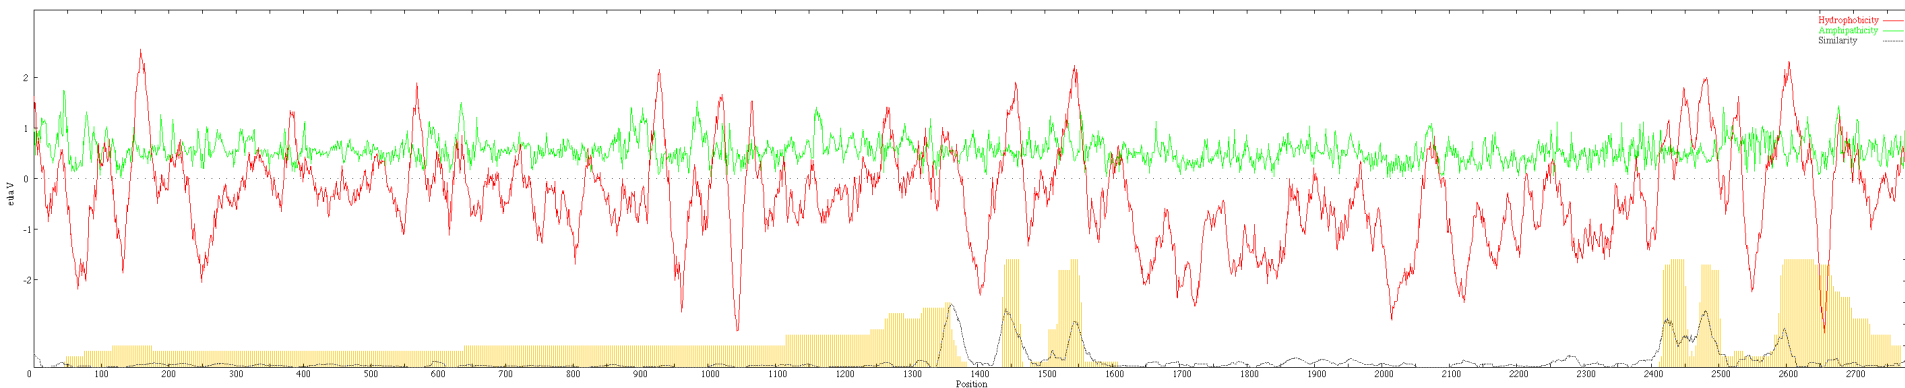

**Fig. S11H**  
GAP

Clustal

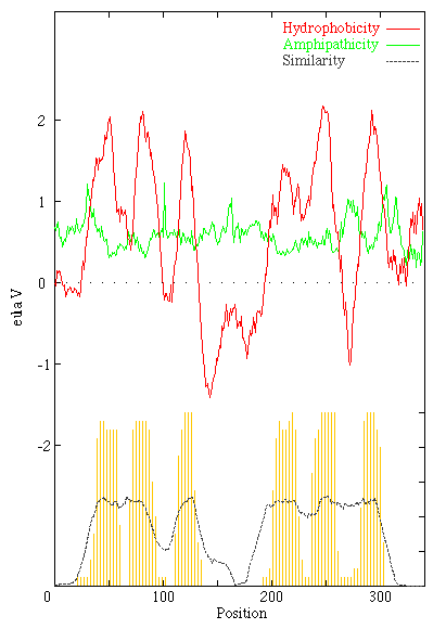

Mafft

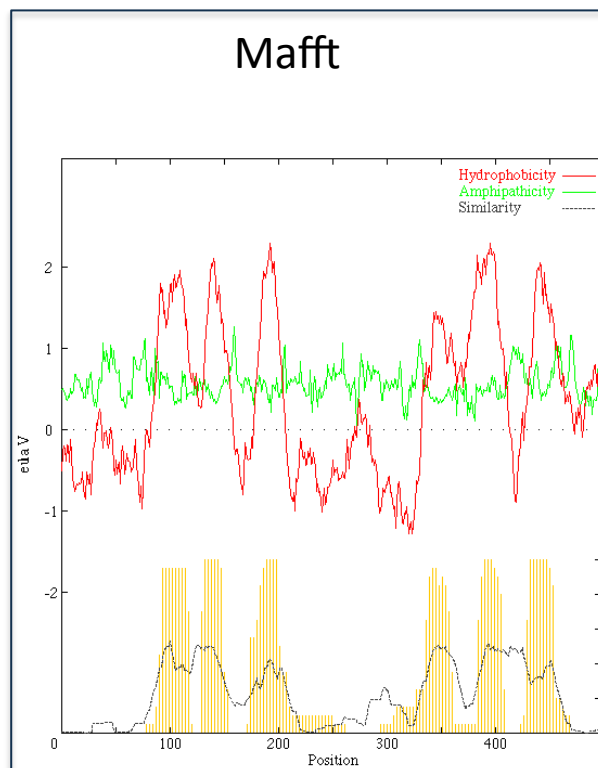

ProbCons

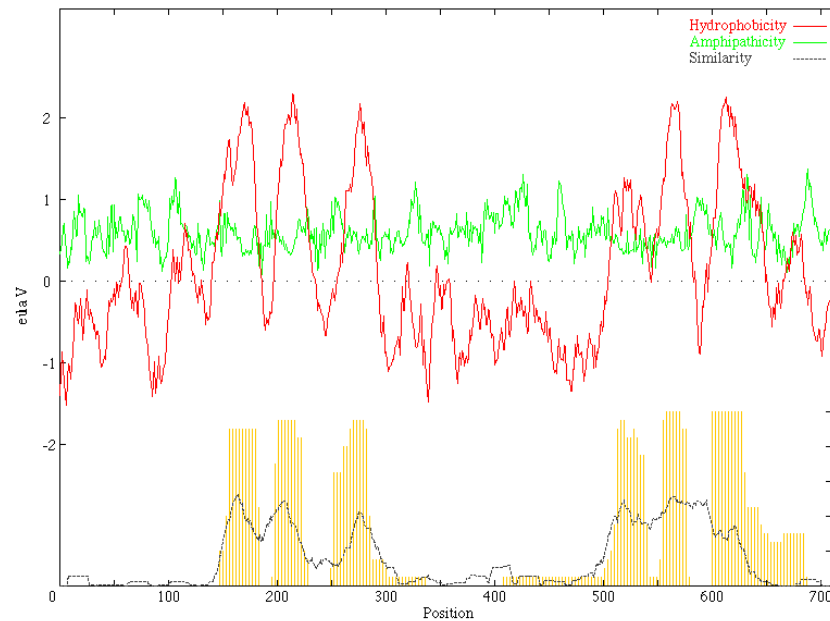



# Fig. S11I

DsbD

Clustal

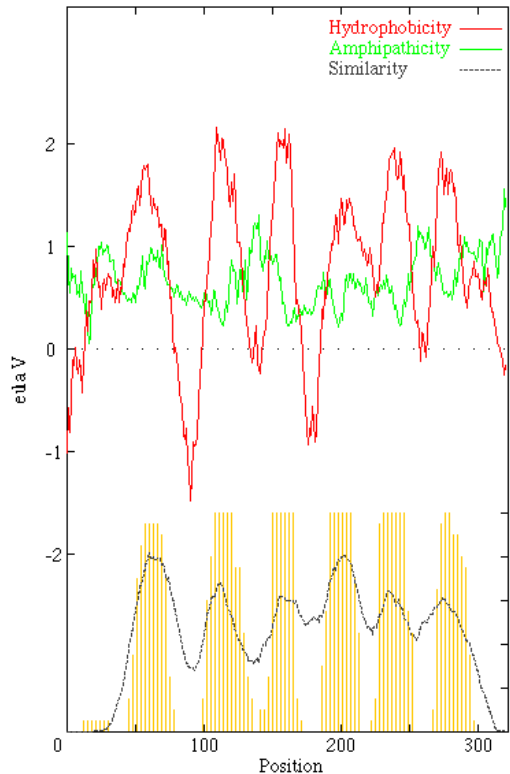

Mafft

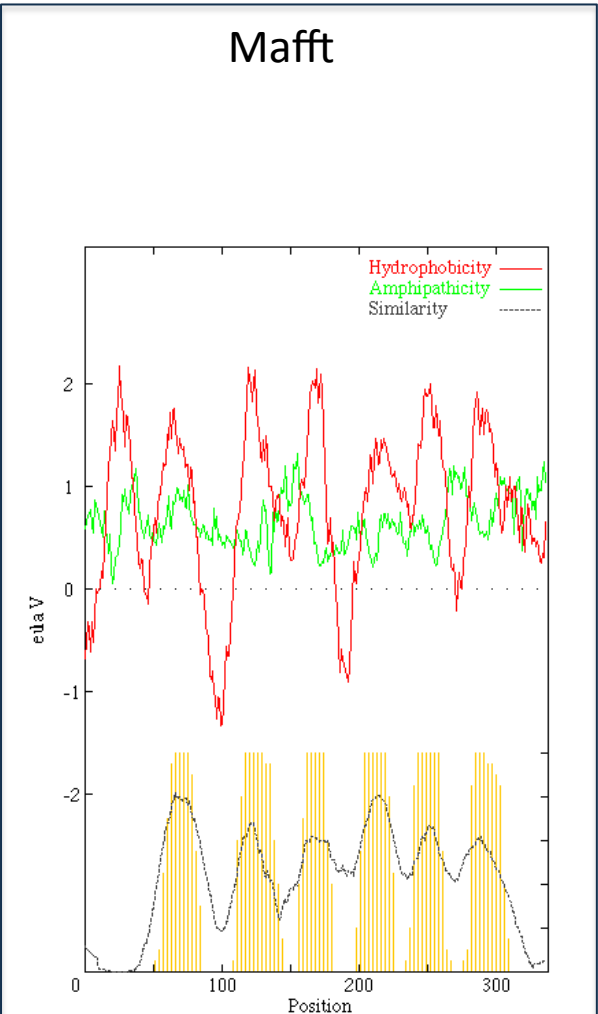

ProbCons

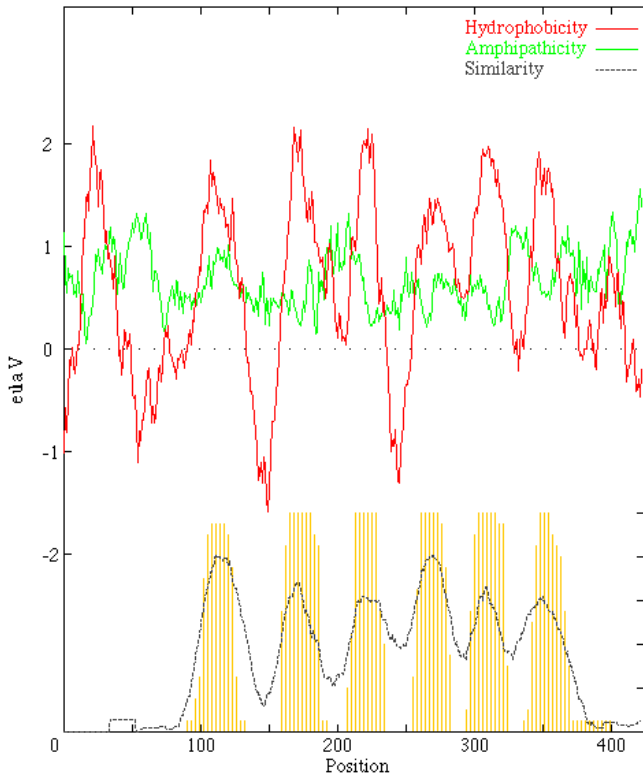

**Fig. S11J**

ILT

**Clustal**

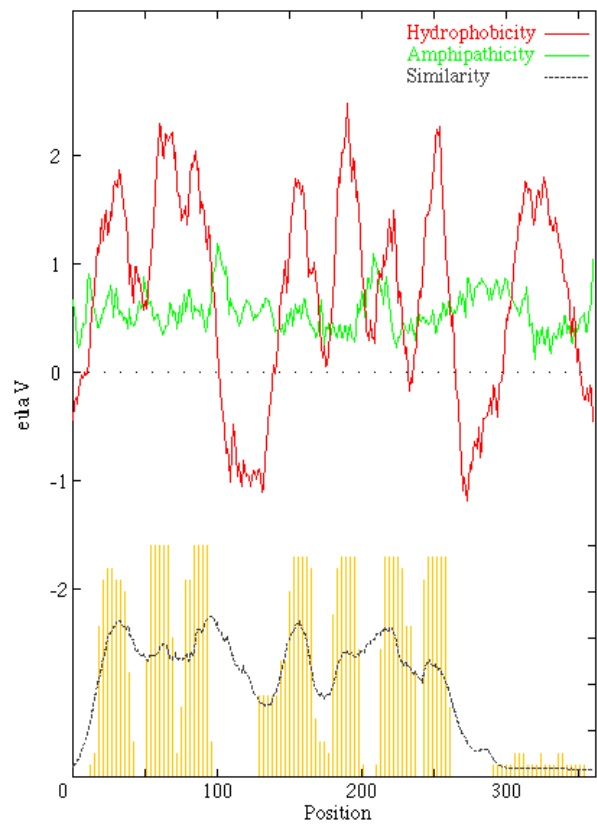

**Mafft**

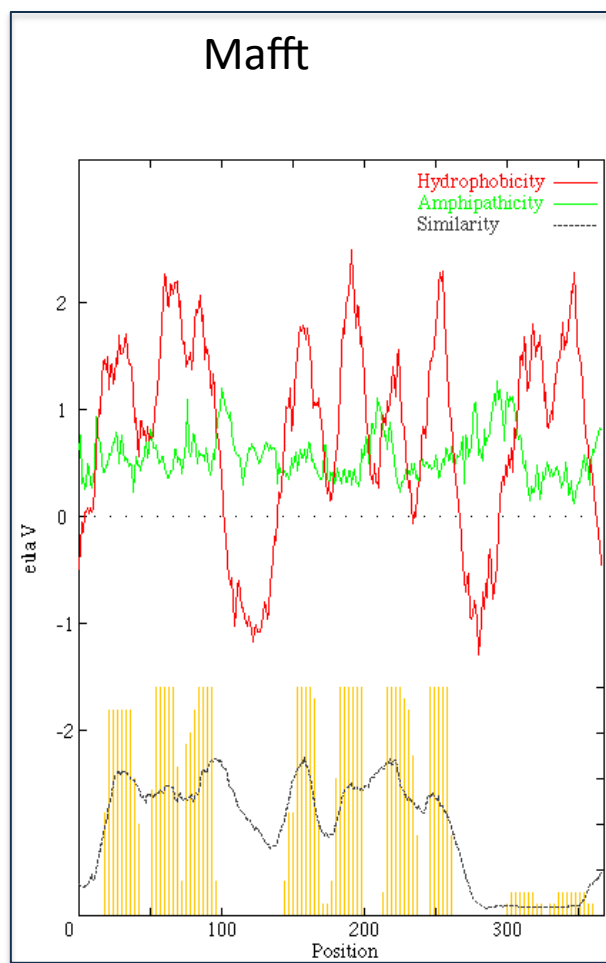

**ProbCons**

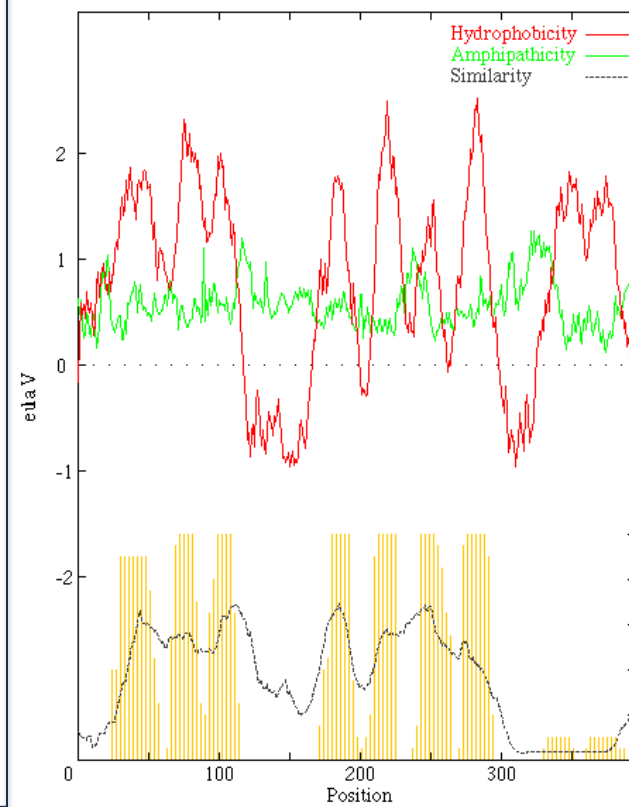

**Fig. S11K**

TerC

Clustal

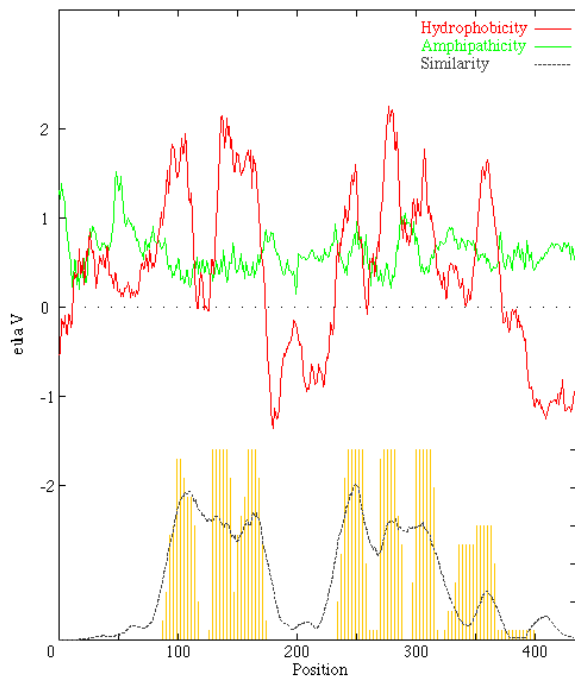

Mafft

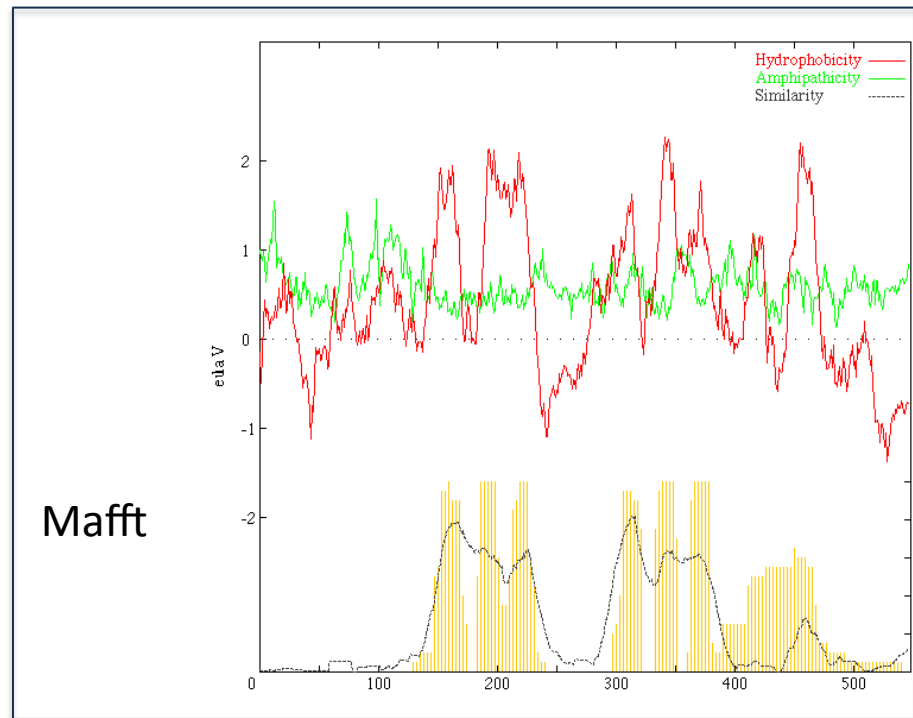

ProbCons

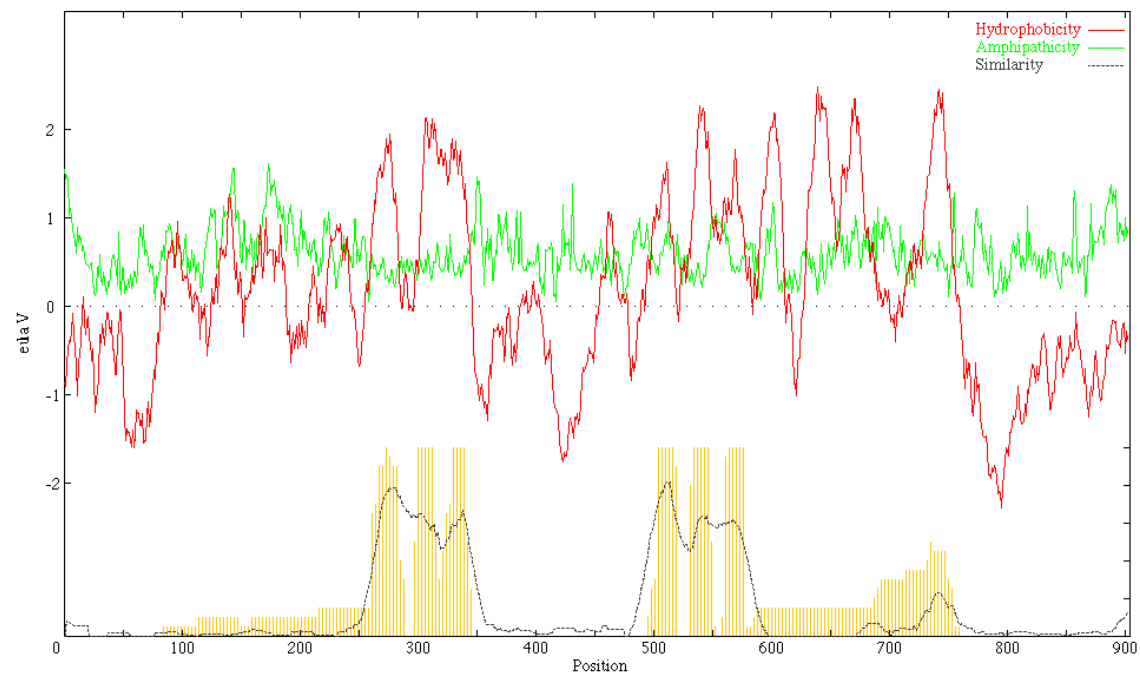

Supplement: pone.0137184.s011.pdf [file pone.0137184.s011.pdf]
