# Supplementary material for: The LysE Superfamily of Transport Proteins Involved in Cell Physiology and Pathogenesis
Source: PubMed Central journal article supplement (PMC4608589; doi:10.1371/journal.pone.0137184), 2015-10-16

Fig. 18A

LysE - Clustal

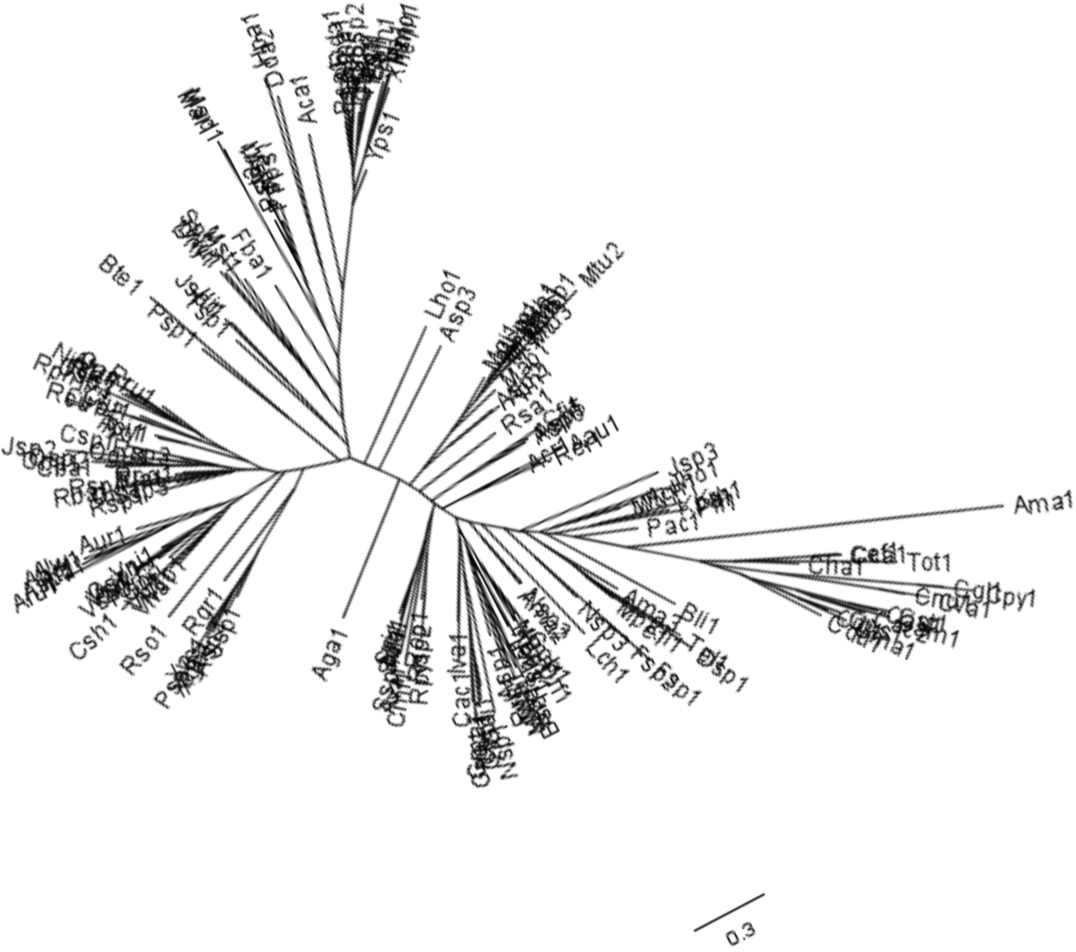

Fig. 18B

LysE - Mafft

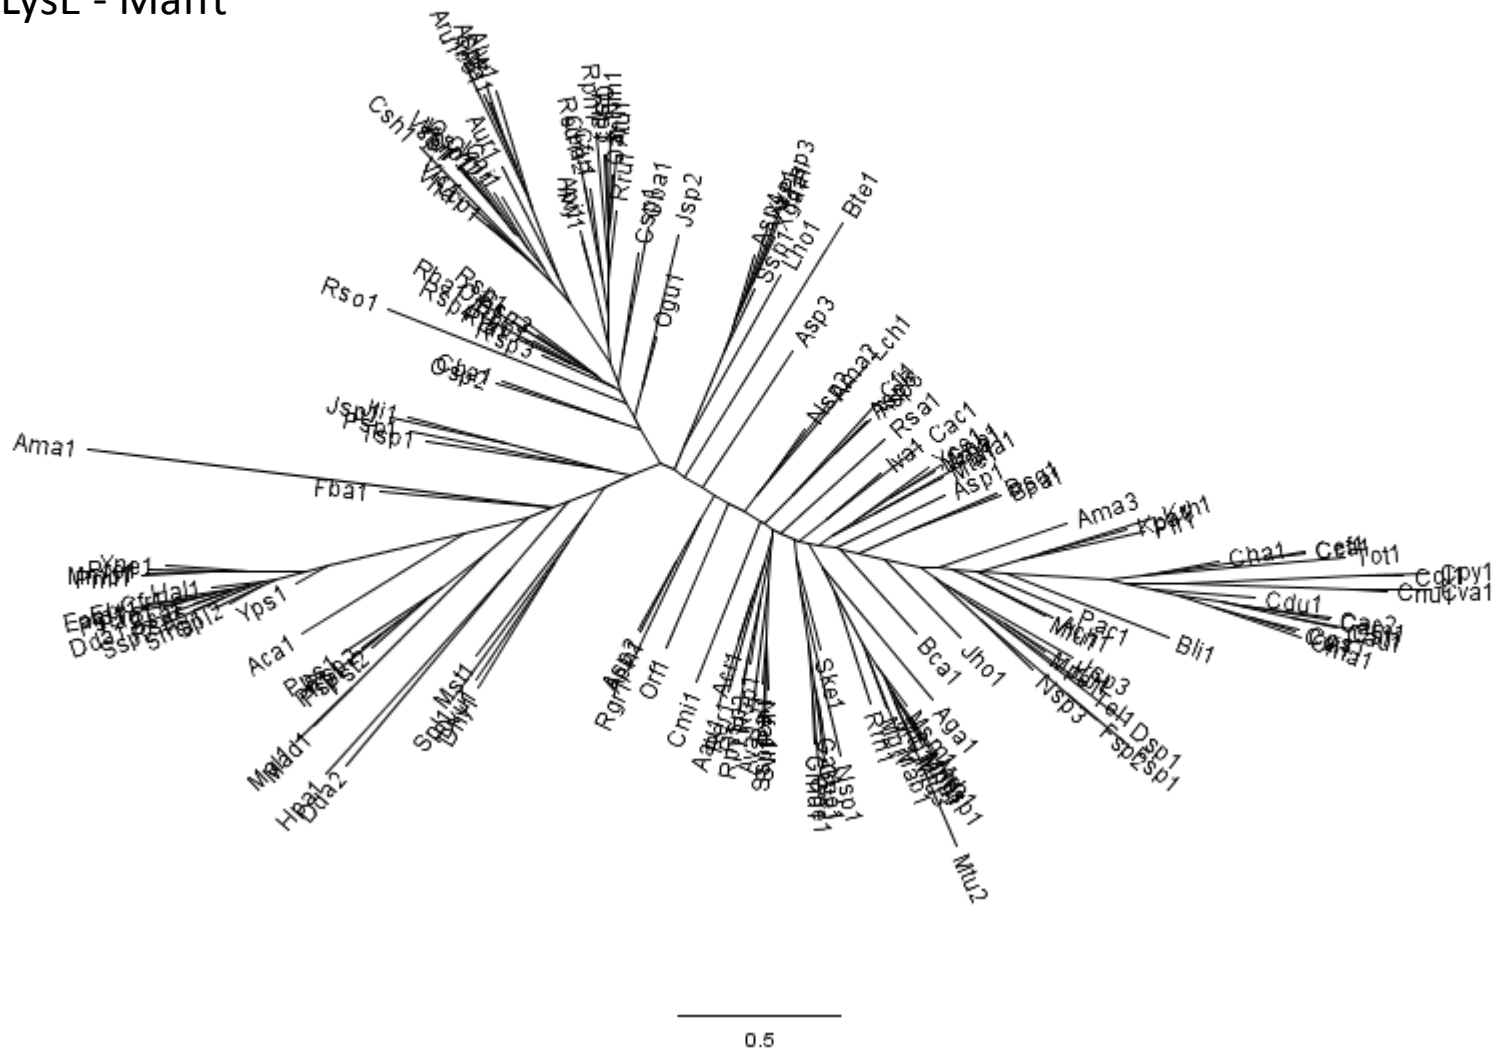

Fig. 18C

LysE - ProbCons

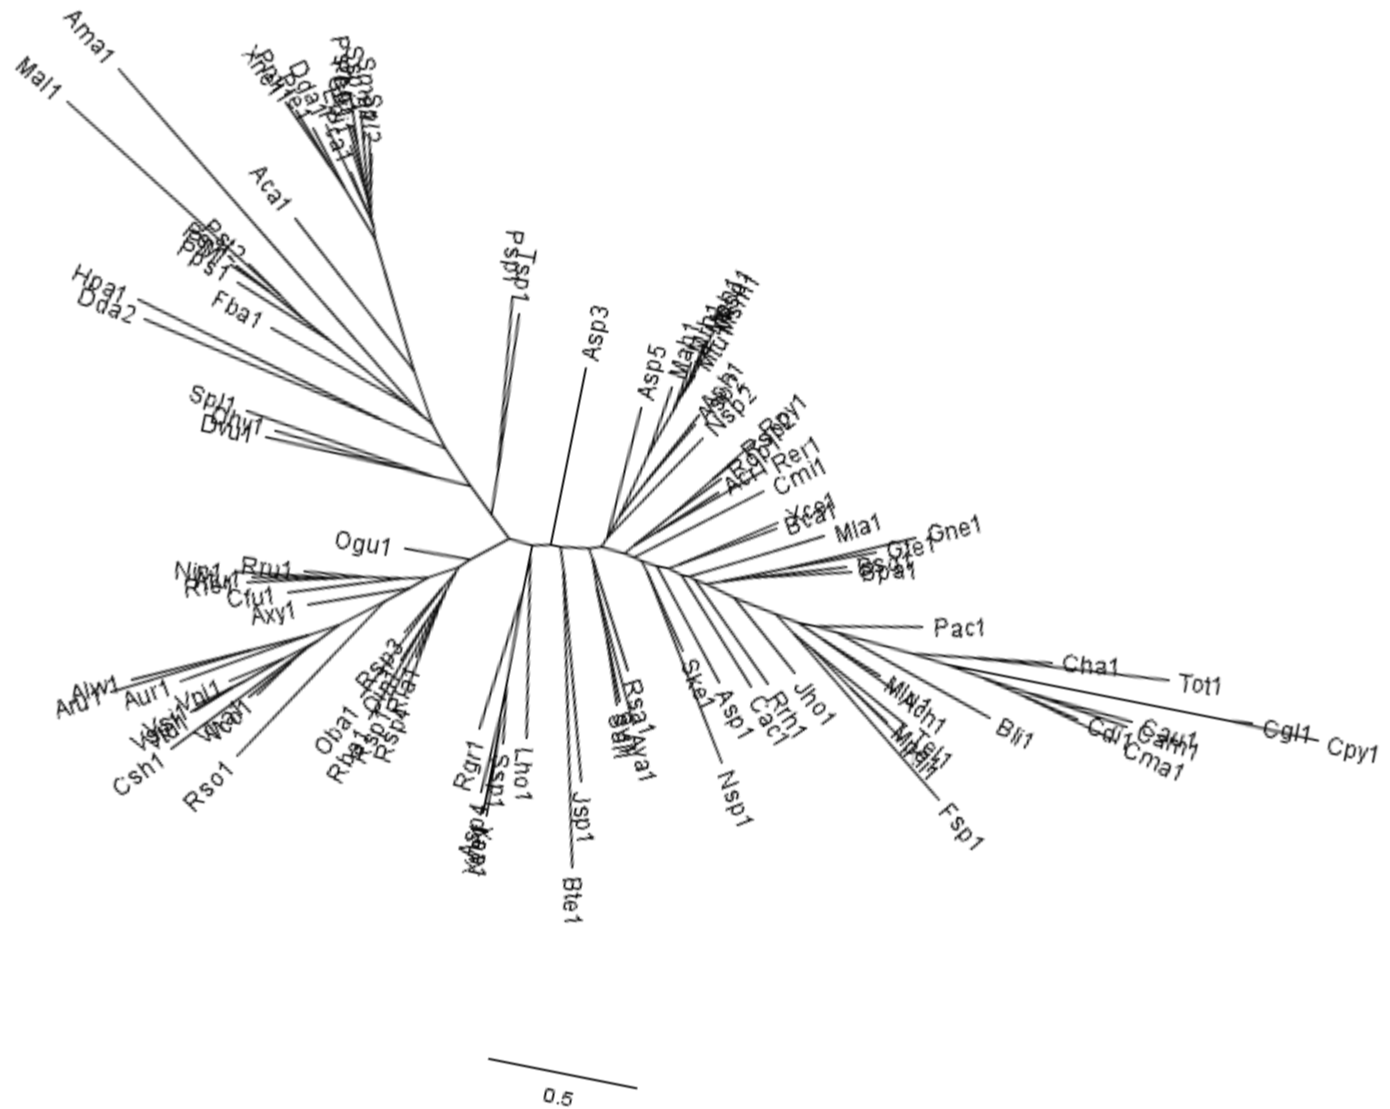





**Fig. 19C**

RhtB - ProbCons

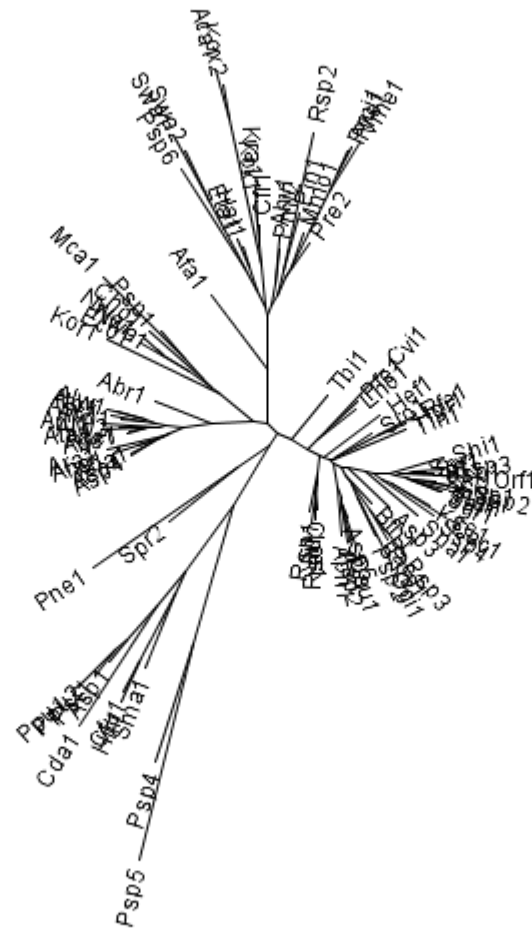

0.4



Fig. 20B

CadD - Mafft

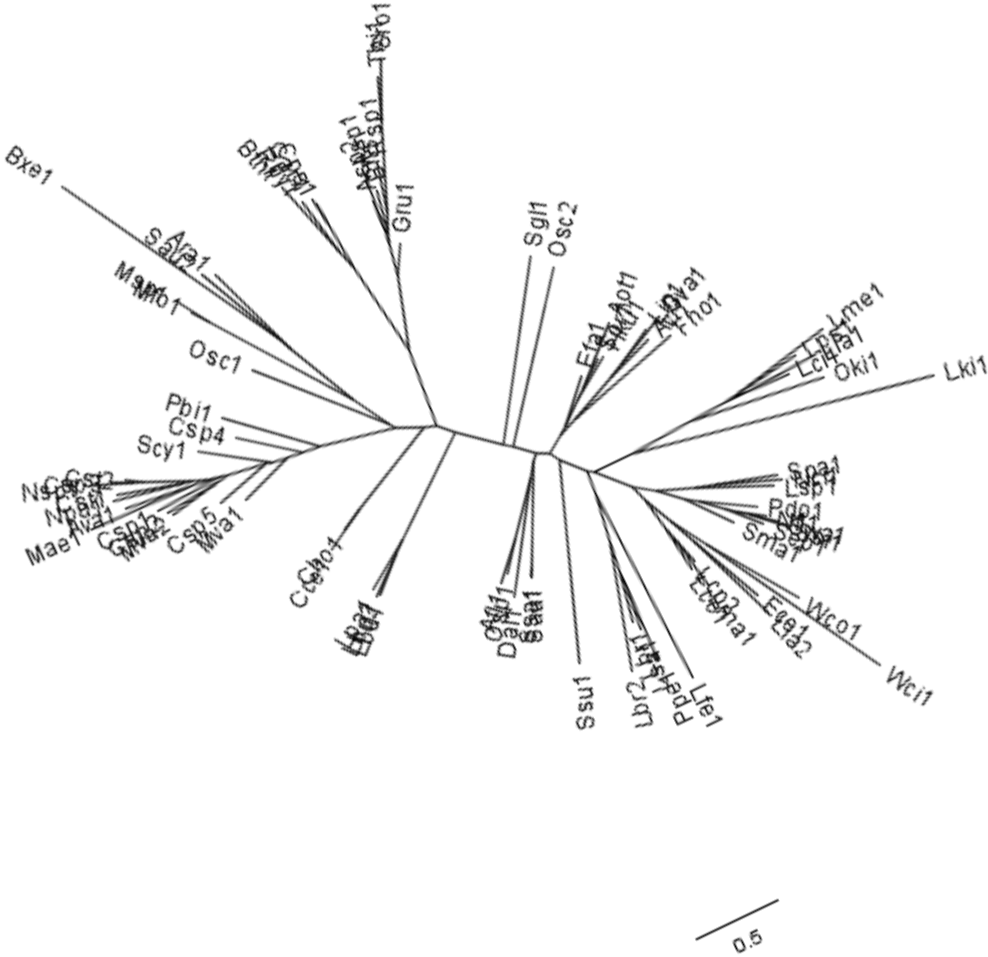



**Fig. 20C**

CadD - ProbCons

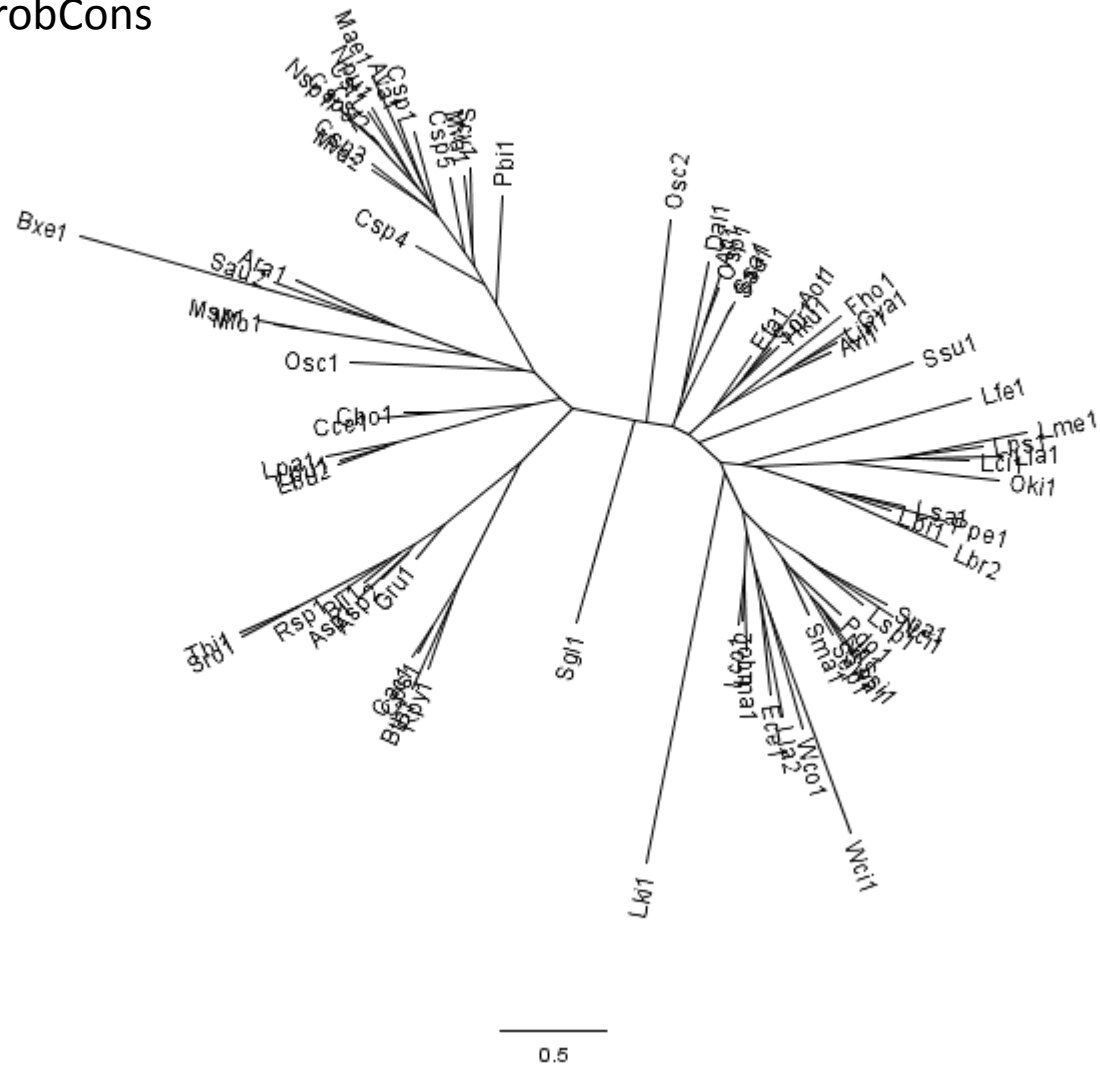

**Fig. 21A**

CaCA2 - Clustal

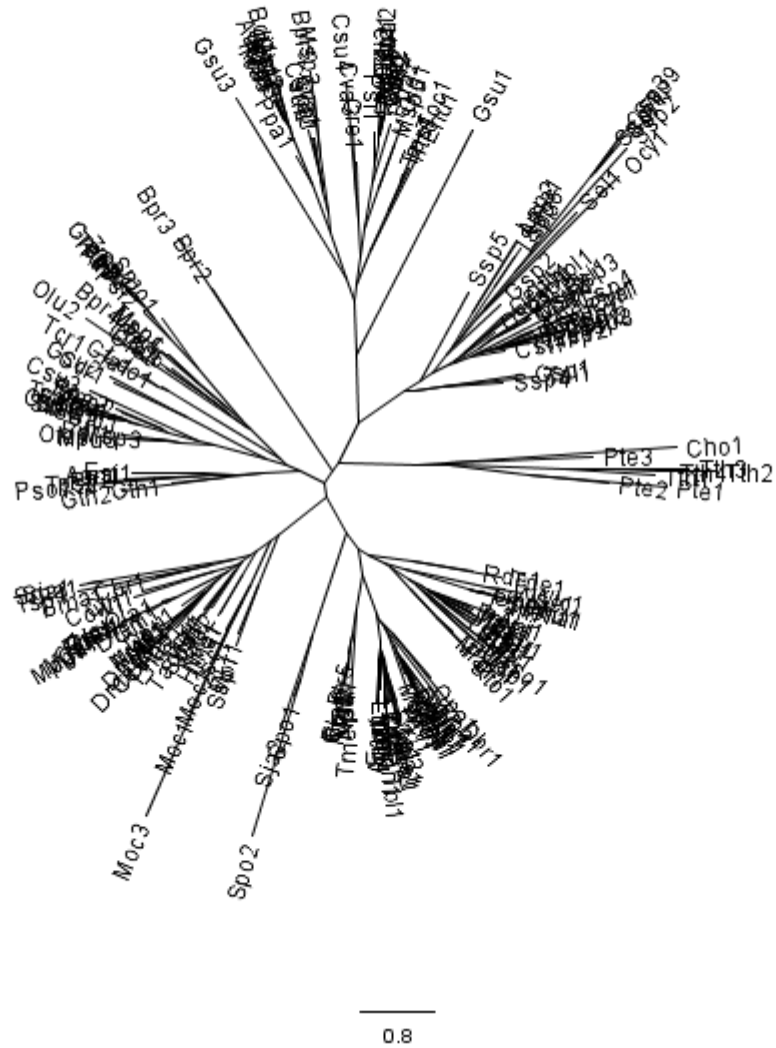

Fig. 21B

CaCA2 - Mafft

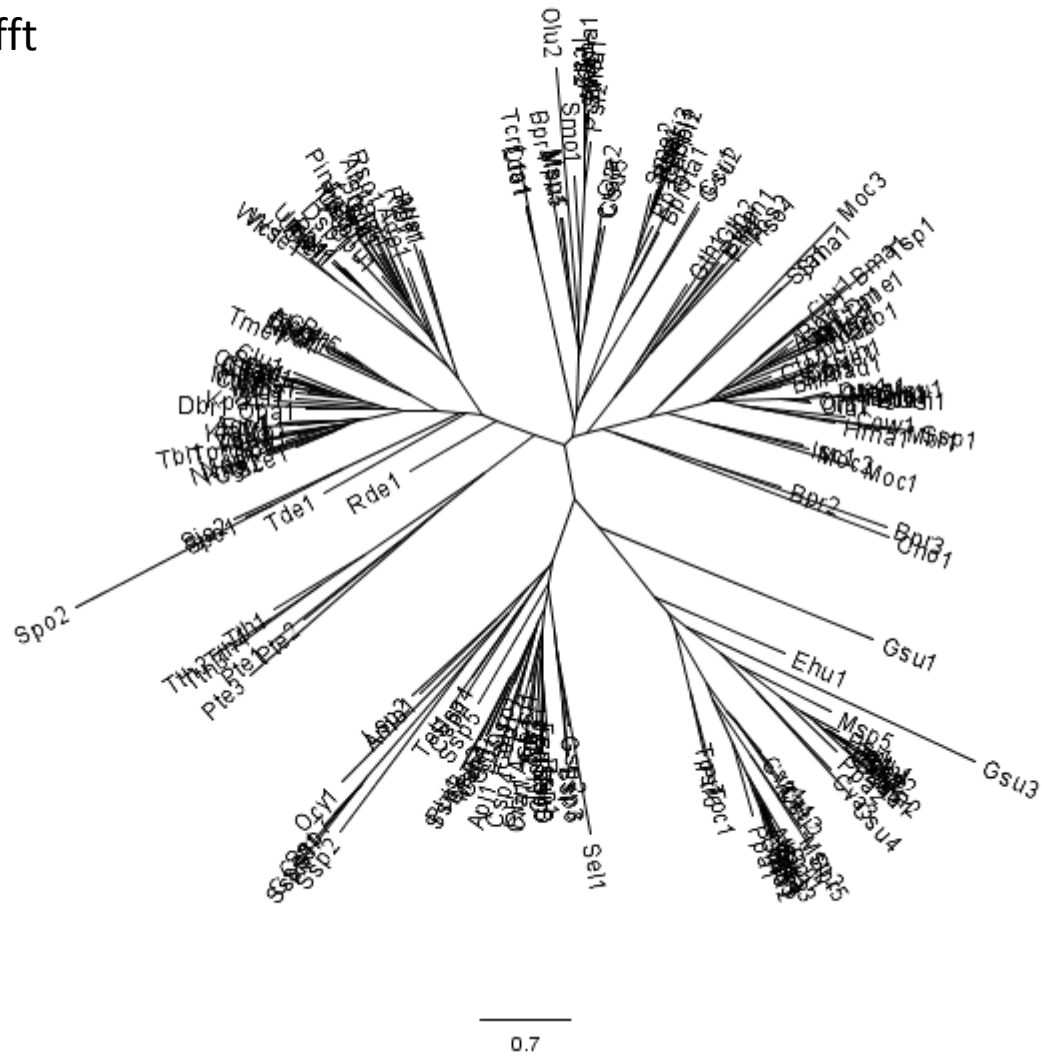

Fig. 21C

CaCA2 - ProbCons

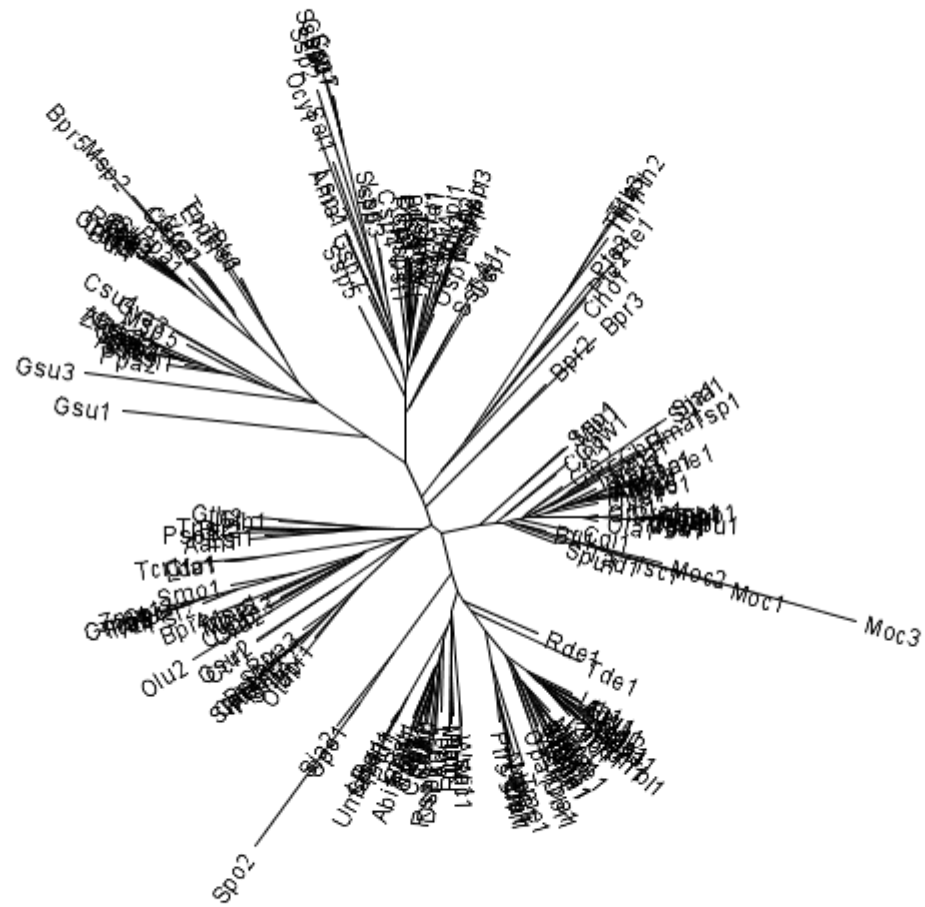

Fig. 22A

MntP - Clustal

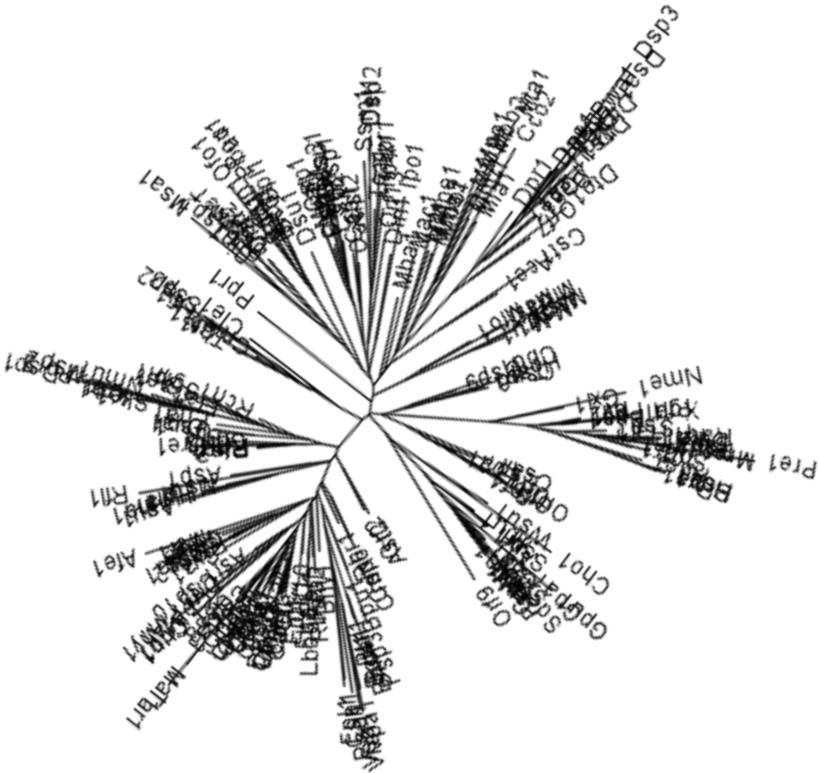

**Fig. 22B**

MntP - Mafft

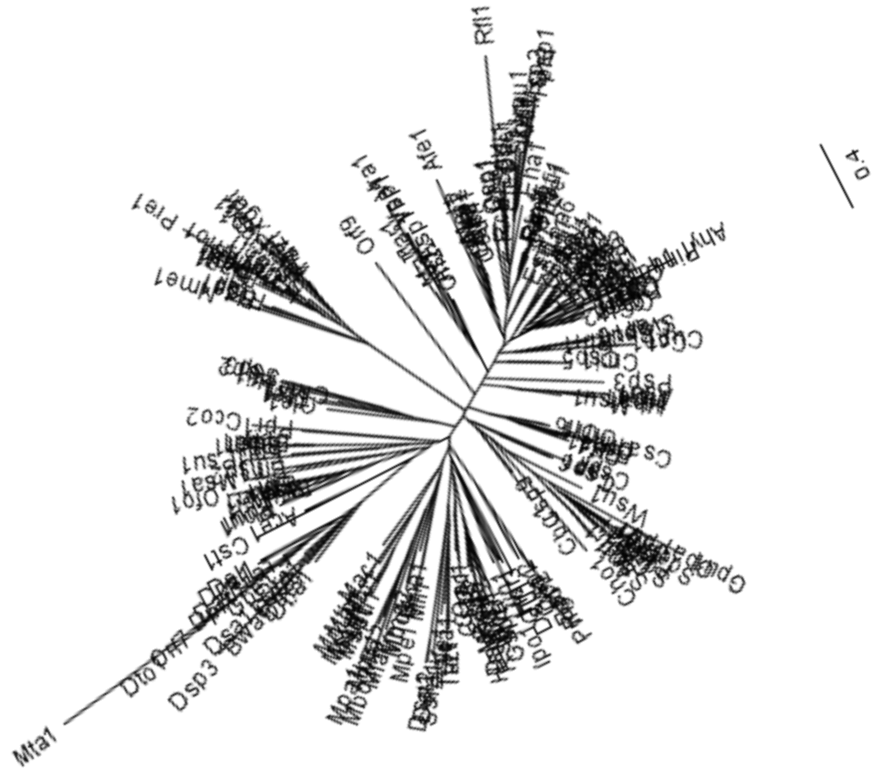

Fig. 22C

MntP - ProbCons

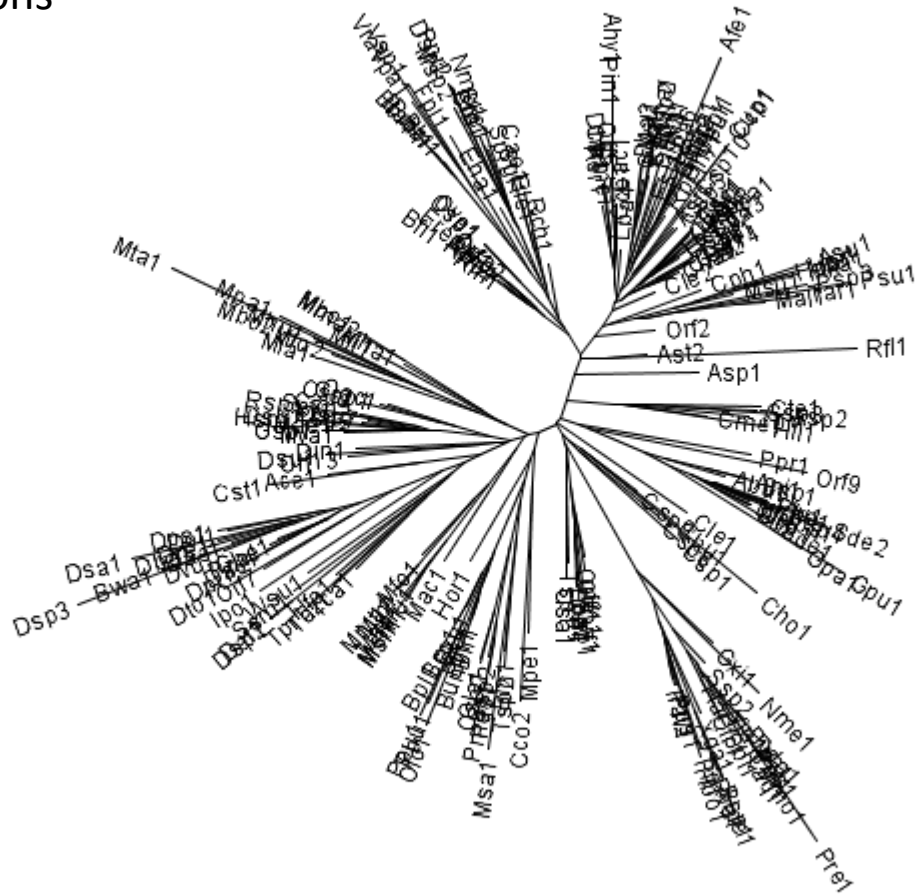

Fig. 23A

ILT - Clustal

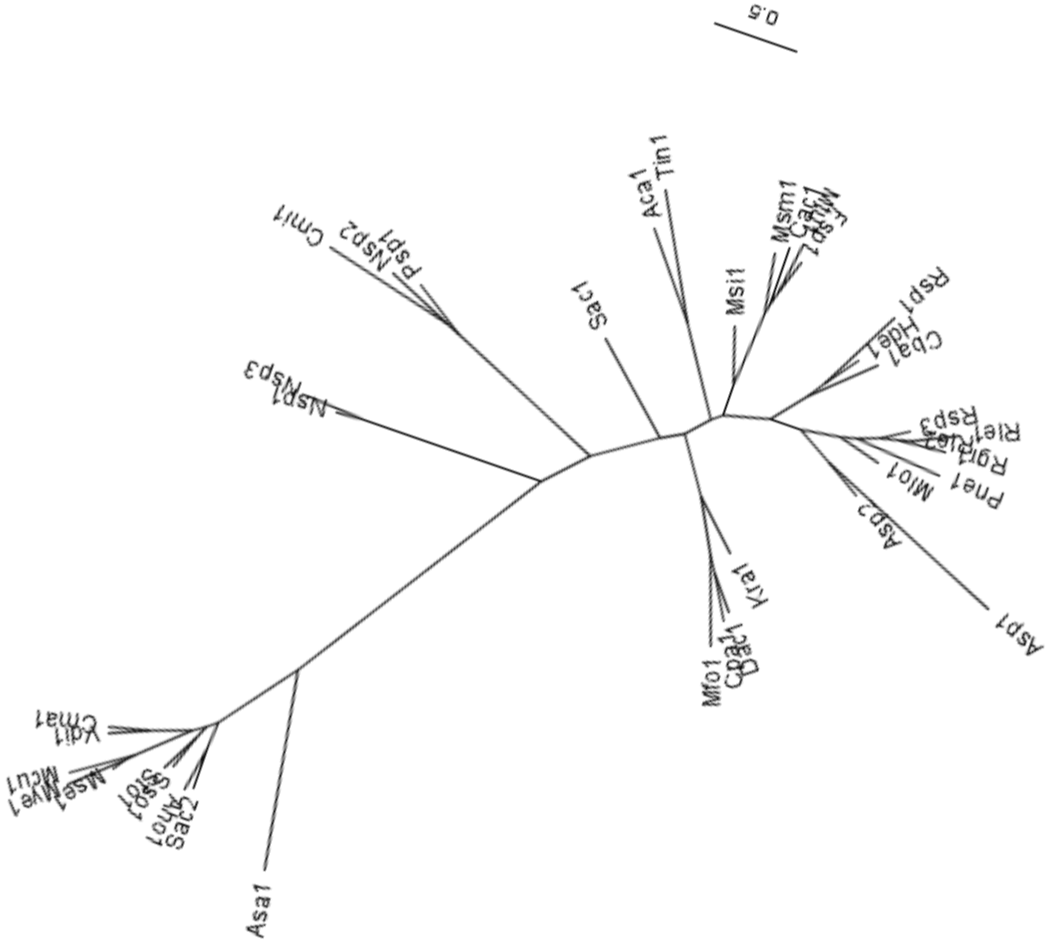



**Fig. 23B**

ILT - Mafft

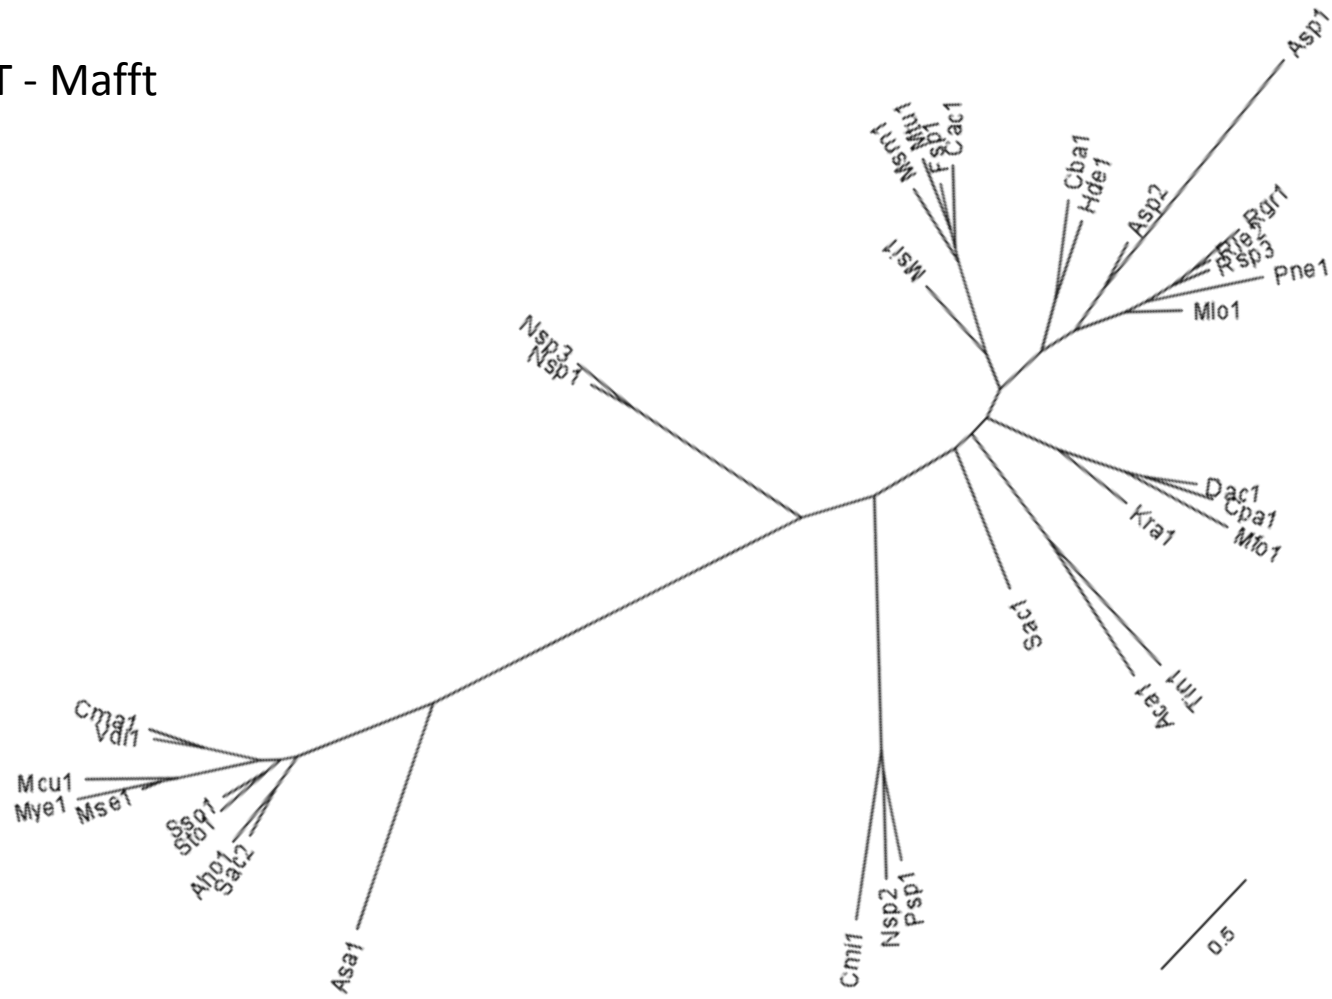

**Fig. 23C**

ILT – ProbCons

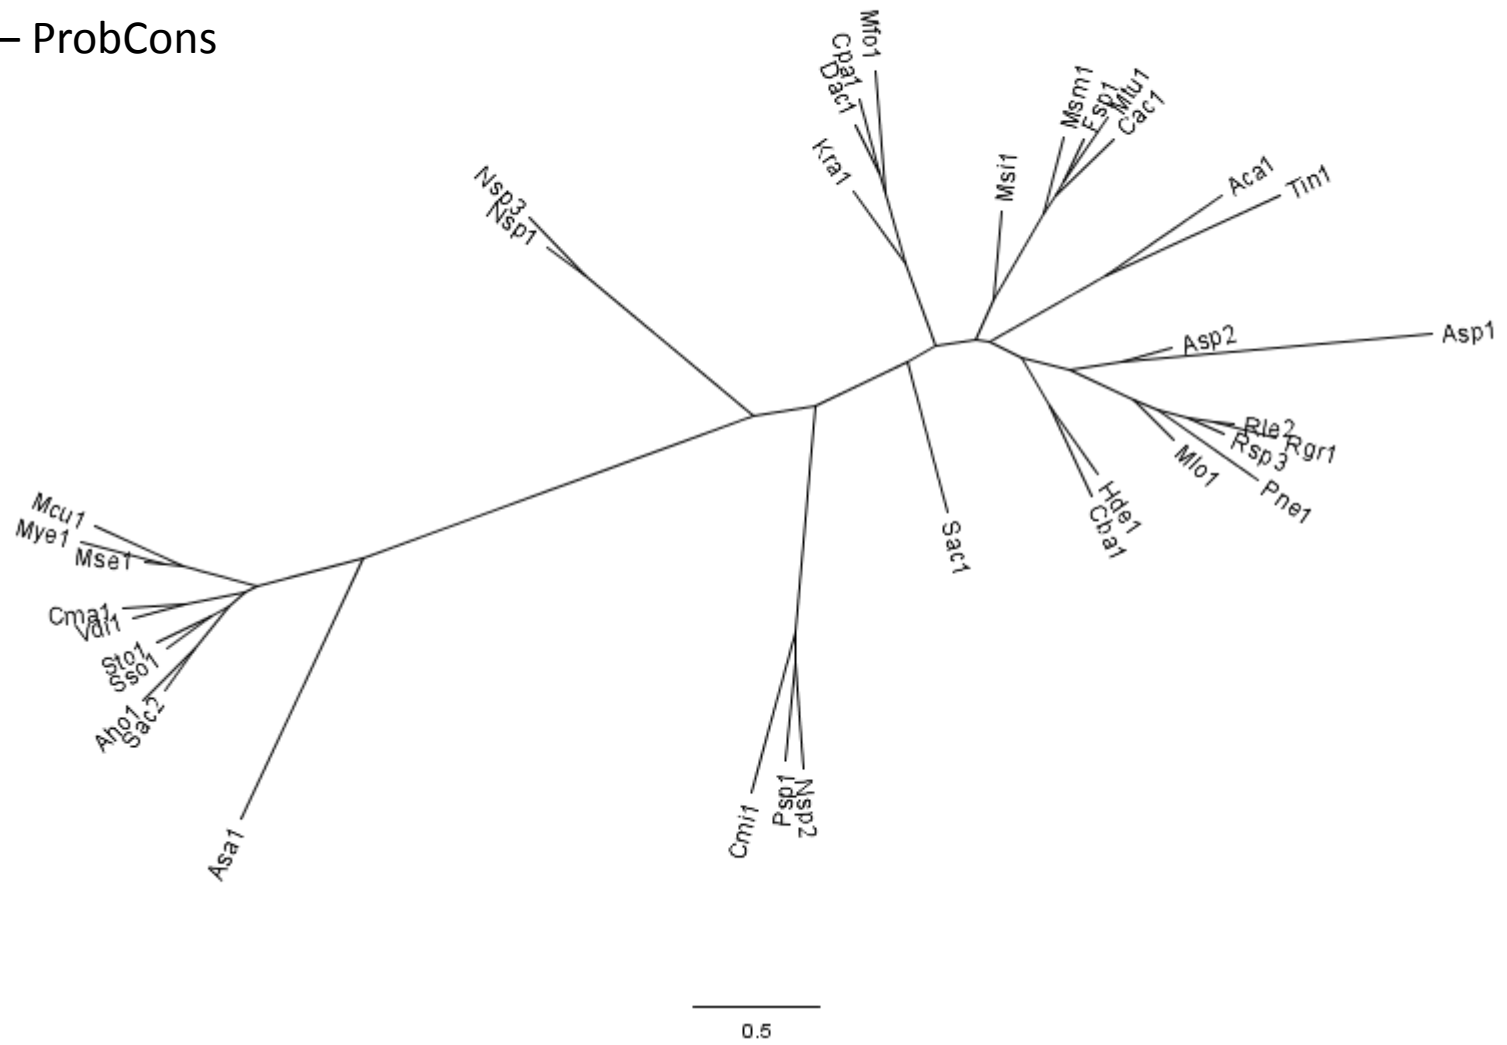



**Fig. 24B**

TerC - Mafft

0.6

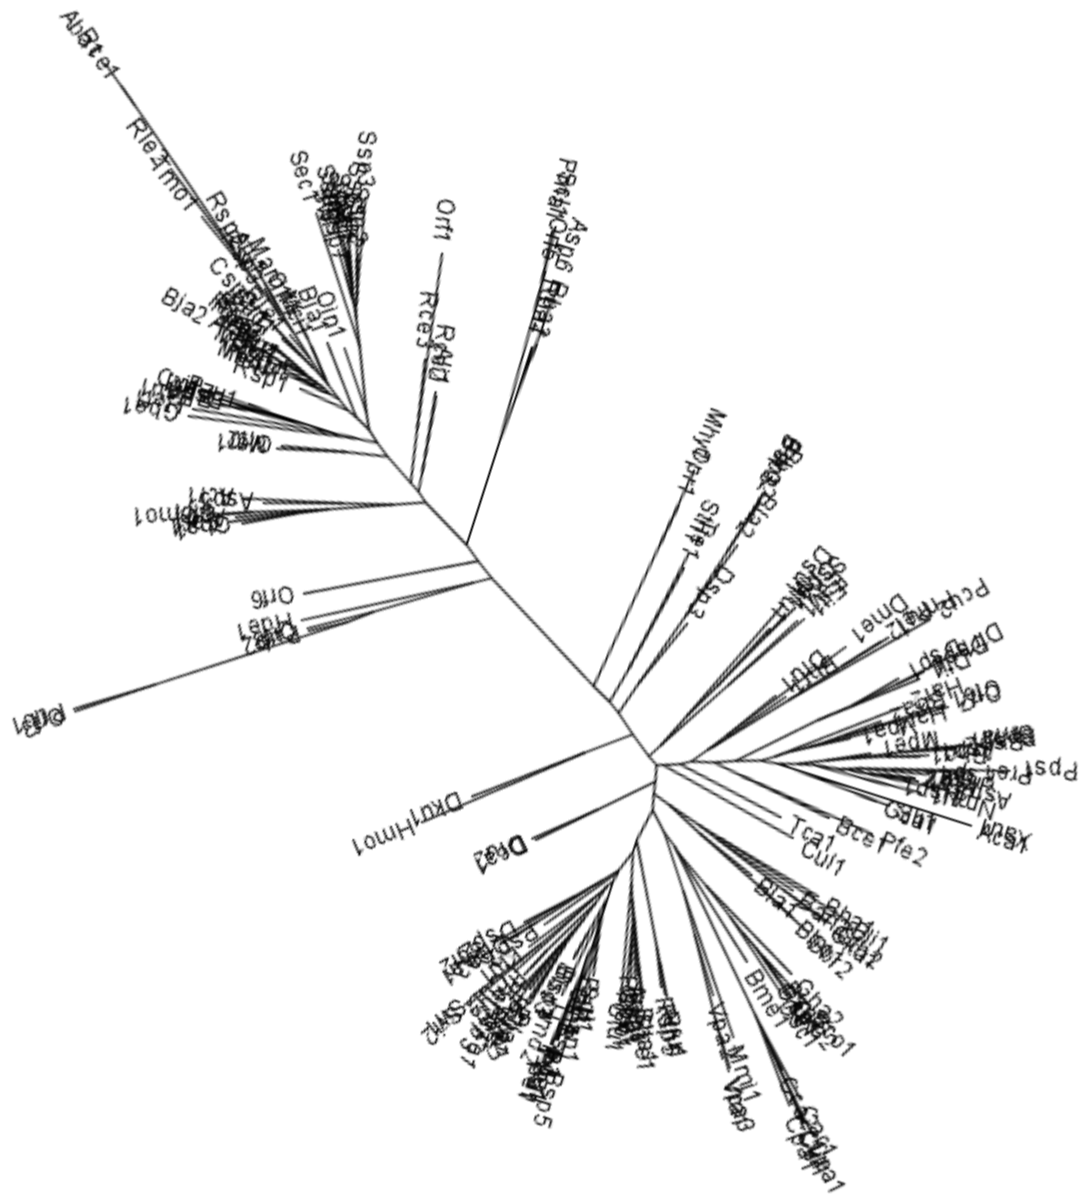

**Fig. 24C**

TerC - ProbCons

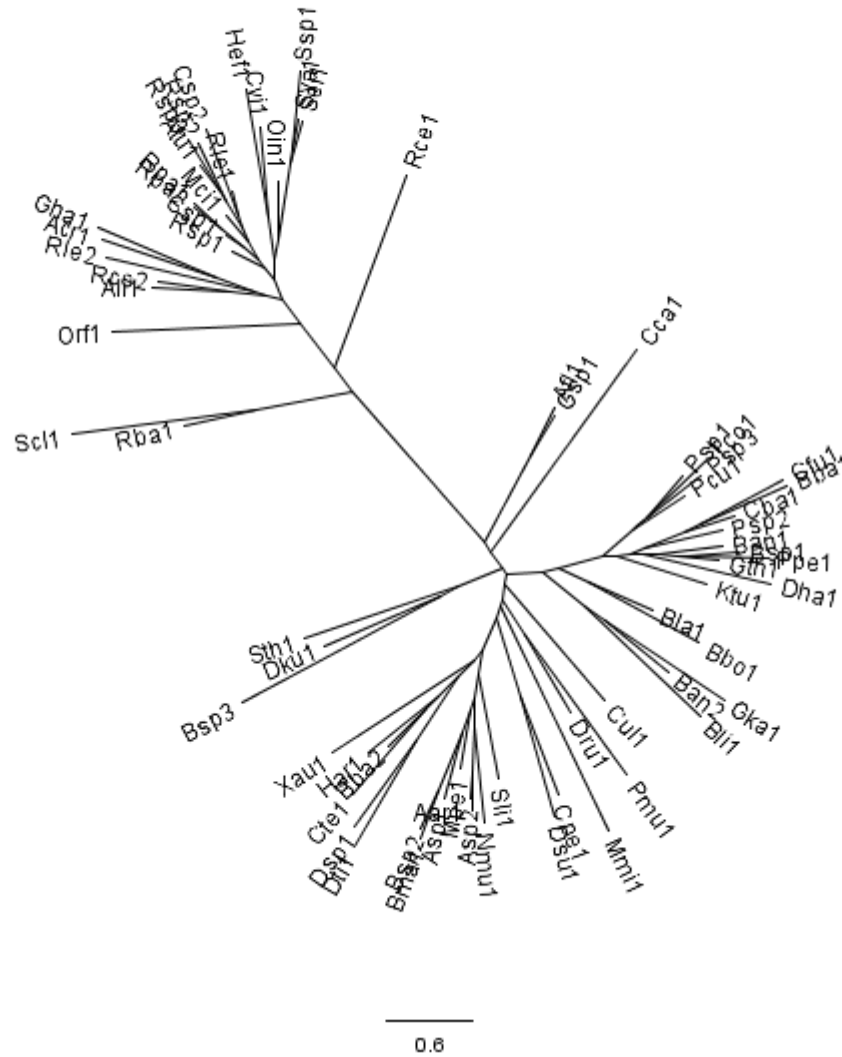





Fig. 25C

NAAT - ProbCons

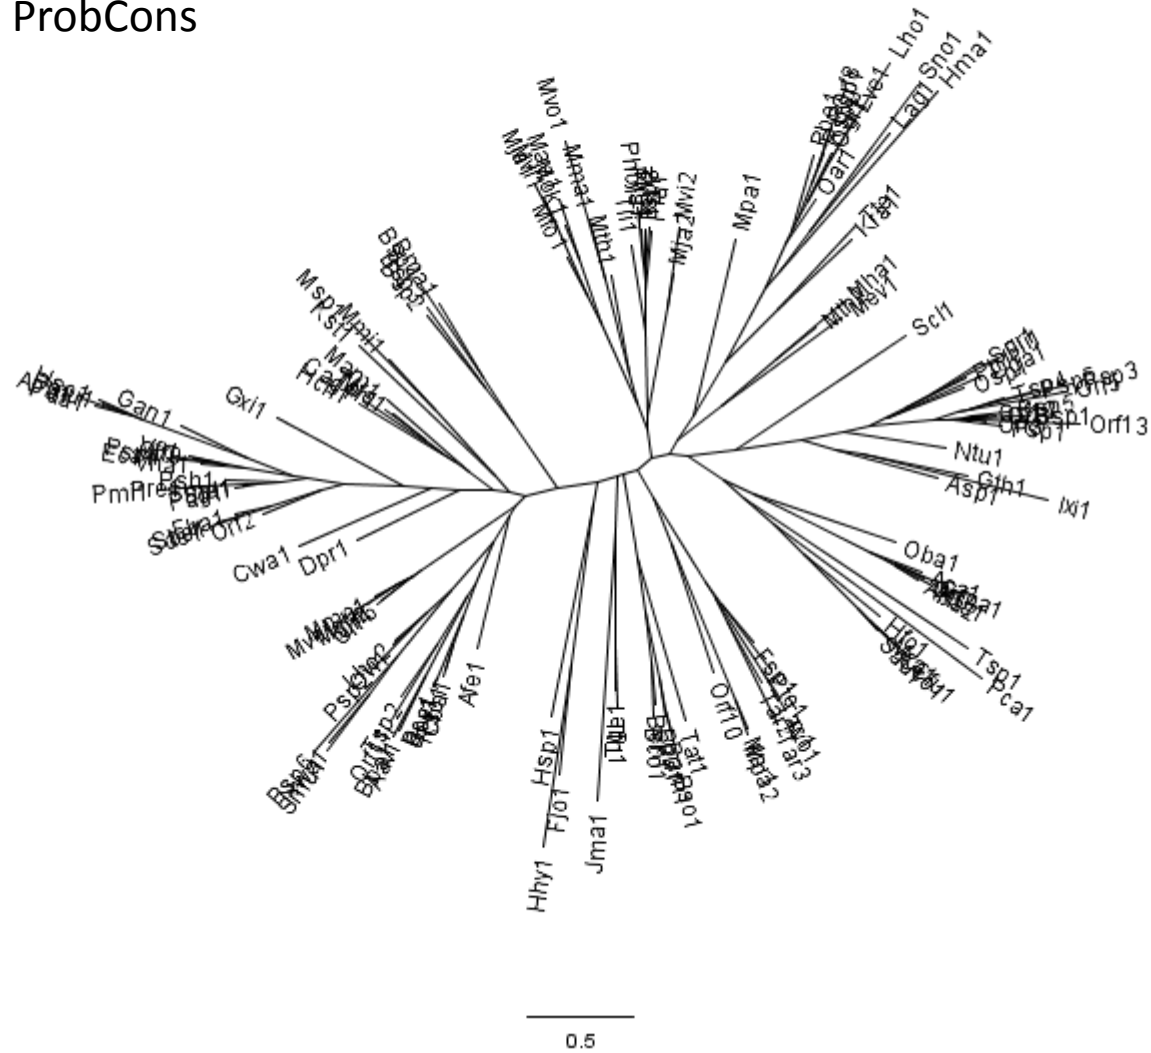



**Fig. 26A**

NicO – Clustal

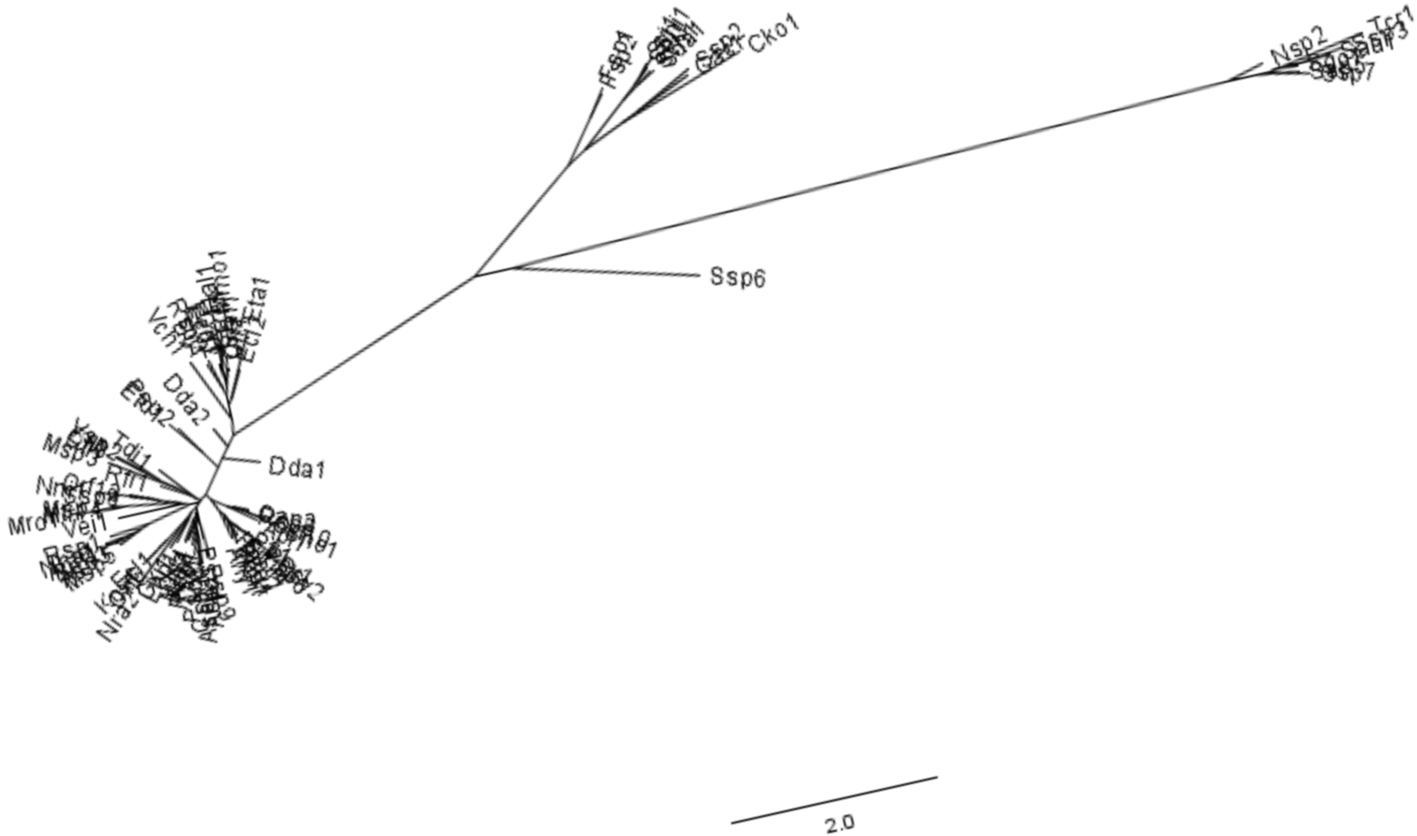

**Fig. 26B**

NicO - Mafft

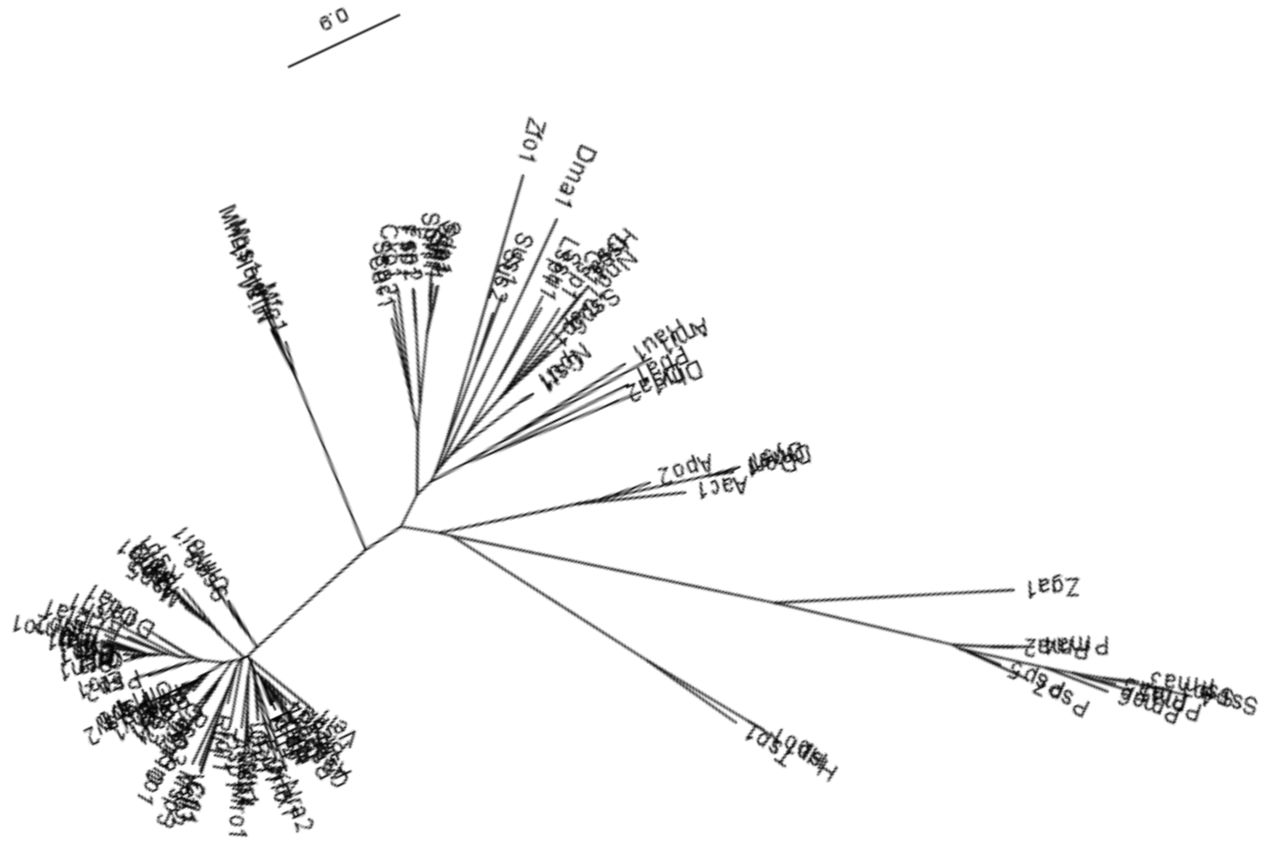



Fig. 27A

GAP – Clustal

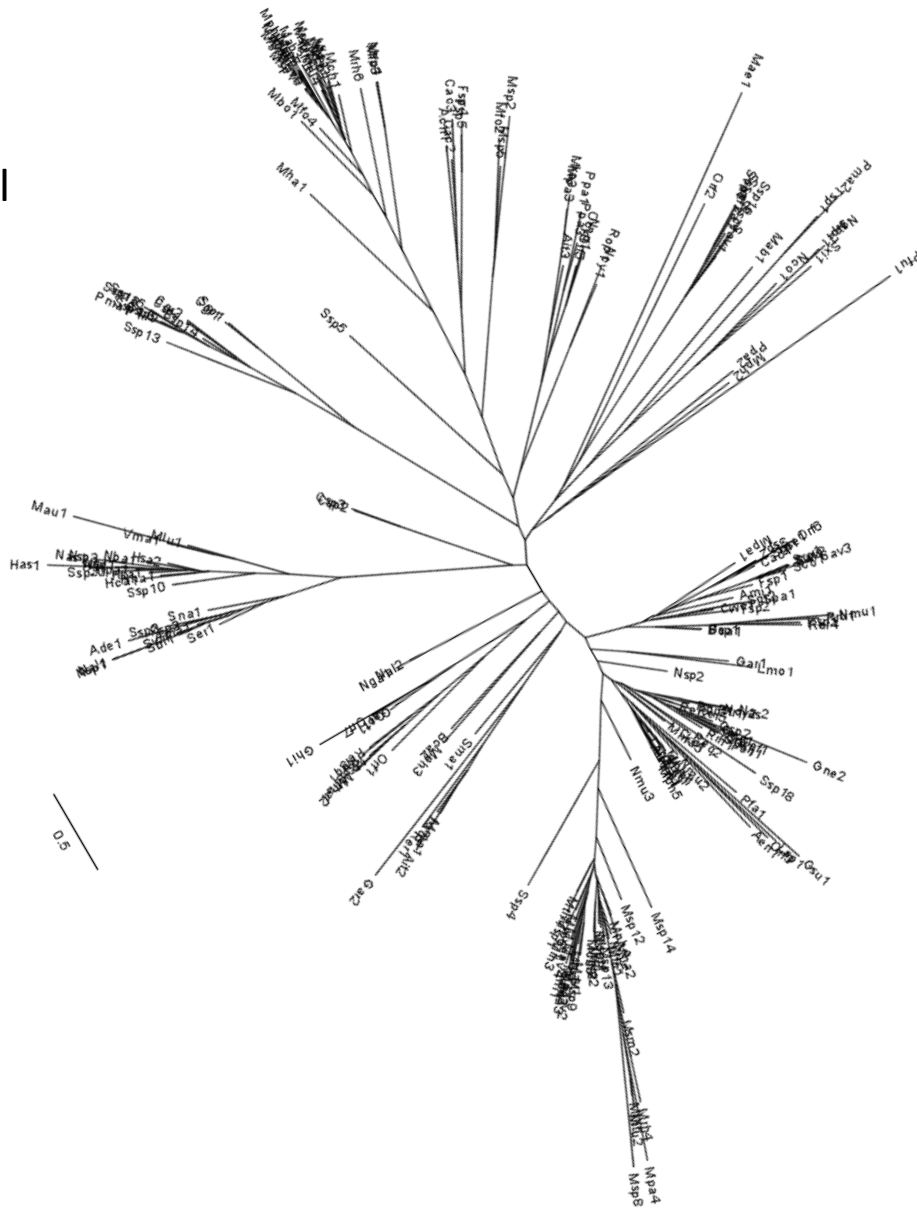

**Fig. 27B**

GAP - Mafft

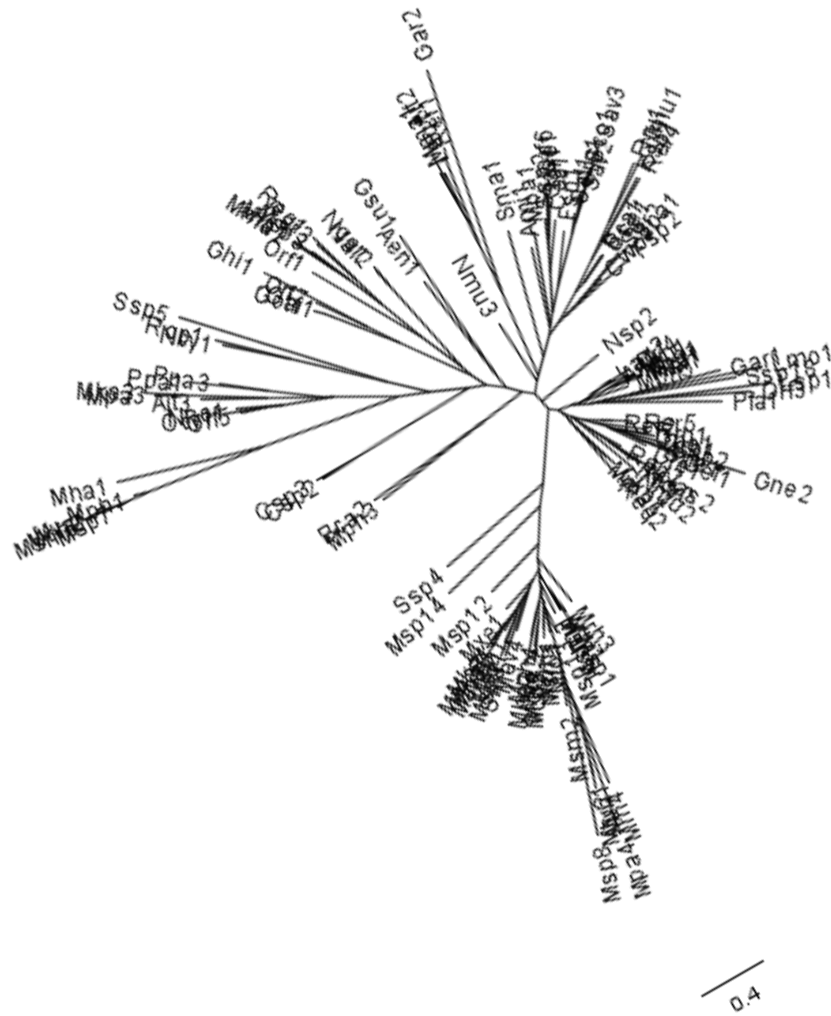

Fig. 27C

GAP - ProbCons

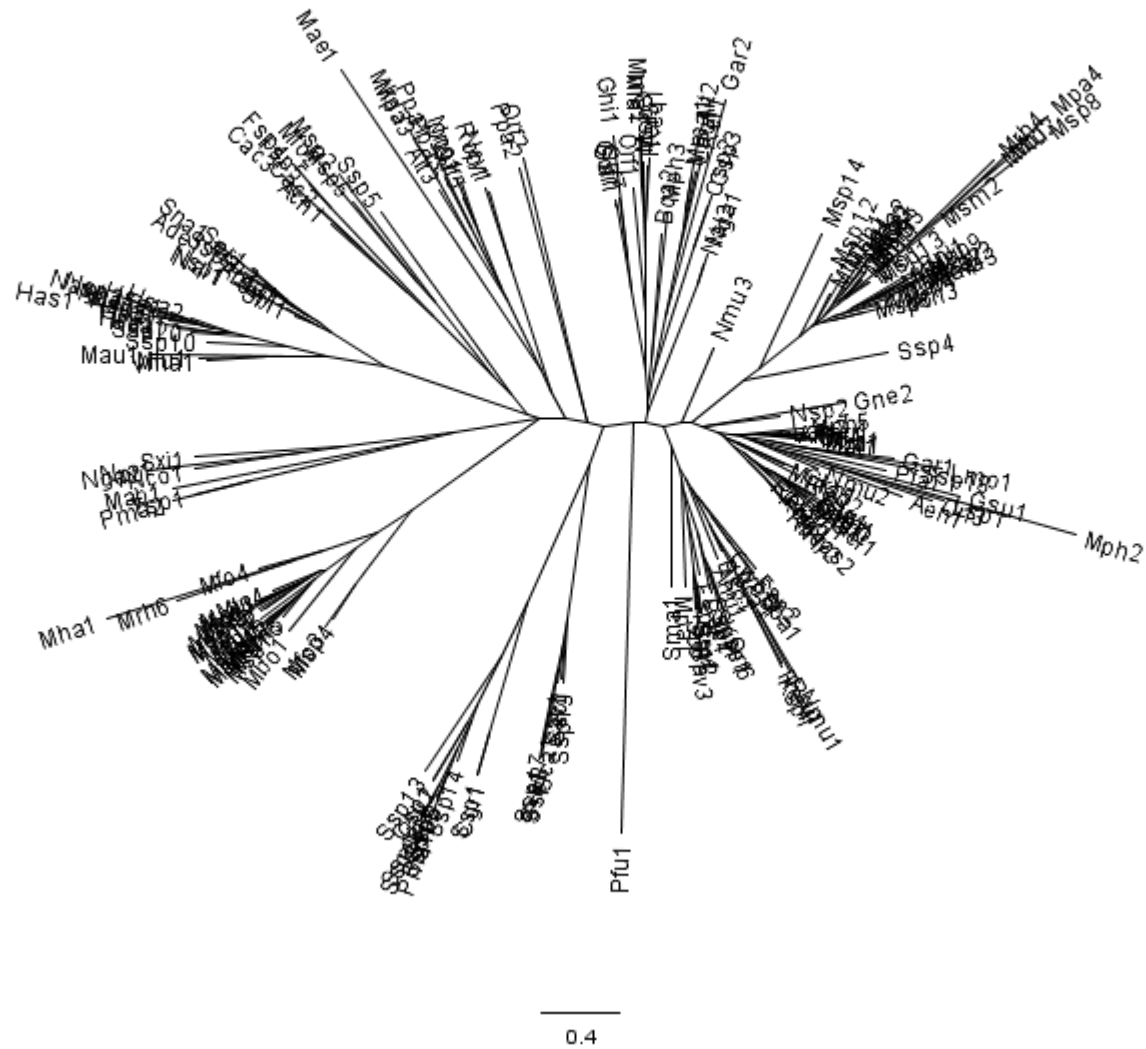

**Fig. 28A**

DsbD – Clustal

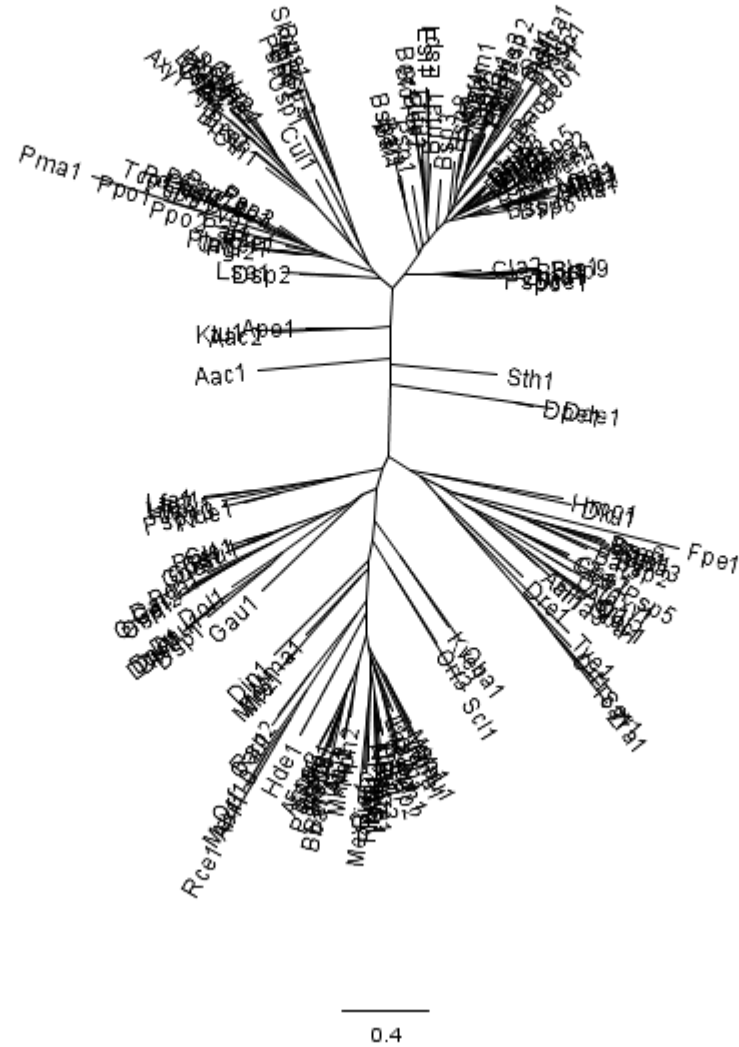

Fig. 28B

DsbD - Mafft

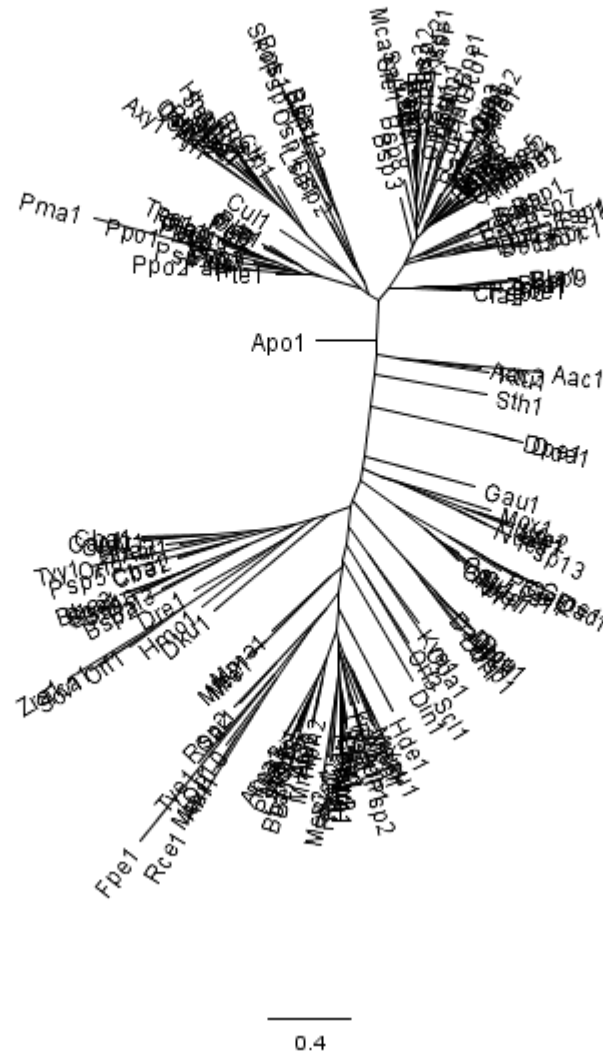



Fig. 28C

DsbD - ProbCons

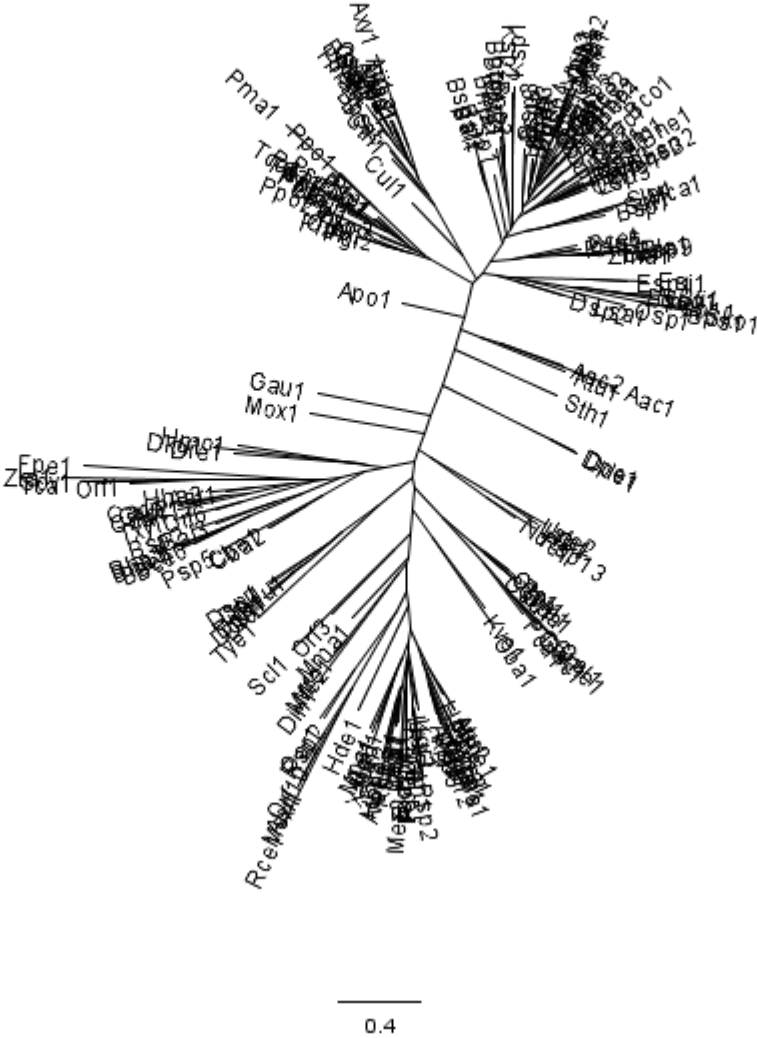

Supplement: pone.0137184.s036.pdf [file pone.0137184.s036.pdf]
