# Supplementary material for: The LysE Superfamily of Transport Proteins Involved in Cell Physiology and Pathogenesis
Source: PubMed Central journal article supplement (PMC4608589; doi:10.1371/journal.pone.0137184), 2015-10-16
Supplement: pone.0137184.s002.pdf [file pone.0137184.s002.pdf]

# Fig. S2A

```

# 1: A_Sequence: Pst1 (2.A.75.1.1 homologue)
# 2: B_Sequence: Bth1 (2.A.76.1.5 homologue)
# Matrix: EBLOSUM62
# Gap_penalty: 8.0
# Extend_penalty: 2.0
#
# Length: 171
# Identity:      57/171 (33.3%)
# Similarity:   87/171 (50.9%)
# Gaps:        20/171 (11.7%)
# Score: 159.0
#=====
A_Sequence      1  LILPLGPQNAFVLN----QGVKRHYHLMMTATLCSLSSDVVLICAGIFGGSA      46
                  :| | | | | : | | | : | | | | : | | | : | | |
B_Sequence      1  ILLP-GPNSMYVLSLAAQRGVKAGYRAACGVF--VGDTVLMVLSAAGVAS      47
                  1 2
A_Sequence      47 LLQQSPLLLLTVITWAGVAFLLWYGWGALRTAFRRELALA-SGLDIRQS-R      94
                  ||: :| | | :| : : | | :| | : | | | | :| : | :| | :| :|
B_Sequence      48 LLKANPLLFSVVKYGGAAYLLYIGSGMLRGAWRKLARPADAGADVRRAVD      97
                  3
A_Sequence      95 G-RIIATLLAVTWLNPHVYLDTFVVLGSLGSQFPD---TH-ARQWFALGT      139
                  | | | | | | : | | | | | : | | | | | : | |
B_Sequence      98 GERPFRKALVVSLLNPKAIL--FFI--SFFIQFVDPSYAHPALSFVVLGA      143
                  4 5
A_Sequence      140 VS--ASVLWFFGLALLAAWLA      158
                  :: | | :| : | | |
B_Sequence      144 IAQFASFVYLSTLIFTGARLA      164
#-----
===== FINISHED =====
Average Quality (AQ)      18.75 +/- 6.96
Standard score (Z):      20.0
Precise score (Z):      20.1

```

# Fig. S2B

```

# 1: A_Sequence: Hal1 (2.A.76.1.5 homologue)
# 2: B_Sequence: Ok11 (2.A.77.1.1 homologue)
# Matrix: EBLOSUM62
# Gap_penalty: 8.0
# Extend_penalty: 2.0
#
# Length: 124
# Identity:      33/124 (26.6%)
# Similarity:    63/124 (50.8%)
# Gaps:          12/124 ( 9.7%)
# Score: 107.0
#=====
                2                               3
A_Sequence      1 IGDAVLIFCAYIGIASLIRSSPFLFSLVKMLGALYLLYLGLKILYSTLAK      50
  | | : ||   : : : | | : : |   : : : || | : : : || | : |
B_Sequence      1 IGNGILIVMSLL-LAYLLKFIPESW-ILGLLG-LFPITVGLKTFES----      43
                2                               3
                4
A_Sequence      51 KGQEQSAAKEEPEHTFRKALTLSLTNPKA--ILFYVSFFVQFIDMDYAHT      98
  | | : ||   | | : : || | : | : ||   : | : : |
B_Sequence      44 KEDETAKAKASDAHLIRDVVLMTLTTCSADNLAIYIPFFA---SVDFSYL      90
                4
                5
A_Sequence      99 GVSFAILAVILEMISFCYMTLLIF      122
  | : : || : || : : |
B_Sequence      91 PVILIVFLLILSAVSETALKITKF      114
                5
#-----
===== FINISHED =====
Average Quality (AQ)      23.76 +/- 7.02
Standard score (Z):      12.0
Precise score (Z):      11.9

```

# Fig. S2C

```

# 1: A_Sequence: Asp2 (2.A.75.1.3 homologue)
# 2: B_Sequence: Cth1 (2.A.77.1.2 homologue)
# Matrix: EBLOSUM62
# Gap_penalty: 8.0
# Extend_penalty: 2.0
#
# Length: 144
# Identity:      38/144 (26.4%)
# Similarity:   65/144 (45.1%)
# Gaps:         14/144 ( 9.7%)
# Score: 92.0
#=====
A_Sequence      1 LRQGLRREHVMPVVLVLCALSDAVLLQVGVWGMGGVLLARPEWAQFMRWAG      50
                2                               3
                :  || |:: :      :  || : :  ||::: | || :  |
B_Sequence      1 INANFRRRHIV-IGQYLGFTTIVLASLPGF-FGGLIVPR-EWIGLL---G      44
                2                               3
A_Sequence      51 ALFLLMYAAQTAARALRPGQLLVATSGPGTSLRTTLATVVALTWLNPHVY      100
                | ::: | | : | : || : | | : : : | : || | |
B_Sequence      45 LLPIIIGFKQLVNRKIETVQVQTVTSFENSSYRNSTFSFL-LSLLNPHTY      93
                4                               4
A_Sequence      100 LDTVLLGTMATPYPAWGRALFAAGGSLAS-----ALWFLLIGL      139
                | | : || | | || | : : | : : | :
B_Sequence      94 KVAAVTLANGGDNISYI-IPLF-AGSQLASLSIILAVFFLMVGV      135
                5                               5
#-----
===== FINISHED =====
Average Quality (AQ)      16.11 +/- 6.25
Standard score (Z):      12.0
Precise score (Z):      12.1

```
