# Supplementary material for: The LysE Superfamily of Transport Proteins Involved in Cell Physiology and Pathogenesis
Source: PubMed Central journal article supplement (PMC4608589; doi:10.1371/journal.pone.0137184), 2015-10-16
Supplement: pone.0137184.s003.pdf [file pone.0137184.s003.pdf]

# Fig. S3A

```
# 1: A_Sequence: Efa1 (2.A.77.1.1 homologue)
# 2: B_Sequence: Ptr2 (2.A.106.1.1 homologue)
# Matrix: EBLOSUM62
# Gap_penalty: 8.0
# Extend_penalty: 2.0

# Length: 115
# Identity:      32/115 (27.8%)
# Similarity:   57/115 (49.6%)
# Gaps:         11/115 ( 9.6%)
# Score: 108.0
#=====
                1                               2
A_Sequence      1 LQNILSALAVYISTSI-DYLFILLIIFSQNHTKKGLRQIFFGQYLGTGIL      49
                |::|: |:| | | | : : | |:: :||| | :|
B_Sequence      1 WNAFTSSVAMIIATEIGDKTFFIAAVLSMKHSRSA---VFFGAILALIVM      47
                1                               2

                3
A_Sequence      50 VAISLFAAYVL-NFIPQDWIIIGLLGLIPIYLGIRVAF-----VGESEEEE      92
                :| :| |||:|:| | ||: :| | :: : | : ||
B_Sequence      48 TVLSTAMGMMLPNFIPKEYTHLLGGLLEFLYFGCKLIYDSRQMEAGKTSEE      97
                3

A_Sequence      93 EGEVVEKLGSRGTNR      107
                || |:| :| :
B_Sequence      98 LEEVEEELLQQGKKK      112
#-----
===== FINISHED =====
Average Quality (AQ)      15.13 +/- 6.54
Standard score (Z):      14.0
Precise score (Z):      14.2
```

# Fig. S3B

```
# 1: A_Sequence: Cac2 (2.A.75.1.1 homologue)
# 2: B_Sequence: Mpu4 (2.A.106.1.1 homologue)
# Matrix: EBLOSUM62
# Gap_penalty: 8.0
# Extend_penalty: 2.0
```

```
# Length: 139
# Identity:      38/139 (27.3%)
# Similarity:   62/139 (44.6%)
# Gaps:        16/139 (11.5%)
# Score: 91.0
```

```
#####
1                               2
A_Sequence      1 LSLIVAVGPQNAMLLKYGIRRDHIGLIIVVCALSDVILITSGTAGVGYLV      50
                  | |: |: | : | | | : : : | : : | |:| |||
B_Sequence      1 LILLTEIGDKTFFLAMMLAAR-HGKLVQVFLASISALFFMTLGSALAGYLV      49
                  1                               2

                               3
A_Sequence      51 ----ERFPNALEALKYIGAAYLAFFTFCFRDAFKTKGEAIDVESTSPNS      96
                  | : : : : : | | | | | | | | :
B_Sequence      50 STSAEMLHSSVKIMDWVAAVLFVLEFGAQMLWDARKLHKE--DAKD-----      92
                  1                               3

A_Sequence      97 TEEVATFDGDDSTGGVGTEHGSVATATATQRQEIKRSP      135
                  ||| | |: | : || | | | | : : ||
B_Sequence      93 -EEVAALLG-GE--GARSSSHGERADAEETLREKDEKSP      127
```

```
#-----
===== FINISHED =====
Average Quality (AQ)      12.36 +/- 5.83
Standard score (Z):      13.0
Precise score (Z):      13.5
```

# Fig. S3C

```

# 1: A_Sequence: Hall1 (2.A.76.1.5 homologue)
# 2: B_Sequence: Cmi1 (2.A.106.1.1 homologue)
# Matrix: EBLOSUM62
# Gap_penalty: 8.0
# Extend_penalty: 2.0

# Length: 166
# Identity:      42/166 (25.3%)
# Similarity:    81/166 (48.8%)
# Gaps:          19/166 (11.4%)
# Score: 103.0
#=====
                2                               3
A_Sequence      1 LAVFIGDAVLIFCAYIGIASLIRSSPFLFSL-VKMLGALYLLYLGLKILY      49
                  |:|:| |  :::  |  |  | |  |  |  |  |  |  |  |  |  |  |  |  |
B_Sequence      1 LSVWIGQLLMLLPKLVG-QYLPPSLGFLTHISIEYVGAVLFFFGIKLLY      49
                  2                               3

                4
A_Sequence      50 S--TLAKKGQ-----EQSAAKEEPEHTFRKALTL-SLTNPKAILFYVSFF      91
                  |  :::|  |  |  |  |  |  |  |  |  |  |  |  |  |  |  |  |  |
B_Sequence      50 SARNMSRKT DIEVMAEAEAEI EDGERKFKQRNT AWKIFIESGVLTFVAEW      99
                  4

                5
A_Sequence      92 ---VQFIDMDYAHTGVSFAILAVILEMISFCYMTLLIFSGAALAHFLSEK      138
                  ||  :  |  |  |  |  |  |  |  |  |  |  |  |  |  |  |  |  |
B_Sequence      100 GDRTQFATVTLAATKDSLGVMAGGIVGHAICAL-IAVIGGRAIASHISE-      147
                  5

                6
A_Sequence      139 KRLAKLGNSMVGLLEFL      154
                  :  :  :|  |  |  |  |
B_Sequence      148 RTITIIIG---GLLEFI      159
                  6
#-----
===== FINISHED =====
Average Quality (AQ)      18.42 +/- 6.49
Standard score (Z):      13.0
Precise score (Z):      13.0

```
