# Supplementary material for: The LysE Superfamily of Transport Proteins Involved in Cell Physiology and Pathogenesis
Source: PubMed Central journal article supplement (PMC4608589; doi:10.1371/journal.pone.0137184), 2015-10-16
Supplement: pone.0137184.s004.pdf [file pone.0137184.s004.pdf]

# Fig. S4A

```

# 1: A_Sequence: Kor1 (2.A.76.1.5 homologue)
# 2: B_Sequence: Cce1 (2.A.107.1.2 homologue)
# Matrix: EBLOSUM62
# Gap_penalty: 8.0
# Extend_penalty: 2.0

# Length: 105
# Identity:      26/105 (24.8%)
# Similarity:   58/105 (55.2%)
# Gaps:        9/105 ( 8.6%)
# Score: 80.0
#=====
A_Sequence      1  LYLAYLGINMLRGAWAARRRTAAQAPAQTLSNIH3THDNV-FRH4HALLLSLS 49
   : || : ||| : : : | : : : | : : : | : : : | : : : | : : :
B_Sequence      1  ILLAIIGINMIKES----RNSSCEVAVDTVADVNTD3NLSL4SFKNMF4VLAVA 46

A_Sequence     50  NPKAALFFLSFFIPFVNP5RYPHPAL5SFFILA5AVMQ5TLSM5CYLATLALAGD 99
   || : | : | | : | | | | : : : | :
B_Sequence     47  TSIDAL-AVGITFAFLNVNI-IPAV5SF--IGIVTFTLSMIGV5RIGSVFGE 92

A_Sequence     100 KLLAK      104
   | : :
B_Sequence     93  KFKSR      97
#-----
===== FINISHED =====
Average Quality (AQ)      11.53 +/- 4.99
Standard score (Z):      14.0
Precise score (Z):      13.7

```

# Fig. S4B

```

# 1: A_Sequence: Hku1 (2.A.77.1.5 homologue)
# 2: B_Sequence: Dvu1 (2.A.107.1.2 homologue)
# Matrix: EBLOSUM62
# Gap_penalty: 8.0
# Extend_penalty: 2.0

# Length: 137
# Identity:      41/137 (29.9%)
# Similarity:   69/137 (50.4%)
# Gaps:         16/137 (11.7%)
# Score: 110.0
#=====
                                     3                                     4
A_Sequence      1 -DKWIVGLLGLIPLFIGIKFALSGEDEDETEEIREKIEQDKSKNLLWTVV      49
   | | :      | | : | | : :      :      |      : | | |      : :      | : : | | : :
B_Sequence      1 WDHWLA--FGLL-LYIGVR--MMREAFEETEENDDRDRC--DPTRGL--TLI      41
                                     3                                     4

                                     5
A_Sequence      50 LLTIASGGDNLGVYIPFSSLNWSKIIIVLIIIFAIGIAILCELSRSLSKI      99
   : | : | : | | | :      | | :      | | |      | | :      | : |
B_Sequence      42 MLAVATSIDALAVGL----SLSVLGIDIVTPAIVIGVVCLLFTATGLHLG      87
                                     5

                                     6
A_Sequence      100 PMVS--EIIIEKYEKIIVPVVFIALGIYIMYENGTIQT      134
   | : |      | : :      :      | | | : | : | : | : |
B_Sequence      88 RMLSRAESLGRRRAALAGGVVLIGIGLRILYEHGVFDT      124
                                     6

#-----
===== FINISHED =====
Average Quality (AQ)      14.66 +/- 6.04
Standard score (Z):      16.0
Precise score (Z):      15.7

```

# Fig. S4C

```

# 1: A_Sequence: Csp2 (2.A.106.1.1 homologue)
# 2: B_Sequence: Eco2 (2.A.107.1.1 homologue)
# Matrix: EBLOSUM62
# Gap_penalty: 8.0
# Extend_penalty: 2.0

# Length: 152
# Identity:      47/152 (30.9%)
# Similarity:    70/152 (46.1%)
# Gaps:          15/152 ( 9.9%)
# Score: 134.0
#=====
                2                               3
A_Sequence      1 AALASMTLLSVLMGQAISFLPKHYI----HWAEIALFLGFGLKLIYDASQ 46
                | | | | | | | | | | | | | | | | | | | | | | | |
B_Sequence      1 AVFGSVETLTPLIGWAIGSVAQHYIADWDHWIAFTLLLLLGLRMIYGALQ 50
                2                               3

                4
A_Sequence      47 MPSQSQGTVIKEAAEAVDQIPQSGNR-----LTKLLARYYPQIGIWLQAFS 91
                | | | | | | | | | | | | | | | | | | | | | | | |
B_Sequence      51 -PEQPAG---EQSAEAQPESGQSGRRPPSPLMLVAIAFATSIDSMIVGVG 96
                4

                5
A_Sequence      92 MTFLAEWGDRTQISTIALASS-YNVIGVTTGAILGHGICSVIAVIGGKLV 140
                : | | | | | | | | | | | | | | | | | | | | | | | |
B_Sequence      97 LAFL-EVNILLTALAIGLATTIMAAIGLRLGSFLGSAIGKRAEILGGLVL 145
                5                               6

A_Sequence      141 AG      142
                |
B_Sequence      146 IG      147
#-----
===== FINISHED =====
Average Quality (AQ)      22.13 +/- 7.43
Standard score (Z): 15.0
Precise score (Z): 15.1

```
