# Supplementary material for: The LysE Superfamily of Transport Proteins Involved in Cell Physiology and Pathogenesis
Source: PubMed Central journal article supplement (PMC4608589; doi:10.1371/journal.pone.0137184), 2015-10-16
Supplement: pone.0137184.s005.pdf [file pone.0137184.s005.pdf]

# Fig. S5A

```
# 1: A_Sequence: Lbr1 (2.A.77.1.1 homologue)
# 2: B_Sequence: Sma2 (2.A.108.2.4 homologue)
# Matrix: EBLOSUM62
# Gap_penalty: 8.0
# Extend_penalty: 2.0

# Length: 207
# Identity:      55/207 (26.6%)
# Similarity:   101/207 (48.8%)
# Gaps:         31/207 (15.0%)
# Score: 138.0
#=====
                1                2
A_Sequence      1 IDYLIILMVIFGA--TPKRHRFLVYLGDFLGTAILVLTSYLMAVILGFV-      47
                :: |::: : |      | | | :: :|| | : || | : |::| | :
B_Sequence      1 VEALLIVLALIGTLKASKQKRGLKWV--YLGAALGVLASVVTAIMLQFLF      48
                2                3                3
A_Sequence      48 PA-----EWLLGFLGLIPILM--GVKLLIFGEKEDDDDLIENEIQKKTN      88
                ||      | | | :| : | | : : | :      : | : :| : |
B_Sequence      49 PALTSGNNREMLEGAVGIFAVFMMIGVGVWLH-SKANISAWQNYMEKQLN      97
                4                4
A_Sequence      89 VILK-----VAITTIATCGADNIGIYVPLFTQISPTN--IPILLVT      127
                :::      : : : : ||: | || : || | : ||
B_Sequence      98 LVMSTGSFVSMFALSFLAVFREGAETILFYVGILPNISLQNLLLGILAAV      147
                5                6
A_Sequence      128 FFIMMTLFCYLGYLLSKIPTIGNILE--KWSRYITAVVYIGLGIYILWES      175
                :|| | :: ||| | : : | : || | :| : | : | :
B_Sequence      148 LILMLAFVFI-KSSEKIP-IHRVFQLLTWTIYILAFKMLGVSIHALQLT      195
                7
A_Sequence      176 GTL-THL      181
                | ||:
B_Sequence      196 NALPTHV      202
#-----
===== FINISHED =====
Average Quality (AQ)      27.14 +/- 8.23
Standard score (Z):      13.0
Precise score (Z):      13.5
```



# Fig. S5C

```
# 1: A_Sequence: Aan1 (2.A.106.1.1 homologue)
# 2: B_Sequence: Sso1 (2.A.108.3.3 homologue)
# Matrix: EBLOSUM62
# Gap_penalty: 8.0
# Extend_penalty: 2.0

# Length: 82
# Identity:      28/82 (34.1%)
# Similarity:   47/82 (57.3%)
# Gaps:         2/82 ( 2.4%)
# Score: 104.0
#=====
A_Sequence      1  IAAILAMKHARLVIFLGAVSALAVMTVLSAAMGYALPPALMPRTYTHYASA      50
  ||||           :   : | : ||   : | : : : : : |   | | : |   || ||
B_Sequence      1  IAAIYHNIYKNNLPFIYAVLGVAIVLIPTFTLG-KLIYLVPLNIVLLASA      49
  1                               2                               3

A_Sequence      51  LLFFYFGCRMLKDASSMSGVSEELGEVEEE      82
  :: |||| |::: |   |   | : :: || : ||
B_Sequence      50  VILFYFGYRLIRSA-RRSFKGIKKKGEEKEE      80
#-----
===== FINISHED =====
Average Quality (AQ)      13.74 +/- 5.89
Standard score (Z):      15.0
Precise score (Z):      15.3
```
