# Supplementary material for: The LysE Superfamily of Transport Proteins Involved in Cell Physiology and Pathogenesis
Source: PubMed Central journal article supplement (PMC4608589; doi:10.1371/journal.pone.0137184), 2015-10-16
Supplement: pone.0137184.s006.pdf [file pone.0137184.s006.pdf]

# Fig. S6A

```
# 1: A_Sequence: Pre2 (2.A.76.1.5 homologue)
# 2: B_Sequence: Lfr1 (2.A.109.1.3 homologue)
# Matrix: EBLOSUM62
# Gap_penalty: 8.0
# Extend_penalty: 2.0

# Length: 120
# Identity:      39/120 (32.5%)
# Similarity:   55/120 (45.8%)
# Gaps:        16/120 (13.3%)
# Score: 91.0
#=====
          1                               2
A_Sequence 1 NFWTYLAGLVLIIVPGPNSLYVLKTSTS-SGTRFGYRAAL--GVFTGDG 47
          | | : | | : : | | | : | | : |
B_Sequence 1 NDWLIIFSLVVIECLLSVDNAVVLAAQTQVLPTKKWQEESLFYGMW-GAY 49
          1                               2

          3
A_Sequence 48 ILIFLSFIGV-ASVIKASPTLFMIVRYLGAAYLLYLGCKILYSTFM--HK 94
          | | | | | : | | | | | | | | | | | | | | | |
B_Sequence 50 IFRFL-IIGVGVYLIK-----FWIKVLGAAYLFYLASFFYNMHQNRHK 93
          3

A_Sequence 95 KSNQDGTDTISIKTENHFTR 114
          | | : | : : | | |
B_Sequence 94 KSH---THQVKPNKKNHTRR 110
#-----
===== FINISHED =====
Average Quality (AQ)      13.27 +/- 5.74
Standard score (Z):      14.0
Precise score (Z):      13.5
```

# Fig. S6B

```
# 1: A_Sequence: Osp1 (2.A.77.1.1 homologue)
# 2: B_Sequence: Bsp1 (2.A.109.1.3 homologue)
# Matrix: EBLOSUM62
# Gap_penalty: 8.0
# Extend_penalty: 2.0
```

```
# Length: 118
# Identity:      36/118 (30.5%)
# Similarity:   60/118 (50.8%)
# Gaps:        11/118 ( 9.3%)
# Score: 104.0
#=====
```

|            |    |                         |                           |                               |                    |
|------------|----|-------------------------|---------------------------|-------------------------------|--------------------|
|            |    | 1                       |                           | 2                             |                    |
| A_Sequence | 1  | <b>SIDYIVIL--VVL</b>    | <b>FAQNERRKRAVRD</b>      | <b>IFLGQYIGFTILIAISLLAAFG</b> | <b>LT</b>          |
|            |    |                         | :   : : :       : :       |                               | :                  |
| B_Sequence | 1  | <b>SIDNAAMLAS</b>       | <b>MIMKLLKEDRKKALKYGI</b> | <b>FGAYF-FR---</b>            | <b>GISLI--FASI</b> |
|            |    | 1                       |                           | 2                             |                    |
|            |    |                         | 3                         |                               | 4                  |
| A_Sequence | 49 | <b>LIPQHWIGLL-GLVPI</b> | <b>FIGLKVLF</b>           | <b>EKE--DDDDQEEIIDTNR</b>     | <b>FTSFILSV</b>    |
|            |    |                         | :         : :     :   :   | : : :                         | :   :              |
| B_Sequence | 45 | <b>LIKIWWL</b>          | <b>KLLGGLYLVYIGISHFF</b>  | <b>KKLIKNSKKNII</b>           | <b>LNSFWKIISI</b>  |
|            |    |                         | 3                         |                               | 4                  |
| A_Sequence | 96 | <b>AVIMLAAGGDN</b>      | <b>LVYIPY</b>             |                               | 113                |
|            |    | : :                     | :   :                     |                               |                    |
| B_Sequence | 95 | <b>EIMDLTFSIDNIF</b>    | <b>FATIAF</b>             |                               | 112                |

```
#-----
===== FINISHED =====
Average Quality (AQ)      16.41 +/- 6.46
Standard score (Z):      14.0
Precise score (Z):      13.6
```

# Fig. S6C

```

# 1: A_Sequence: Pfr1 (2.A.75.1.1 homologue)
# 2: B_Sequence: Rpa3 (2.A.109.1.5 homologue)
# Matrix: EBLOSUM62
# Gap_penalty: 8.0
# Extend_penalty: 2.0

# Length: 103
# Identity:      31/103 (30.1%)
# Similarity:   51/103 (49.5%)
# Gaps:         11/103 (10.7%)
# Score: 112.0
#=====
A_Sequence      3      4
1 YLCWFAWRSFRSALRPQSD--DALTGQGPDAGALRPIVGTTL-ALTWLNP 47
  ::||  ||  ||  :  :|  |||  |  :||  |  :|  :  :|  :
B_Sequence      3      4
1 WVCWKMWRELRSQSQHDADALDALNDDGTASGAPRKTLQAVWQITLADI 50
  3      4

A_Sequence      5
48 HVYLDTMVMLGGLANQHPGLTRWAFAGGAMLGSALWFAALGLGARALSRP 97
  :  ||  ::  :  |  |  :||  :  :  |  ||  |  :||  |  :::
B_Sequence      5
51 SMSLDNVLAVAGAAREHPII-----LVFGLALSIALMGLAASFIAKL 92
  5

A_Sequence      98 LSK      100
      |  |
B_Sequence      93 LQK      95
#-----
===== FINISHED =====
Average Quality (AQ)      16.06 +/- 6.58
Standard score (Z):      15.0
Precise score (Z):      14.6

```

# Fig. S6D

```
# 1: A_Sequence: Lmi1 (2.A.107.1.1 homologue)
# 2: B_Sequence: Ddo1 (2.A.109.5.1 homologue)
# Matrix: EBLOSUM62
# Gap_penalty: 8.0
# Extend_penalty: 2.0
```

```
# Length: 188
# Identity:      48/188 (25.5%)
# Similarity:   94/188 (50.0%)
# Gaps:        29/188 (15.4%)
# Score: 132.0
#=====
```

|            |     |                                                     |     |
|------------|-----|-----------------------------------------------------|-----|
| A_Sequence | 1   | LSQALGIGILFGV---VEATTPLIGWLLGSAASRFVASIDHWVAFVLLAG  | 47  |
| B_Sequence | 1   | LAMGMRIALLFGISWLVALSAPF--WHIN--ASWITGGIS-WQAVILIAG  | 45  |
| A_Sequence | 48  | LG IHMVWKS FQPLEPCDDQTDAPYDTGVQLGADGSALRTGRLLPAGLLS | 97  |
| B_Sequence | 46  | -GIFLIWKS VHEIHEKVD-----ETGLE--EEEISKKSSTTLGNAIVQ   | 85  |
| A_Sequence | 98  | MLLTSVATSIDAM--AVGVTLAFVDVPIGOVALVIGLCTTMMVTLGVML-  | 144 |
| B_Sequence | 86  | IAVINLVFSFDSILTAVGMTNGLSDNPTD--ALII-MVIAVVISVGIMML  | 132 |
| A_Sequence | 145 | -GRLLGTLVGRR--AEMLG GIVLIVIGTVILYE--HLA             | 177 |
| B_Sequence | 133 | FANPVGNFIAKHP SLQILGLSFLIILIGFM LIAEGAHL S          | 170 |

```
#-----
===== FINISHED =====
Average Quality (AQ)      26.22 +/- 7.83
Standard score (Z):      14.0
Precise score (Z):      13.5
```

# Fig. S6E

# 1: A\_Sequence: Npe1 (2.A.108.2.1 homologue)  
# 2: B\_Sequence: Cte1 (2.A.109.1.3 homologue)  
# Matrix: EBLOSUM62  
# Gap\_penalty: 8.0  
# Extend\_penalty: 2.0

# Length: 202  
# Identity: 57/202 (28.2%)  
# Similarity: 91/202 (45.0%)  
# Gaps: 19/202 ( 9.4%)  
# Score: 125.0

```
#####  
A_Sequence      1 SSFVAAFTILVREGLEAI---LIVIAMITFLAKADRRDVLPHYVHGGWIAA 47  
  | | : | :: | || | ::  : : | : | : | | | : | : |  
B_Sequence      1 SLLVIFNLIVIEGLLSVDNAAVLATMVLDLPQKQRPAALTY---GILGA 47  
          1                2  
  
A_Sequence     48 -LFAGAGTWAAATWLITISGASRELTEGGVFAALVLLWGIWMH-GKS 95  
  | | | : | | : | : | : | | | | : : | | : | : | : |  
B_Sequence     48 YLFRGLFLFFAA-FLV-----SAWWLRPFGGLY-LLYLVW-NWWNNRGSK 89  
          3  
  
A_Sequence     96 NADAWQRYIRD-KLGRALNRRSAWFLFALAFIVVYREVFETILFYAAIWS 144  
  : | | : | | : | : | | : | : : | : | : | : | : | : |  
B_Sequence     90 DGDAMCTEKRDNRLYRFVSRRIGPFWATVLFVEMDIAFSIDNVFAAVAF 139  
          4  
  
A_Sequence    145 QGNGGAVVAGAFAAIAVLAVIAFVMLRHSRTLPIGKFFAYSSALIAVLAV 194  
  | | | | | | | : : : : | : | | : : | | : | : | : | : |  
B_Sequence    140 TDNLILVCTGVFIGILVMRFVAYGFIRLMEEYPFLESCAY--IVLAVLGL 187  
          5                6  
  
A_Sequence     195 VL      196  
  |  
B_Sequence     188 RL      189  
#####  
===== FINISHED =====  
Average Quality (AQ)      22.32 +/- 7.82  
Standard score (Z):      13.0  
Precise score (Z):      13.1
```

# Fig. S6F

```
# 1: A_Sequence: Ptr2 (2.A.106.1.1 homologue)
# 2: B_Sequence: Lga1 (2.A.109.1.3 homologue)
# Matrix: EBLOSUM62
# Gap_penalty: 8.0
# Extend_penalty: 2.0
```

```
# Length: 194
# Identity:      53/194 (27.3%)
# Similarity:   85/194 (43.8%)
# Gaps:        31/194 (16.0%)
# Score: 111.0
```

```
#####
A_Sequence      1 GGFWNAFTSSVAMI IATEIGDKTFFIAA---VLSMK-HSRSAVFFGAILA      46
| |           : : | |           : || | | | | | | | | : : : | :
B_Sequence      1 GQDWMMILTLILMECLLSV-DNAVVLAAQTQVLPKDEQRKSLVYG-LWG      48
| |           : : | |           : || | | | | | | | | : : : | :
A_Sequence      47 LIVMTVLSTAMGMLPNFIPKEYTHLLGGLLFLYFGCKLIYDSRQMEAGK      96
: :           : : | | | | | | | | | | | | | | | | | | | |
B_Sequence      49 AYLFRFIVIGIGTYLINFWE---IKLLGGLYLLYLVIKYFYDVRHP-----      91
| |           : : | | | | | | | | | | | | | | | | | | | |
A_Sequence      97 TSEELEEVEEELLQOGKKKADLEEGSRSNRPPSKQMGNQVV-IQSLTL      145
: | : :       : | | : | : : : : : : : : : : : | | : | : :
B_Sequence      92 -----AQVAKK--EAAKKEAHKKKNSKTRK--HHLSLFWRTVISIESMDI      132
| |           : : | | | | | | | | | | | | | | | | | | | |
A_Sequence     146 TFVAEWGDRSQTIALAASKNPIGVTIGGCVGHSLC-TGLAVV      188
| :           : | | | | | | | | | : | | : | | | | | | |
B_Sequence     133 VFSID---SVLA--ALAMSNPVVVLVGGMIG-ILCMRGVAEV      169
| |           : : | | | | | | | | | : | | : | | | | | | |
#####
```

```
#-----
===== FINISHED =====
Average Quality (AQ)      13.76 +/- 5.99
Standard score (Z):      16.0
Precise score (Z):      16.2
```
