# Supplementary material for: The LysE Superfamily of Transport Proteins Involved in Cell Physiology and Pathogenesis
Source: PubMed Central journal article supplement (PMC4608589; doi:10.1371/journal.pone.0137184), 2015-10-16
Supplement: pone.0137184.s007.pdf [file pone.0137184.s007.pdf]

# Fig. S7A

```
# 1: A_Sequence: Spl1 (2.A.75.1.1 homologue)
# 2: B_Sequence: Ogr1 (2.A.95.1.3 homologue)
# Matrix: EBLOSUM62
# Gap_penalty: 8.0
# Extend_penalty: 2.0
```

```
# Length: 157
# Identity:      50/157 (31.8%)
# Similarity:   74/157 (47.1%)
# Gaps:        14/157 ( 8.9%)
# Score: 124.0
```

```
#=====
          1                               2
A_Sequence 1 LIVAIGAQNTFV-LTQGI RKHRFVVALICSL-CD AF LISAGVAG--LGS 46
          :| || || || || |||: : | :|: :| | | :| | |
B_Sequence 1 IIDPIGLTPLFVAL TQGM PDRQRRAIAVRATLVAVAVLLAF AVFGEALLG 50
          1                               2

          3
A_Sequence 47 LIEQSP TLRLLAGGGALFLFIYGLKCLFSALQAEQEL GETESNPTSRRQ 96
          : | | | | : ||| : ||: | || | | | : | : | : ||
B_Sequence 51 FVGISMAAFRIAGG--- VLLFLTALDMLF QRRQARRE--DTADDP TEDPS 95
          3

          4                               5
A_Sequence 97 VILTILAI-TLCNPNVYLD TVVLLGGISATFVGQGRYLFGAGAI SMSFIW 145
          | | | | | | : | :| | | | : | | | : : :
B_Sequence 96 VF--PLAIP LLAGPGA-IATIILLTGQ SESVAGFAAVL-GVMVA LTIVF 141
          4                               5

A_Sequence 146 FFILSYG 152
          | | : |
B_Sequence 142 LFFLAAG 148
#-----
===== FINISHED =====
Average Quality (AQ)      20.31 +/- 7.39
Standard score (Z):      14.0
Precise score (Z):      14.0
```

# Fig. S7B

```
# 1: A_Sequence = Pag1 (2.A.76.1.2 homologue)
# 2: B_Sequence = Cba1 (2.A.95.1.4 homologue)
# Matrix: EBLOSUM62
# Gap_penalty: 8.0
# Extend_penalty: 2.0
```

```
# Length: 167
# Identity: 44/167 (26.3%)
# Similarity: 79/167 (47.3%)
# Gaps: 15/167 ( 9.0%)
# Score: 115.0
```

```
#=====
1 1 ALVHLVALMSP-GPDDFFVS-QTAASRSRKEAMMGVLGITLGIVWAGV- 47
  : : |:|:|:| | | |:| | : | : : |:: | | |:
B_Sequence 1 SFISLLALINPIGAIPIFFISLT1TQQT2EEEKRHTIKIAAISVATVV--GIS 48
1 48 ALMGLHLILEKMAWLHQVIMVGGGLYLLWGWQLMCSARQRHKQPQODEP 97
|:| | :| : | | | | | | : : : | | :|
B_Sequence 49 ALLG-QQIIIEFFNISVASLQVGGGLIMIMAMNMLNAQTSRTKATPEED 97
3
4 98 VVELPKRGM4SFLKGLL4TNLSNPKAI4IYFGSVFSLFV4GDDVGS4AERWGLFL 147
| | : : | | : | | : : | | : | |
B_Sequence 98 EAE-AKASIAVVPLALPLL4TGP-----GSISTVIV--YAGKTQHWYQLL 138
4
5 148 LIIGETFAWFALVAAIF 164
: : | | | : | : |
B_Sequence 139 ILVGIGVALGAVVYIVF 155
5
```

```
#-----
===== FINISHED =====
Average Quality (AQ) 17.31 +/- 6.50
Standard score (Z): 15.0
Precise score (Z): 15.0
```

# Fig. S7C

```
# 1: A_Sequence: Msp1 (2.A.77.1.4 homologue)
# 2: B_Sequence: Orf7 (2.A.95.1.4 homologue)
# Matrix: EBLOSUM62
# Gap_penalty: 8.0
# Extend_penalty: 2.0
```

```
# Length: 152
# Identity:      42/152 (27.6%)
# Similarity:   68/152 (44.7%)
# Gaps:         9/152 ( 5.9%)
# Score: 97.0
#=====
```

|            |    |                                                                                       |     |
|------------|----|---------------------------------------------------------------------------------------|-----|
| A_Sequence | 1  | <b>FLLAAFFANPEFRAKDVVLGQYLGFI<del>VLLT</del>--ISSLAYFVQF--IIPSNW</b>                  | 46  |
| B_Sequence | 1  | <b>FLAVTTGONPQKRRRTARKASLTAFVVLTTFAIAGTFIFKMFGITLP<b>AFE</b></b>                      | 50  |
|            |    | 1 2                                                                                   |     |
| A_Sequence | 47 | <b>ISLLGVIPIMIGIRSFLHLKK-PQTDYSGENRDFSKYKEGQ<b>MLPVT</b>LVT</b>                       | 95  |
| B_Sequence | 51 | <b>IA-GGVILLLIGL-DMLEAKRSPTQESSGETAE<b>AAS-KEDV</b>GIVPLG<b>IPM</b></b>               | 97  |
|            |    | 3 4                                                                                   |     |
| A_Sequence | 96 | <b>LANGGDNLGVY<b>MPLFAS</b>MGPFDL-<b>FLTAIIF</b>LIMVGV<b>WCFL</b>GYKLVN<b>NRV</b></b> | 144 |
| B_Sequence | 98 | <b>LAGPGAITSV<b>MVLV</b>GQAQNPWQ<b>VTII</b>AAIAITAV<b>SCYV</b>VLGAA<b>TRVARI</b></b>  | 147 |
|            |    | 5                                                                                     |     |

|            |     |    |     |
|------------|-----|----|-----|
| A_Sequence | 145 | LG | 146 |
|            |     |    |     |
| B_Sequence | 148 | LG | 149 |

```
#-----
===== FINISHED =====
Average Quality (AQ)      13.03 +/- 5.85
Standard score (Z):      14.0
Precise score (Z):      14.4
```

# Fig. S7D

```

# 1: A_Sequence: Asu1(2.A.107.2.1 homologue)
# 2: B_Sequence: Csh1(2.A.95.1.5 homologue)
# Matrix: EBLOSUM62
# Gap_penalty: 8.0
# Extend_penalty: 2.0

# Length: 124
# Identity:      33/124 (26.6%)
# Similarity:   64/124 (51.6%)
# Gaps:         6/124 ( 4.8%)
# Score: 108.0
#=====
A_Sequence      1 YISEFDHWIA-FALLCVIGINMIKMSVTNENSDDDDPSD--FSL-RHLTML      46
   :||      ||      :| :| :| :|      :| | | :| | :| :| :|
B_Sequence      1 HLSETSLGIAGGVILFLIALRMV-FPAPHGNGADHPAEPFVVPLAIPLI    49
   :||      ||      :| :| :| :|      :| | | :| | | | | :|
                                     3           4
A_Sequence      47 GVATSIDALAMGVSFAFFLKVNIWTAAAIIGITTTILSL-FGVKAGHWLGD    95
   :| :| :| :| :| :| :| :| :| :| :| :| :| :| :| :| :| :|
B_Sequence      50 AGPSALATVLLLVSREPARLWEWVAALALTMVVCALTLAFAEKISHWLGE    99
   :| :| :| :| :| :| :| :| :| :| :| :| :| :| :| :| :| :|
                                     5
A_Sequence      96 RIHKQAE LLGGI ILLIAMGVKVLIE      119
   | :| :| :| :| :| :| :| :| :| :| :| :| :| :| :| :| :|
B_Sequence      100 RVTTAFERLMGLVLTAVQMLLD      123
   :| :| :| :| :| :| :| :| :| :| :| :| :| :| :| :| :| :|
                                     6
#-----
===== FINISHED =====
Average Quality (AQ)      16.70 +/- 6.06
Standard score (Z):      15.0
Precise score (Z):      15.1

```

# Fig. S7E

```
# 1: A_Sequence: Gka1 (2.A.109.1.5 homologue)
# 2: B_Sequence: Dgil (2.A.95.1.5 homologue)
# Matrix: EBLOSUM62
# Gap_penalty: 8.0
# Extend_penalty: 2.0
```

```
# Length: 106
# Identity:      29/106 (27.4%)
# Similarity:   52/106 (49.1%)
# Gaps:         6/106 ( 5.7%)
# Score: 93.0
```

```
#=====
          1                               2
A_Sequence  1  LIIGIDVILGGDNAVVIALAS-RNLPEQKRNVAIIVGTALAIAVRIVLTV  49
          | : : : | : : | | : : | | : : | : | : | :
B_Sequence  1  LAVPLFLIMDGLGNVPVCMSMLRRFPPRRQRIIFRELCFALAISILFCF  50
          1                               2

          3
A_Sequence  50 AVVWLLTI----P-FLQLAGGVLFWIALKLIGQKDEKPTMIKAEPSLWK  94
          ||| | | | | | | | | | | | | | | | | | | | | | | | | | | |
B_Sequence  51 FGDWLLKFLGLGPSTLRLAGGVLFVISMRMVFPDESKETADPEDPSALA  100
          3

          4
A_Sequence  95 AIQTIV 100
          | : :
B_Sequence  101 AEEPFI 106
          4
```

```
#-----
===== FINISHED =====
Average Quality (AQ)      12.39 +/- 5.29
Standard score (Z):      15.0
Precise score (Z):      15.2
```
