# Supplementary material for: The LysE Superfamily of Transport Proteins Involved in Cell Physiology and Pathogenesis
Source: PubMed Central journal article supplement (PMC4608589; doi:10.1371/journal.pone.0137184), 2015-10-16
Supplement: pone.0137184.s008.pdf [file pone.0137184.s008.pdf]

# Fig. S8A

```

# 1: A_Sequence: Aur1 (2.A.76.1.2 homologue)
# 2: B_Sequence: Bc01 (2.A.113.1.9 homologue)
# Matrix: EBLOSUM62
# Gap_penalty: 8.0
# Extend_penalty: 2.0

# Length: 209
# Identity:      52/209 (24.9%)
# Similarity:   93/209 (44.5%)
# Gaps:        18/209 ( 8.6%)
# Score: 128.0
#=====

```

|            |                                                                               |     |     |
|------------|-------------------------------------------------------------------------------|-----|-----|
|            | 1                                                                             | 2   |     |
| A_Sequence | 1 <u>FIALITLMFIQFCALITPGPDFFLVS</u> QT AISRSRREAV <u>FVVLGITVGVMF</u>         |     | 50  |
|            | : :     :     :     : :   :   :                                               |     |     |
| B_Sequence | 1 <u>FISVLALGFVLGIKHAIE</u> -PDHIIAVSTIASRSKKLSQSS <u>LAGVFWGIGH</u>          |     | 49  |
|            | 1                                                                             | 2   |     |
|            |                                                                               | 3   |     |
| A_Sequence | 51 <u>WAILALMGLNIIFEK</u> ----MAWLKQ <u>ILLVIGGIYLCWLGFM</u> LRSAFSKQ         |     | 96  |
|            | : :   :   :   :     :       :       :                                         |     |     |
| B_Sequence | 50 <u>TATLFIVGICLLII</u> KGEIPEKW <u>AMSLEFLV-GIMLVYLGITTL-SAF</u> KRV        |     | 97  |
|            |                                                                               | 3   |     |
|            |                                                                               | 4   |     |
| A_Sequence | 97 KVQNTNTPIDLPKTETKF-FLKGLLTNLSNPK <u>AVIYFGS-VFSLEFLANPA</u>                |     | 144 |
|            | ::     : :   : : : :   : :         :                                          |     |     |
| B_Sequence | 98 RI---NHHYHEPGHKRNYSIK <u>SVCIGFVHGLA</u> ---- <u>GSGAMVLLTMSTV</u>         |     | 140 |
|            |                                                                               | 4   |     |
|            |                                                                               | 5   |     |
| A_Sequence | 145 <u>LDHVH</u> <u>SLLFIII-AVETLIWFLEVVVFSL</u> PSFKSAYQ-NVAK <u>WIDGVSG</u> |     | 192 |
|            | : :   :   :     : :     :     : :                                             |     |     |
| B_Sequence | 141 KSVVESAI <u>YILIFGIGTIFGMLFFTTILGIPFI</u> ISAKKVEVNKTLTQ <u>ITG</u>       |     | 190 |
|            |                                                                               | 5   |     |
|            |                                                                               | 6   |     |
| A_Sequence | 193 <u>GIFTAFGIY</u>                                                          | 201 |     |
|            |                                                                               |     |     |
| B_Sequence | 191 <u>AISTVFGIY</u>                                                          | 199 |     |
|            |                                                                               | 6   |     |

```

#-----
===== FINISHED =====
Average Quality (AQ)      23.09 +/- 7.61
Standard score (Z):      14.0
Precise score (Z):      13.8

```

# Fig. S8B

```

# 1: A_Sequence = Acy3 (2.A.77.1.4 homologue)
# 2: B_Sequence = Gar1 (2.A.113.1.9 homologue)
# Matrix: EBLOSUM62
# Gap_penalty: 8.0
# Extend_penalty: 2.0

# Length: 195
# Identity:      55/195 (28.2%)
# Similarity:   94/195 (48.2%)
# Gaps:         23/195 (11.8%)
# Score: 129.0
#=====
                1                               2
A_Sequence    1 NIITPILTGV-FAFI-ATNIDDIVILLVFFSQVNEN--FRPWQIVMGQYL    46
                : :  :| | : | | | : : | | : | | : | : |
B_Sequence    1 DFLAAVLTGIMFGIIHAFDVDHIVAMATFSEQKNKNQILTYAFKWGTGH    50
                1                               2

                3
A_Sequence    47 GFTILVIFSLPGFFGLILPPANIG---LLGLIPIGIGISSLVNKEKEQ    92
                | | | : : | | | : : : : : | : : | | : :
B_Sequence    51 G-GILLLLGMLLIFIGFQLPNWFVHYSEIMVGVLLIYLGVKLLVLLHRKG    99
                3

                4
A_Sequence    93 LADVPEEIISPATSINNYSLTPQIYTVAAITVANGSDNISIYIPLFSSIS    142
                | | | : | | : | | : : | : : | : : | : :
B_Sequence    100 TFSVPESLDLAARSLNKHDHTP-LF---IGMLHGVAGSAPLLALLPNML    144
                4

                5                               6
A_Sequence    143 FNSFLLIIGLFF---LLGVWC--YV---AYQL-THQK---KVADFFT    178
                | | | | | | | | : : | | : : | | | : | |
B_Sequence    145 ETQFLLHISLFSIGCLFGMFCFGYIFGSYQVYIKQKEKLAKAFT    189
                5                               6

#-----
===== FINISHED =====
Average Quality (AQ)      18.67 +/- 7.32
Standard score (Z):      15.0
Precise score (Z):      15.1

```

# Fig. S8C

```

# 1: A_Sequence: Bdi1 (2.A.109.1.5 homologue)
# 2: B_Sequence: Cull1 (2.A.113.1.9 homologue)
# Matrix: EBLOSUM62
# Gap_penalty: 8.0
# Extend_penalty: 2.0

# Length: 196
# Identity:      55/196 (28.1%)
# Similarity:   83/196 (42.3%)
# Gaps:         19/196 ( 9.7%)
# Score: 117.0
#=====
A_Sequence      1 ASALGKVLMIDLVLAGDNAVAVGLAAAALPQEQRRKAILIGLA-----AA      45
| :| :| : | | :||| : || : : || |
B_Sequence      1 AMGIGILLGLRHALDADHVAV--STMALEERNLLRGGWIGFCWGVGHAL      48
                                1                2

A_Sequence     46 VVMRIGLALIT--VQLLAIVGLLLAG--GFLLLWVCWKMWRELREQATHD      91
|: | ||| :| :|| | | | :| : : || :| |
B_Sequence     49 VLFLFGGALILSGIRLPEVVGRWLEGGVGVMLILIALGSWRRMRRSKLHI      98
                                3

A_Sequence     92 QAEAEAEIERAMAIEHGGGPSPEEL----GLK-RKTFGAALIQIMIADLT      136
: : || | | | | | | | :| : :
B_Sequence     99 HVH-QHDGERYHTHFHVHDDSPRHLEKHHGWKGSHSFLIGTVHGLAGTGA      147
                                                                4

A_Sequence    137 MSLDNVLAVAGASHEHPWIMVFGL--ILSIALMGLAATFIAKLLNR      180
: : : ||: : : ||| |||: | |: | | ||||
B_Sequence    148 VMVLTIAAVSDPLQRIAYLASFGLGTILSMTLFSLSLTLITKLLNR      193
                                                                5

#-----
===== FINISHED =====
Average Quality (AQ)      18.97 +/- 7.06
Standard score (Z):      14.0
Precise score (Z):      13.9

```

# Fig. S8D

```

# 1: A_Sequence: Mfo1 (2.A.95.1.4 homologue)
# 2: B_Sequence: Orf5 (2.A.113.2.1 homologue)
# Matrix: EBLOSUM62
# Gap_penalty: 8.0
# Extend_penalty: 2.0

# Length: 128
# Identity:      33/128 (25.8%)
# Similarity:   66/128 (51.6%)
# Gaps:        11/128 ( 8.6%)
# Score: 109.0
#=====

A_Sequence      1 FKIAWDLHAEMSKTKHSPREEIDMRMGSVAVVPLAIPLLAGPGAITTTI      50
  : : | : ||| : : : | | : | : : | | : ||||| :
B_Sequence      1 YQDAHERQHAEDIRRRFAGRE---VTGQIILFGLTGGLIPCPGAITVLL      47
                                           4

A_Sequence      51 ILME-KAQSLANKTI VISSI--ILTMIVSGLILSASDIVVKKLVSGINA      97
  : : : | : | : : : || ||| : || : : : | : : : || :
B_Sequence      48 LCLQLKRVALGSVLVLCFSIGLALTMVASG-VIAALSSVKYAERRFSGFGS      96
                                           5

A_Sequence      98 IVR----IMGLILAAISVQIIFSGAYGL      121
  : || | | : : : : : | | : |
B_Sequence      97 LVRKAPYASGLVILCVGLYVALSGWHSL      124
                                           6

#-----
===== FINISHED =====
Average Quality (AQ)      18.86 +/- 6.66
Standard score (Z):      14.0
Precise score (Z):      13.5

```
