# Supplementary material for: The LysE Superfamily of Transport Proteins Involved in Cell Physiology and Pathogenesis
Source: PubMed Central journal article supplement (PMC4608589; doi:10.1371/journal.pone.0137184), 2015-10-16
Supplement: pone.0137184.s009.pdf [file pone.0137184.s009.pdf]

# Fig. S9A

```

# 1: A_Sequence: Hgr1 (2.A.76.1.5 homologue)
# 2: B_Sequence: Ssp3 (2.A.116.1.7 homologue)
# Matrix: EBLOSUM62
# Gap_penalty: 8.0
# Extend_penalty: 2.0

# Length: 188
# Identity:      60/188 (31.9%)
# Similarity:   91/188 (48.4%)
# Gaps:        27/188 (14.4%)
# Score: 138.0
#=====
          1                               2
A_Sequence  1  IGIVLLPGPNSLFVLSVATA-RGVRVGYHAACGVF----LGDSILL-LFT      44
          : | :: | | : : :| | | | | | | | | | | | | | | | | : | : |
B_Sequence  1  LAITMAGPQIMSAVILATAQRAVRVSLGFVTGVLIATSLGVAIMLGIAT      50
          1                               2
          3
A_Sequence  45  ALGAA---SLLRGYPALFMVVKYVGAAYLFWVGMNLAWSAWRKWRAAGIA      91
          ||| |           :: |::| | | | | | | | | | | | | | | |
B_Sequence  51  ALGGAVDFGSSGDKSSVGRVIQYVLVALLI-----LA--ALRNWR----K      89
          3
          4
A_Sequence  92  TQLVEPTA-LAAAQSAHLLAPFORALVISLLNPKAILFLLSFFVQFIDPA      140
          : ||| | | | | | | | | | | | | | | | | | | | | | | |
B_Sequence  90  RETVEPPKWLHALMSADTRKAFETGLLVVLLMPSDLMVMLTVGVH-LDOG      138
          4
          5
A_Sequence  141 YDT--PAIPFLILSVIVMAFSAVYLSVLIVAGARLADA      176
          : : |::|: |: :| | : : | | | : | | | |
B_Sequence  139 HSSFVDALPFIALTTLVAA-TPLLLRVLL--GRRAASA      173
          5
#-----
===== FINISHED =====
Average Quality (AQ)      26.84 +/- 7.65
Standard score (Z):      15.0
Precise score (Z):      14.5

```
