# Supplementary material for: The LysE Superfamily of Transport Proteins Involved in Cell Physiology and Pathogenesis
Source: PubMed Central journal article supplement (PMC4608589; doi:10.1371/journal.pone.0137184), 2015-10-16
Supplement: pone.0137184.s010.pdf [file pone.0137184.s010.pdf]

# Fig. S10B

```

# 1: A_Sequence = Sne3 (2.A.106.1.2 homologue)
# 2: B_Sequence = Orf5 (5.A.1.2.1 homologue)
# Matrix: EBLOSUM62
# Gap_penalty: 8.0
# Extend_penalty: 2.0

# Length: 161
# Identity:      52/161 (32.3%)
# Similarity:   82/161 (50.9%)
# Gaps:         22/161 (13.7%)
# Score: 130.0
#=====

                1                               2
A_Sequence      1 LLGIILAFLIVDGIAILAGEWITDIAPRELIKMLSGAIFI-IFLVTLIF      49
                  |:|  :|:  :  :|  |  :      ::|:  :  :|  |  |  |  |  |  |  |  |  |  |  |
B_Sequence      1 LVGFSVIFIFILGYSSSLVGTFFYQY--QDLLRQI-GAIFIVIFGLMILGF      47
                2                               3

A_Sequence      50 RNKREEIK-TKYHFEN-P--FYSGFI--LIFVSEWGDKTQIATG---LFA      90
                  :  :|  |  |  |:|  |  :  :  |  :  |  |  :  |  |  |  :  |
B_Sequence      48 FTPKFLMKEKKLQFKNRPAGYFGTFLIGLAFAAGWTPCTGPITGAVFEMMA      97
                2                               3                               4

A_Sequence      91 TQYNG-----LMVLTGVIIALSLLSVIAIYSGKFISDKVTRETLTKLTG      134
                  |  |  |  |  |  |  |  |  |  |  |  |  |  |  |  |  |  |  |  |  |  |  |
B_Sequence      98 AQNPGSGMWYMLVYVLGFAIPFFLLSIF-ITRVKWI-QKYNR-TITKVGG      144
                4                               5

A_Sequence      135 FLFISMGVLFF      145
                  :|  |  :  :  |  |  |
B_Sequence      145 YLMIALGILLF      155
                5                               6

#-----
===== FINISHED =====
Average Quality (AQ)      26.20 +/- 7.85
Standard score (Z):      13.0
Precise score (Z):      13.2

```

# Fig. S10C

```

# 1: A_Sequence: Cac1 (2.A.107.2.1 homologue)
# 2: B_Sequence: Dsp2 (5.A.1.2.1 homologue)
# Matrix: EBLOSUM62
# Gap_penalty: 8.0
# Extend_penalty: 2.0

# Length: 154
# Identity:      47/154 (30.5%)
# Similarity:   79/154 (51.3%)
# Gaps:        14/154 ( 9.1%)
# Score: 146.0
#=====
                2                               3
A_Sequence      1  FAISFGFFQFLCTFIGAYSGFLFNITYVPQIIGGMIIAFVGAFM---I      47
| : |   |   |   | : : |   |   |   : : : | : : | | : | | |
B_Sequence      1  FILGFSIIFFALGFSASWVGSFFSEYRDLI-RMLGGVLIAVMGLFMLGLI      49
                2                               3

                4
A_Sequence      48  KEGFDNKEEKLLLNFKMYFVLGISVSIDAAVVGFT-MFNKISSNYVILGD      96
| | | | : : : | : | : | | | | | : | | : : |
B_Sequence      50  KPGFMMKEKRLEVGKRKWGYLGSSVIGMAFAAGWTPCVGPILVSVLALAA      99
                4

                5                               6
A_Sequence      97  S-----VFIGIVTLLILSIIAFIISRYLKRIQLVCKYADYI---GGIILV      137
|   : |   | | : | | | : : : | | : : | | : : : | | : : |
B_Sequence     100  SNPSAGLAYITAYTLGFAIPFFIMAFFLGRTRWILKYSNSLMKAGGALMV      149
                5                               6

A_Sequence      138 IFGL      141
: | | :
B_Sequence      150 VFGV      153

#-----
===== FINISHED =====
Average Quality (AQ)      28.64 +/- 7.96
Standard score (Z):      15.0
Precise score (Z):      14.7

```

# Fig. S10D

```

# 1: A_Sequence: Pfu1 (2.A.95.1.4 homologue)
# 2: B_Sequence: Dto1 (5.A.1.2.1 homologue)
# Matrix: EBLOSUM62
# Gap_penalty: 8.0
# Extend_penalty: 2.0

# Length: 213
# Identity:      57/213 (26.8%)
# Similarity:   104/213 (48.8%)
# Gaps:         25/213 (11.7%)
# Score: 140.0
#=====
A_Sequence      1  GLFAITNP--IGAVPVFIAVTRNLSPEKRKEIARKTSTTVMVTLLLVFALV 48
  || :  :| :  :| :  :  || :: || | :| | :| | :
B_Sequence      1  GLLSFFSPCILPLI PAYFSFITGLSLDELKENKRQTRQKVFLS-TVFYVA 49
  1 2
A_Sequence      49 G-EWIFKFFGASTDAFS-----IAGGIILFRMSLEMLSSGKLSS 85
  | :|| ||| | |||| | :| | ::
B_Sequence      50 GFSFIFILFGASASFLGGLASQYAWVVRYIGGGIILV-FGLHLL-GIINI 97
  3
A_Sequence      86 VKIS-EEEEHISEEAVTLEEVAIIPLAIPLLSGP--GAITTTMLYMAKSS 132
  : |:: | : | : | : | : | : | : | : | : | :
B_Sequence      98 KGFNFEKKIHVKEKPLHLMGTFVIGMAFGAGWSPCIGPLLGSILIVAGNQ 147
  4
A_Sequence     133 TMIEKSIVLLVVVAIGITV-WIILSA-ANRIHQ--KLGTIGIKVMTRMMG 178
  : | : || | : | : | : || | | : | | | : | : : |
B_Sequence     148 ETVLKGVFLLAVYSAGLAVPFLILSVFINSILEIMKRATKFIRVLNKISG 197
  5
A_Sequence     179 LILASMAVQMVIN 191
  ::| :: : :| :
B_Sequence     198 ILLIAIGLLLLVFD 210
  6
#-----
===== FINISHED =====
Average Quality (AQ)      22.82 +/- 7.67
Standard score (Z):      15.0
Precise score (Z):      15.3

```

# Fig. S10E

```

# 1: A_Sequence: Sni1 (2.A.116.1.4 homologue)
# 2: B_Sequence: Psp5 (5.A.1.2.1 homologue)
# Matrix: EBLOSUM62
# Gap_penalty: 8.0
# Extend_penalty: 2.0

# Length: 194
# Identity:      46/194 (23.7%)
# Similarity:   97/194 (50.0%)
# Gaps:         15/194 ( 7.7%)
# Score: 117.0
#=====
A_Sequence      1 KPRPTSLAFLAGVVGVLVGLTVVFIEASSLAGGEQHTRPAWMSWVRIILG      50
      | | | : : | : : | : : | :
B_Sequence      1 KNSPNKLTVISQTVLFILGFSILFVLLGISVSTVSRLLESEHMRLVQQIGG      50
      | | | : : | : : | : : | :
      2                               3

A_Sequence     51 AALIVFGVYRF-VTRHR--HTEQPRWMPFAKLTPG-RAG--LTGVAVAV      94
      | : : | | : : : | : : : | : : | : : | : : | :
B_Sequence     51 ALIVVFGHLHMTGLLRIKLLYSEK-RYL-PSG--SPGKKAGALVLGMAFAV      96
      | : : | | : : : | : : : | : : | : : | : : | :
      4                               4

A_Sequence     95 VRPEVLALVATAGLEIGAGGLSTAGAWTCGVLFIAVAASTVAIPVLAYAI      144
      : : : | | | | : : | | | | : : | : : | | :
B_Sequence    97 GWTPCIGPILSSIL-IYAGSMATLGK---GVLLLSMYALGLAVPFLLSAV      142
      : : : | | | | : : | | | | : : | : : | | :
      5                               5

A_Sequence    145 AGERLDPTMARIKDWMDRNLGAMEAVVLVVIGLMVIEKGISSLS      188
      : | : : : : : | | : : : | : : : | : : | :
B_Sequence    143 LIDNLTAYLRKVTKHLPK-ISVASGVVMMLMGVLFVFTNQLVFS      185
      : | : : : : : | | : : : | : : : | : : | :
      6                               6

#-----
===== FINISHED =====
Average Quality (AQ)      21.78 +/- 7.27
Standard score (Z):      13.0
Precise score (Z):      13.1

```
