# Supplementary material for: The LysE Superfamily of Transport Proteins Involved in Cell Physiology and Pathogenesis
Source: PubMed Central journal article supplement (PMC4608589; doi:10.1371/journal.pone.0137184), 2015-10-16
Supplement: pone.0137184.s012.pdf [file pone.0137184.s012.pdf]

# Fig. S12A

# 1: A\_Sequence: Ssp2 TMS #1-3 (Q2JWH3 ; 2.A.106 homologue)

# 2: B\_Sequence: Ssp2 TMS #4-6

# Matrix: EBLOSUM62

# Gap\_penalty: 8.0

# Extend\_penalty: 2.0

#

# Length: 118

# Identity: 30/118 (25.4%)

# Similarity: 39/118 (33.1%)

# Gaps: 29/118 (24.6%)

# Score: 111.0

#

#

#=====

|            |     |                                      |                      |               |                 |     |
|------------|-----|--------------------------------------|----------------------|---------------|-----------------|-----|
|            |     |                                      |                      | 1             | ExGD(K/R) (T/S) |     |
| A_Sequence | 1   | -----                                | MWAGFASLLLVTV        | <b>EFGDKT</b> | FFTPLIL         | 28  |
|            |     |                                      |                      | :             | :               | :   |
| B_Sequence | 1   | EEEEALRLVEQAEAKGAGRGGAWAVVWEAFSLTALA | <b>EFGDKT</b>        | QIATVSL       |                 | 50  |
|            |     |                                      |                      | 4             | ExGD(K/R) (T/S) |     |
|            |     |                                      | 2                    |               | 3               |     |
| A_Sequence | 29  | AMRHPRRWVFLGTWLALAAMTLLAVVAGKVLFE    | LLPPLGVRVLSAGVFAA    |               |                 | 78  |
|            |     |                                      | :                    | :             | :   :           |     |
| B_Sequence | 51  | AATHPGLSVWAGATLGHGLMVGLAVVGGRF       | LAAHISERAVHWVGGGLFLL |               |                 | 100 |
|            |     |                                      |                      | 5             | 6               |     |
| A_Sequence | 79  | FGLRMLWQAYQMT                        | PQQEK                |               |                 | 96  |
|            |     |                                      | :                    |               |                 |     |
| B_Sequence | 101 | FALVTSWELLG                          | -----                |               |                 | 111 |

#-----

===== FINISHED =====

Average Quality (AQ) 19.10 +/- 6.83

Standard score (Z): 13.0

Precise score (Z): **13.5**

# Fig. S12B

```

# 1: A_Sequence: Tth1 TMS #1-3 (I7M883 ; 2.A.106 homologue)
# 2: B_Sequence: Tth1 TMS #4-6
# Matrix: EBLOSUM62
# Gap_penalty: 8.0
# Extend_penalty: 2.0
#
# Length: 172
# Identity:      34/172 (19.8%)
# Similarity:    58/172 (33.7%)
# Gaps:          48/172 (27.9%)
# Score: 102.0
#
#=====
A_Sequence      1 MKVLYILIIISFLLLSSINTKEPNNEKGNSSSEKSLNLSFNDDQILQSHGSF      50
                  : | | : | : || : || | : : : |
B_Sequence      1 -----NDLKEKSTSDKQNNQ-ANSQENEKKKKKKQIKGIAAPGYV      40

                  1 ExGD(K/R) (T/S) 2
A_Sequence      51 IG--SFISTSVS EIGDKT FIMTAILSSKYNRFWVFGSVGSMMLIMTLISC      98
                  | :|:| | ||: | | :|: | : |:|:| : |::
B_Sequence      41 IAMQTFVSNFFG EWGDKS QISTIAISASYDFVFLGTVVGGQIFCILLAL      90
                  4 ExGD(K/R) (T/S) 5

                  3
A_Sequence      99 LLGS-LTEYFIPLVYVKFISSALFLIFGLKMLYEVYTDTVDDDEDEAE     147
                  : | | : | : : ||:| | |
B_Sequence      91 IGGQVLAKQFSEKT-MALLGGILFIIFSFITLYTTLNK-----     127
                  6

A_Sequence      148 VEELEKRLSKIVTKPKTETDQN      169
B_Sequence      127 -----      127

#-----
===== FINISHED =====
Average Quality (AQ)      18.33 +/- 7.38
Standard score (Z): 11.0
Precise score (Z): 11.3

```

# Fig. S12C

```

# 1: A_Sequence: Tcr1 TMS #1-3 (K4DX00 ; 2.A.106 homologue)
# 2: B_Sequence: Tcr1 TMS #4-6
# Matrix: EBLOSUM62
# Gap_penalty: 8.0
# Extend_penalty: 2.0
#
# Length: 137
# Identity:      25/137 (18.2%)
# Similarity:   47/137 (34.3%)
# Gaps:        26/137 (19.0%)
# Score: 52.0
#
#=====
A_Sequence      1  -----MAIHATR1RW--TEGLLSS-FSMILVS1EIGDKTFFFIACLMAMRH      40
                | | | |      :: |:: |:: | |::      :|
B_Sequence      1  TGSISSTGAGCARRHWFAFHPVMAEVFALTFVA4EWGDRS3QLATIALAAAK      50
                2                               3
A_Sequence      41  SKVLVFLGAIGALAGMTVLSALMGLVVPVSVLSVRVTKMLAVVLF5FGFGGK      90
                : | : | : | | : : | | : | : | : : | | |
B_Sequence      51  NPFAVTIGGVLGHAVCTGVAVLCGNMTARYVSMRSVNIVGGGLFIVFALA      100
                5                               6
A_Sequence      91  ILYDEF5AKRGQGDAESDDEMTEAAAIIRKKDPND6AVE      127
                ||: | | : :
B_Sequence     101  TLYELITNTHHID-EMQQQKEK-----      121

#-----
===== FINISHED =====
Average Quality (AQ)      14.58 +/- 6.61
Standard score (Z): 6.0
Precise score (Z): 5.7

```
