# Supplementary material for: The LysE Superfamily of Transport Proteins Involved in Cell Physiology and Pathogenesis
Source: PubMed Central journal article supplement (PMC4608589; doi:10.1371/journal.pone.0137184), 2015-10-16
Supplement: pone.0137184.s013.pdf [file pone.0137184.s013.pdf]

# Fig. S13A

```

# 1: A_Sequence: Nps1 TMS #1-3 (Q8YX33 ; 2.A.108 homologue)
# 2: B_Sequence: Nps1 TMS #4-6,7
# Matrix: EBLOSUM62
# Gap_penalty: 8.0
# Extend_penalty: 2.0
#
# Length: 150
# Identity:      30/150 (20.0%)
# Similarity:    50/150 (33.3%)
# Gaps:         54/150 (36.0%)
# Score: 99.0
#
#=====
A_Sequence      1  -----MNWEIVLASFASLIELVEILGIVIVVGR1L-AGWRNALV      38
                   || |:| :|:| :|:| :|:| :|:| :| :| |:
B_Sequence      1  EQLARDENESGWNWFAVVTTFKGALLDSVEVVAIAVVTLGAAQSQWLEAIS      50
                   4 (D/E)xxE
                   2                               3
A_Sequence      39  GSGAGIALTLLLSLVLGKSLTLPVNILRIVAGVLLLLFGQKWTRSIVRY      88
                   |:| |:|:| :| :|:| :|:| :|:| :| :|
B_Sequence      51  GAGFATFSLLVLAFLFRTPLQQVPVKPMKFTAAMLLMGFGLYWLG-----      95
                   5                               6

A_Sequence      89  YAGLPKRRKGGGDSLE-----                          105
                   ||| :| | |
B_Sequence      96  -AGLNVEWPG---DELAIIWLPLAWGVGMAIASTIWRWRVSLDKPEEAIG      141
                   7

#-----

===== FINISHED =====
Average Quality (AQ)      20.11 +/- 7.38
Standard score (Z): 11.0
Precise score (Z): 10.7

```

# Fig. S13B

```

# 1: A_Sequence: Nps3 TMS #1-3 (K9Q6B8 ; 2.A.108 homologue)
# 2: B_Sequence: Nps3 TMS #4-6,7
# Matrix: EBLOSUM62
# Gap_penalty: 8.0
# Extend_penalty: 2.0
#
# Length: 151
# Identity:      30/151 (19.9%)
# Similarity:   47/151 (31.1%)
# Gaps:        58/151 (38.4%)
# Score: 96.0
#
#=====
A_Sequence      1  -----MNWEIFLASFVGSLELVEILGLVLLIVGKLAG-WRNA      36
                   ||           :| |:|:: ||: |:::| | | |
B_Sequence      1  LETELANTGNQLGWNWFATTFKGA4LLDSVEVAIAVVTLGATGGKWLEA      50
                   4 (D/E) xxE

A_Sequence      37  FVGA-GSGIGLTL2LASLILGTS3LTIIIPVDILRIVAGVFLLAFGQKWTRSI      85
                   || : || ::| : | | :|: :: | :|: || |
B_Sequence      51  AGGASAAAFGLVVVA-FLFRTPLNQVPIKPMKFTAAMLLMGFGIYWLSE-      98
                   5                               6

A_Sequence      86  VKYYAGIPKKRKDEEDD-----                          102
                   | | | |
B_Sequence      99  -----GF--KIKLPGDDWAI7VWLP7IVWGCLMAVSALLLRWQVGLQPKEIV      141
                   7

A_Sequence      102 -      102
B_Sequence      142 S      142

#-----
===== FINISHED =====
Average Quality (AQ)      21.97 +/- 7.85
Standard score (Z): 9.0
Precise score (Z): 9.4

```

# Fig. S13C

```

# 1: A_Sequence: Rsp3 TMS #1-3 (J2KV33 ; 2.A.108 homologue)
# 2: B_Sequence: Rsp3 TMS #4-6,7
# Matrix: EBLOSUM62
# Gap_penalty: 8.0
# Extend_penalty: 2.0
#
# Length: 140
# Identity:      37/140 (26.4%)
# Similarity:   56/140 (40.0%)
# Gaps:         30/140 (21.4%)
# Score: 84.0
#
#=====
A_Sequence      1 MTTITSITSTMA--ASFLGSFVEVVEAFTIILAVGVTQSWRPAFIGTGLA      48
                  :      |:|      :| ||      |::| |      | : | |
B_Sequence      1 --SADRRADFLAGTAAAFKAVLLEGVEVVFIVVIATGARPGMLP-YAGLGAL      47
                  4 (D/E)xxE

                2                          3
A_Sequence      49 LSVLAVLV---LIFGPLLGLIPIDILQFTIGTLLILFGMRWLRKAI----      91
                  :: :||| | : | | :| : |:| :| || ||: | : : |
B_Sequence      48 IACIAVLVIGLLVHKP-LSSVPENTLKFIVGLLLTAFGIFWIGEGIGTPW      96
                  5                          6

A_Sequence      92 ----LRASGFIALHDEEKAFASETDLARQ-----          117
                  | | || ||: ||
B_Sequence      97 PGEDLSLIGIFAL---LAAFSFIAVRWLRQYHHAQTTPAR          133
                  7

#-----
===== FINISHED =====
Average Quality (AQ)      22.15 +/- 7.74
Standard score (Z): 8.0
Precise score (Z): 8.0

```
