# Supplementary material for: The LysE Superfamily of Transport Proteins Involved in Cell Physiology and Pathogenesis
Source: PubMed Central journal article supplement (PMC4608589; doi:10.1371/journal.pone.0137184), 2015-10-16
Supplement: pone.0137184.s014.pdf [file pone.0137184.s014.pdf]

# Fig. S14A

```
# 1: A_Sequence: Ceu1 TMS #1-3 (A8SU47 ; 2.A.107 homologue)
# 2: B_Sequence: Ceu1 TMS #4-6
# Matrix: EBLOSUM62
# Gap_penalty: 8.0
# Extend_penalty: 2.0
#
# Length: 98
# Identity:      22/98 (22.4%)
# Similarity:    42/98 (42.9%)
# Gaps:          8/98 ( 8.2%)
# Score: 82.0
#
#=====
#                               1 Fully conserved D
A_Sequence      1 ---MSIVELFMLAVGLSMDDAFAVSICKGLSLRDIKVKHMVIAGVWFGGFQ      47
                ||  :|:| | | :| | | :  :  :  :|:| | :|
B_Sequence      1 NADMSAKVMFLLAVATSIDDALAVGV--SFAFLKLTLYIIVLAVIFIGCIT      48
                ||  :|:| | | :| | | :  :  :  :|:| | :|
#                               4 Fully conserved D
                2                               3
A_Sequence      48 ALMPTLGYVLGSFFADLVSKWSHWIAFVLLLFFIGGSMIKESFGGEEV      95
                :  |  :| | |  :  :|:| | | :|:| : |
B_Sequence      49 FIFSAAGVKIGSIFGTKYKSKAELAGGIILILIGIKVVLDGLGIL---      93
                5                               6
#-----
===== FINISHED =====
Average Quality (AQ)      24.98 +/- 7.01
Standard score (Z): 8.0
Precise score (Z): 8.1
```

# Fig. S14B

```

# 1: A_Sequence: Rsp2 TMS #1-3 (R9SLI6 ; 2.A.107 homologue)
# 2: B_Sequence: Rsp2 TMS #4-6
# Matrix: EBLOSUM62
# Gap_penalty: 8.0
# Extend_penalty: 2.0
#
# Length: 102
# Identity:      22/102 (21.6%)
# Similarity:   40/102 (39.2%)
# Gaps:         20/102 (19.6%)
# Score: 64.0
#
#=====
                                1 Fully conserved D
A_Sequence      1 -----MNIFELFILAIGLSMDAFAVSVCKGLSLGRINAKHMCIAG      40
                   |:| :|:|:|: |:|:| | | | | | |:| : : : |
B_Sequence      1 SKEEEHVNADMDIKSMFILAVATSIDALAV----GVTFAFLKVE-IVSAV      45
                                4 Fully conserved D

                                2                               3
A_Sequence      41 AWFGGFQALMPLVGYFGGRFFADKVTRYSHWVAFVLLVFIGAGMIKE---      87
                   :: | : | | | | : :|:| | :|
B_Sequence      46 SFIGVITFVCSAAGVKIGSLFGMKYKSKAELCGGIILILIGTKILLEGLG      95
                                5                               6

A_Sequence      87 --      87
B_Sequence      96 MI      97

#-----
===== FINISHED =====
Average Quality (AQ)      19.03 +/- 6.10
Standard score (Z): 7.0
Precise score (Z): 7.4

```

# Fig. S14C

```

# 1: A_Sequence: Msp1 TMS #1-3 (C6JCY1 ; 2.A.107 homologue)
# 2: B_Sequence: Msp1 TMS #4-6
# Matrix: EBLOSUM62
# Gap_penalty: 8.0
# Extend_penalty: 2.0
#
# Length: 103
# Identity:      22/103 (21.4%)
# Similarity:   43/103 (41.7%)
# Gaps:         20/103 (19.4%)
# Score: 67.0
#
#=====
A_Sequence      1 -----MDIVSTLLIAVALAMDAFSVSLTKGFTLKNITLKQILWF      39
                  :|:| | | :|:| | | :| | | | :|
B_Sequence      1 FSDDLDDDEDTFSSFAELILLAVATSIDAFAVGVTYA-VLKIDILIPVIII  49
                  4 Fully conserved D
                2                               3
A_Sequence      40 GVFFGGFQSLMPILGWTLGVQLQLIVSEVAPWIAFILLVLIGANMIRE-      88
                  |: | : |:| || :: : : :|:|:| :: |
B_Sequence      50 GLV--AF--IFTIIGIYLGKKIGDYFGDKFEILGGVILILLGCRILLEGL  95
                  5                               6

A_Sequence      88 ---      88
B_Sequence      96 GFL      98

#-----
===== FINISHED =====
Average Quality (AQ)      21.80 +/- 6.60
Standard score (Z): 7.0
Precise score (Z): 6.9

```
