# Supplementary material for: The LysE Superfamily of Transport Proteins Involved in Cell Physiology and Pathogenesis
Source: PubMed Central journal article supplement (PMC4608589; doi:10.1371/journal.pone.0137184), 2015-10-16
Supplement: pone.0137184.s015.pdf [file pone.0137184.s015.pdf]

# Fig. S15A

```

# 1: A_Sequence: Gth1 TMS #1-3 (A4IKQ1 ; 2.A.109 homologue)
# 2: B_Sequence: Gth1 TMS #4-6,7
# Matrix: EBLOSUM62
# Gap_penalty: 8.0
# Extend_penalty: 2.0
#
# Length: 141
# Identity:      29/141 (20.6%)
# Similarity:    52/141 (36.9%)
# Gaps:          50/141 (35.5%)
# Score: 98.0
#
#=====
A_Sequence      1 MSVDLFSPEFWTALLSIVII DLVLAGDNAIVIGLAARNLPKHQQKAVIW      50
                  | : : | : | | : : | | : : | | | | | |
B_Sequence      1 -----GSLWEAVRTIIIA DALMGLDN VLAVAGAA-----HGHFLLVIL      38
                  4 DxxxxxDN
                2                               3
A_Sequence      51 GTVGAVVIRAM-ATIFVVWLLKIPGLLLVGGLLLVIAYKLLVEE---KG      96
                  | : : | | : : : | : : | : : | | | | : : | |
B_Sequence      39 GLLISVPIMVWGSTLILKWIERFP I IITIGAGILAWTASKMIVDEPFLKG      88
                  5                               6

A_Sequence      97 H---DDIEAG----- 103
                  : | : |
B_Sequence      89 YFANPVIKYGFELLVAAVIAIGTQKKRKAARKPHLKVANE 129
                  7

#-----

===== FINISHED =====
Average Quality (AQ)      23.59 +/- 7.93
Standard score (Z): 9.0
Precise score (Z):  9.4

```

# Fig. S15B

```

# 1: A_Sequence: Bsp2 TMS #1-3 (G8M4S7 ; 2.A.109 homologue)
# 2: B_Sequence: Bsp2 TMS #4-6,7
# Matrix: EBLOSUM62
# Gap_penalty: 8.0
# Extend_penalty: 2.0
#
# Length: 143
# Identity:      30/143 (21.0%)
# Similarity:   44/143 (30.8%)
# Gaps:         50/143 (35.0%)
# Score: 92.0
#
#
#=====
                                1 DxxxxxDN
A_Sequence      1 MLEFFSTLHWGAVVQIIVI DILLGGDN AVVIALACRNLPDRQTRGIVLG      50
                   |  |  |  |  |  |  |  |  |  |  |  |  |  |  |  |  |  |  |  |
B_Sequence      1 -----SDRLWAAVKTI VIA DAVMSLDN VIAIAGAAEAADPRHRLALVIFG      45
                                4 DxxxxxDN

                                2                               3
A_Sequence      51 TLGAILLRVILIAFAVMLLD-VPFLKFVGGVLLLWIGVKLMQPDHDEHHI      99
                   :  |  |  |  |  |  |  |  |  |  |  |  |  |  |  |  |  |  |  |
B_Sequence      46 LIVSIPLIVWGSTLV LKLLDRFPVVLLGAALLGWIAGGLI---IDDPFI      92
                                5                               6

A_Sequence      100 DA----- 101
                   |
B_Sequence      93 DRWPALNTDIVGYAARVAGALFVVGWLLRRRALADGNRATG      135
                                7

#-----

===== FINISHED =====
Average Quality (AQ)      21.13 +/- 7.79
Standard score (Z): 9.0
Precise score (Z): 9.1

```

# Fig. S15C

```

# 1: A_Sequence: Pba1 TMS #1-3 (R9LI44 ; 2.A.109 homologue)
# 2: B_Sequence: Pba1 TMS #4-6,7
# Matrix: EBLOSUM62
# Gap_penalty: 8.0
# Extend_penalty: 2.0
#
# Length: 143
# Identity:      25/143 (17.5%)
# Similarity:   47/143 (32.9%)
# Gaps:         53/143 (37.1%)
# Score: 82.0
#
#=====
                                1 DxxxxxDN
A_Sequence      1 MDLLSPEFWMALLSIVLI DLVLAGDNAIVIGLAARNVPQQDQKKVIVWGT      50
                  : | | : : | : : | : : | | : : | | | | : |
B_Sequence      1 -----NQMWAAIRTIIIA DAMMGLDNVLAVAGAAHG-----DTLLVII-GL      40
                                4 DxxxxxDN
                                2                               3
A_Sequence      51 LGAILIRVVM TLLVVQLL-NIPGLRLAGGLALVWIAYKLLIEEK-SHEIK      98
                  : : | | : : : : | | : | | | | | : : : | | | :
B_Sequence      41 AVSVPIMVVGSTMLKLTERFPIVITIGAAVLAWTASKMIVEEPLIHDWF      90
                        5                               6

A_Sequence      99 AG----- 100
                  |
B_Sequence      91 ASPWIKYGFELLVIAAVVLLGNLMKKRKARLHQAKAMPQTNGS      133
                        7

#-----

===== FINISHED =====
Average Quality (AQ)      23.22 +/- 7.53
Standard score (Z): 8.0
Precise score (Z): 7.8

```
