# Supplementary material for: The LysE Superfamily of Transport Proteins Involved in Cell Physiology and Pathogenesis
Source: PubMed Central journal article supplement (PMC4608589; doi:10.1371/journal.pone.0137184), 2015-10-16
Supplement: pone.0137184.s016.pdf [file pone.0137184.s016.pdf]

# Fig. S16A

```
# 1: A_Sequence: Ame2 (MC homologue)
# 2: B_Sequence: Spl1 (LysE homologue)
# Matrix: EBLOSUM62
# Gap_penalty: 8.0
# Extend_penalty: 2.0
#
# Length: 195
# Identity:      16/195 ( 8.2%)
# Similarity:   35/195 (17.9%)
# Gaps:         131/195 (67.2%)
# Score: 38.0
#
#=====
#
#                               4
A_Sequence      1 VLGLYRGFNVSVQGIIIYRAAYFGFYDTTKNLLPDPKKTPLHITFLIAQT      50
B_Sequence      0 -----
#
#                               5
A_Sequence      51 VTTLAGIISYPFDTVRRRMMMQSGLKRAE----VMYKNTLDCWIKTAKTE      96
B_Sequence      1 -----VLTQGIRKQHRFVVALICSLCDAFLISAGVA      31
#                               1           2
#
A_Sequence      97 GIAAFFKGSLSNI-LRGTGGALVLTLYDSIKDILEKSLRK-----      135
B_Sequence      32 GLGSLIEQSPTLLRLAGGGGALFLFIY-GLK-CLFSALQAEQELGETESN      79
#                               3
#
A_Sequence      135 -----
B_Sequence      80 PTSRRQVILTLAITLCNPNVYLDTVVLLGGISATFVGQGRYLFG      124
#                               4
#-----
#----- FINISHED -----
Average Quality (AQ)      14.44 +/- 5.82
Standard score (Z):      4.0
Precise score (Z):      4.1
```

# Fig. S16B

```
# 1: A_Sequence: Pmo1 (MC homologue)
# 2: B_Sequence: Hgr1 (RhtB homologue)
# Matrix: EBLOSUM62
# Gap_penalty: 8.0
# Extend_penalty: 2.0
#
# Length: 89
# Identity:      26/89 (29.2%)
# Similarity:   39/89 (43.8%)
# Gaps:         7/89 ( 7.9%)
# Score: 70.0
#
#
```

```
#####
                                     3
A_Sequence      1 TQFWRYFIGNLASGGAAGDTSLCFVYTLDFATRLAADIGKGAGQREFNG      50
| | | :| : | | | | :| | | | :| | |
B_Sequence      1 TDLWTYVLGAIGIVLLPGPNSL-FVLSVATAR---GVRVGYHAACGVF--      44
                                     1                               2

                                     4
A_Sequence      51 LGDCLVKIFKADGIMMGLYRGFGVSVQGIIIYRAAFFGFY      89
| | | :| :| | | | | :| | | | :| | |
B_Sequence      45 LGDSILLLFTALGAASLLRGYPALFM-VVKYVGAAYLFW      82
                                     3
```

```
#-----
===== FINISHED =====
Average Quality (AQ)      16.98 +/- 5.99
Standard score (Z):      9.0
Precise score (Z):       8.8
```

# Fig. S16C

```
# 1: A_Sequence: Oga1 (MC homologue)
# 2: B_Sequence: Sro1 (CadD homologue)
# Matrix: EBLOSUM62
# Gap_penalty: 8.0
# Extend_penalty: 2.0
#
# Length: 87
# Identity: 26/87 (29.9%)
# Similarity: 39/87 (44.8%)
# Gaps: 14/87 (16.1%)
# Score: 59.0
#
#
#=====
                        5
A_Sequence  1  ISWMIAQSATAVAGLTSYPFDTVHHCMMMOSVRKGTGIMYTGATDCWRKI      50
      |: ::| ||| ||||| | |           :: | | | | : | :
B_Sequence  1  IAILVAVSAVAALGLTVVP-D--RWAGLLGLVPFGMGV-----WGLV      39
                        2                   3

                        6
A_Sequence  51 LRDEGGKAFFKGAXSSVLRGVGAFVLVLYDEIKKYT      87
      : || : | | : | : | | : | | | | |
B_Sequence  40 RKDDGGEA---GPVASGVVSVAGVTLANGADNISVYT      73
                        4

#-----

===== FINISHED =====
Average Quality (AQ)      13.78 +/- 5.35
Standard score (Z): 8.0
Precise score (Z): 8.5
```

# Fig. S16D

# 1: A\_Sequence: Iscl (MC homologue)  
# 2: B\_Sequence: Ghi1 (CaCA2 homologue)  
# Matrix: EBLOSUM62  
# Gap\_penalty: 8.0  
# Extend\_penalty: 2.0  
#  
# Length: 97  
# Identity: 30/97 (30.9%)  
# Similarity: 51/97 (52.6%)  
# Gaps: 10/97 (10.3%)  
# Score: 75.0  
#  
#

```
#####  
A_Sequence      1 LGNCLTKIFKSDGL-MGLYRGFG--VSVQGI I IYRAA-YFGF--FDTAKG      44  
                  :|: | : :| | : : | || : : : : || : ||| : : |  
B_Sequence      1 IGSTLGMV-AADALAIAIGRAFGRHLPERTVALFAAALFFGFGIWLLTQG      49  
                  5                               6  
  
A_Sequence      45 MLPDPKNTPLVISWLIAQT VTTVAGIMSYPFDTVRRRMMMQSGRAKA      91  
                  :| | | : :| | | | | | | | | | | | | | : : : | : |  
B_Sequence      50 LL-D-ATVPVLIGLTLTAVAVVMVAGI-GVIVSTHRRRQLEKAIRTRA      93  
                  7
```

#-----  
=====  
Average Quality (AQ) 13.98 +/- 5.83  
Standard score (Z): 10.0  
Precise score (Z): 10.5

# Fig. S16E

```
# 1: A_Sequence: Mbr1 (MC homologue)
# 2: B_Sequence: Cst1 (MntP homologue)
# Matrix: EBLOSUM62
# Gap_penalty: 8.0
# Extend_penalty: 2.0
#
# Length: 79
# Identity:      22/79 (27.8%)
# Similarity:   39/79 (49.4%)
# Gaps:         7/79 ( 8.9%)
# Score: 62.0
#
#
#=====
```

```

                                     2
A_Sequence      1 FWRYFA-GNLASGGAAGATSLCFVYPLD----FA-RTRLAADVGKSAQR      44
                  | : | | | : | : | : | : | : | | : | : | :
B_Sequence      1 FFGFFQWGMLSLGWLSGSTFRTFIEPVDHWIAFVLLTFIGVKMWKESTEE      50
                   2                               3

                                     3
A_Sequence      45 MLP-DPKNVHIFISWMIAQSVTAVAGLVS      72
                  | | : | : : : | : | | : |
B_Sequence      51 AEPLDLTSVKLMLTLSVATSIDAFAAGIS      79
                               4
```

```
#-----
===== FINISHED =====
Average Quality (AQ)      13.34 +/- 5.38
Standard score (Z): 9.0
Precise score (Z): 9.1
```

# Fig. S16F

# 1: A\_Sequence: Cmi2 (MC homologue)  
# 2: B\_Sequence: Aho1 (ILT homologue)  
# Matrix: EBLOSUM62  
# Gap\_penalty: 8.0  
# Extend\_penalty: 2.0  
#  
# Length: 142  
# Identity: 36/142 (25.4%)  
# Similarity: 58/142 (40.8%)  
# Gaps: 7/142 ( 4.9%)  
# Score: 65.0  
#  
#

```
#####  
2  
A_Sequence 1 QGFLSFWRCNLANVIRYFPTQALNF-AFKDKYKQIFMSGIDKK---TQFG 46  
| : | : | : : : | | | | : : | : : | |  
B_Sequence 1 QRWLG YIRDKVDSALLGRGTVWTLAEVAFISVYREIFETILFYQALWTQVD 50  
3  
A_Sequence 47 KWFLANLASGGAAGATSLCFVYPLDFARTRLAADVGGKNEERQFKGLADC 96  
| | | | : | | | | : : | |  
B_Sequence 51 GQTQAFLFYGIGA AVLALA-VVSLLEFRVGMTLPLGVFFRVTSLSVLLVLS 99  
4  
A_Sequence 97 LAKIGKRDGIQGLYQGFAVSVNGIIIVYRASYFGCYDTIKGIL 138  
: : | | | | : : | | : | | | : : | |  
B_Sequence 100 VILLGK--GIAALQEAGLISVMHLAVPTVDWLG VYPTVQGLL 139  
5
```

```
#-----  
===== FINISHED =====  
Average Quality (AQ) 13.51 +/- 5.69  
Standard score (Z): 9.0  
Precise score (Z): 9.1
```

# Fig. S16G

```
# 1: A_Sequence: Rsy1 (MC homologue)
# 2: B_Sequence: Sya2 (TerC homologue)
# Matrix: EBLOSUM62
# Gap_penalty: 8.0
# Extend_penalty: 2.0
#
# Length: 144
# Identity:      28/144 (19.4%)
# Similarity:   48/144 (33.3%)
# Gaps:         50/144 (34.7%)
# Score: 38.0
#
#
```

```
#####
A_Sequence      1 ANVIRYFPTQALNFGFKDKYKKIFLDNVDKRTQFWRYFAGNLASGGAAGA      50
                  |:|  :::  :  :  : || | | | |
B_Sequence      1 -----WVGWK-MWRELRAHGEPEDAE---HMAGKAAPKGFAQA      34
                  3

A_Sequence      51 TSLCFVYPLDFARTRLAAD--VGKAGAGREFNGLGDCLAKIFKSDGLKGL      98
                  : : | : : | : ||| || | : : : | | | :
B_Sequence      35 -----AWAVAIADVSMSLDNVLAVAGAAREHPGI--LVIGLVLSVALMGV      77
                  4                               5

A_Sequence      99 YQGFNVSVQGIIIYRA-AYFGI-----      119
                  |:  : | ||| ||| :
B_Sequence      78 --AANLLARVIERYRAVAYFGLIVILYVAGKMIYEGAIDPATGL      119
                  6
```

```
#-----
```

```
===== FINISHED =====
Average Quality (AQ)      12.70 +/- 5.66
Standard score (Z):       4.0
Precise score (Z):        4.4
```

# Fig. S16H

```
# 1: A_Sequence: Rsy1 (MC homologue)
# 2: B_Sequence: Orf9 (NAAT homologue)
# Matrix: EBLOSUM62
# Gap_penalty: 8.0
# Extend_penalty: 2.0
#
# Length: 75
# Identity:      19/75 (25.3%)
# Similarity:   35/75 (46.7%)
# Gaps:         3/75 ( 4.0%)
# Score: 63.0
#
#
#=====
```

|            |    |                                   |                           |                                            |    |
|------------|----|-----------------------------------|---------------------------|--------------------------------------------|----|
|            |    | 2                                 |                           | 3                                          |    |
| A_Sequence | 1  | <b>SVQGI</b>                      | <b>IYRAAYFGIY</b>         | DTAKGMLPDPKNTH <b>IFVSWMIAQSVTAVAGF-GS</b> | 49 |
|            |    | ::                                | :      ::     ::          | :: :  :                                    |    |
| B_Sequence | 1  | <b>AISSTIVYGARY</b>               | PSMFDT- <b>MGIL-TIIAF</b> | <b>CFSWLLFRSAPLLVRF</b>                    | 48 |
|            |    |                                   | 4                         | 5                                          |    |
| <br>       |    |                                   |                           |                                            |    |
| A_Sequence | 50 | <b>Y</b>                          | <b>PFDTVRRRMMMQ</b>       | <b>SGRKGAEIMYSG</b>                        | 74 |
|            |    | :                                 | :     :       : :         |                                            |    |
| B_Sequence | 49 | TGINVITR <b>IMGLILGALGIEFIANG</b> |                           |                                            | 73 |
|            |    |                                   | 6                         |                                            |    |

```
#-----
===== FINISHED =====
Average Quality (AQ)      12.39 +/- 5.04
Standard score (Z): 10.0
Precise score (Z): 10.0
```



# Fig. S16I

```
# 1: A_Sequence: Cfe1 (MC homologue)
# 2: B_Sequence: Bsm1 (NicO homologue)
# Matrix: EBLOSUM62
# Gap_penalty: 8.0
# Extend_penalty: 2.0
#
# Length: 114
# Identity:      26/114 (22.8%)
# Similarity:   46/114 (40.4%)
# Gaps:         8/114 ( 7.0%)
# Score: 67.0
#
#
#=====
A_Sequence      1 SYRGIFHAFSTIYQQEGFLAFYRGSLSLTVLVYMN-LEKIWNQPRDRFSLF      49
      :|:| | : | | : | | : | | : | | : | | : | |
B_Sequence      1 TYKGIPYVKSLEFI---GIIHGLAGSAAMVLLTMS TVEKAWEGL--LYILF      45
      3
A_Sequence      50 QNFANVCLAAAVTQTLSPFPDFTVKKRKMQAQSPYLPFCGGVDVHFSGAVDC      99
      | | : | | | | : : : | : | :
B_Sequence      46 FGAGTVLGMCLCFTLLIGIPFTLSARKIRIHNAFIQITGFISTVF--GIHY      93
      4 5
A_Sequence      100 FRQVVKAQVGLGLW      113
      : :|: ||
B_Sequence      94 MYNLGVTEGLFKLW      107
      3
#-----
===== FINISHED =====
Average Quality (AQ)      14.43 +/- 5.72
Standard score (Z):      9.0
Precise score (Z):      9.3
```

# Fig. S16J

```
# 1: A_Sequence: Cmi2 (NicO homologue)
# 2: B_Sequence: Msp16 (GAP homologue)
# Matrix: EBLOSUM62
# Gap_penalty: 8.0
# Extend_penalty: 2.0
#
# Length: 153
# Identity:      19/153 (12.4%)
# Similarity:   30/153 (19.6%)
# Gaps:         78/153 (51.0%)
# Score: 40.0
#
#
#=====
```

```
A_Sequence      1 -----QGFLSFWRG          9
                   :|  ||
B_Sequence      1 PRVQMAAGVIVLLVAAAVAVGLGGTKAGRRGQLATRTSRLMEGH-SLWIA  49
                   3
                   2                               3
A_Sequence      10 NLANVIRYFPTQALNFAFKDKYKQIFMSGIDKKTQFGKWFLANLASGGAA  59
                   :| :  |  : :  |  ||  ||  |  | : : |
B_Sequence      50 GVAGLGIALP----SVDYLAALTIIASGAAAATQVGALLLFNVVAFGLV  95
                   4                               5
                   4
A_Sequence      60 GATSLCFVYPLDFARTRLAADVKGNEERQFKGLADCLAKIGKRDGIQGL  109
                   :|::  |  |  |:|
B_Sequence      96 EIPLICYLVAPDRTRAMLSAL-----  116

A_Sequence      110 YQG      112
B_Sequence      116 ---      116
```

```
#-----
===== FINISHED =====
Average Quality (AQ)      10.38 +/- 5.16
Standard score (Z):      6.0
Precise score (Z):      5.8
```

# Fig. S16K

```
# 1: A_Sequence: Cmy1 (MC homologue)
# 2: B_Sequence: Glo1 (DsbD homologue)
# Matrix: EBLOSUM62
# Gap_penalty: 8.0
# Extend_penalty: 2.0
#
# Length: 116
# Identity:      29/116 (25.0%)
# Similarity:   51/116 (44.0%)
# Gaps:         16/116 (13.8%)
# Score: 69.0
#
#
```

```
#####
A_Sequence      1 SYFGCYDTIKGLLP--NPKQTPFVLSFLIAQAVTTFSGI-LSYPFDTVRR      47
                  :| | : : ||| :| | :|:: :|| : :| |||
B_Sequence      1 TYIGAF--VAGLLSFLSPCVLPLIPSYITTYITGLSFSDLDAEHPTHVVR      48
                  1

A_Sequence      48 RMMMQSGEAERQYKGTIDCFFKIYKQEGLKAFFRGAF----SNILRGTGG      93
                  :|:| | : : | :| :| :| :| :| :| :| :|
B_Sequence      49 KTMLHS-----LAFVSGFTVVFVLLGASATYIGSFLLQOHMELVRKLG      91
                  2

A_Sequence      94 ALVLVLYDKIKELVNL      109
                  |::| : |||
B_Sequence      92 ILIIVFGIHVTGLVPL      107
                  3
```

```
#-----
===== FINISHED =====
Average Quality (AQ)      13.12 +/- 5.64
Standard score (Z):      10.0
Precise score (Z):       9.9
```
