# Supplementary material for: The LysE Superfamily of Transport Proteins Involved in Cell Physiology and Pathogenesis
Source: PubMed Central journal article supplement (PMC4608589; doi:10.1371/journal.pone.0137184), 2015-10-16
Supplement: pone.0137184.s019.pdf [file pone.0137184.s019.pdf]

Fig. 19A

RhtB - Clustal

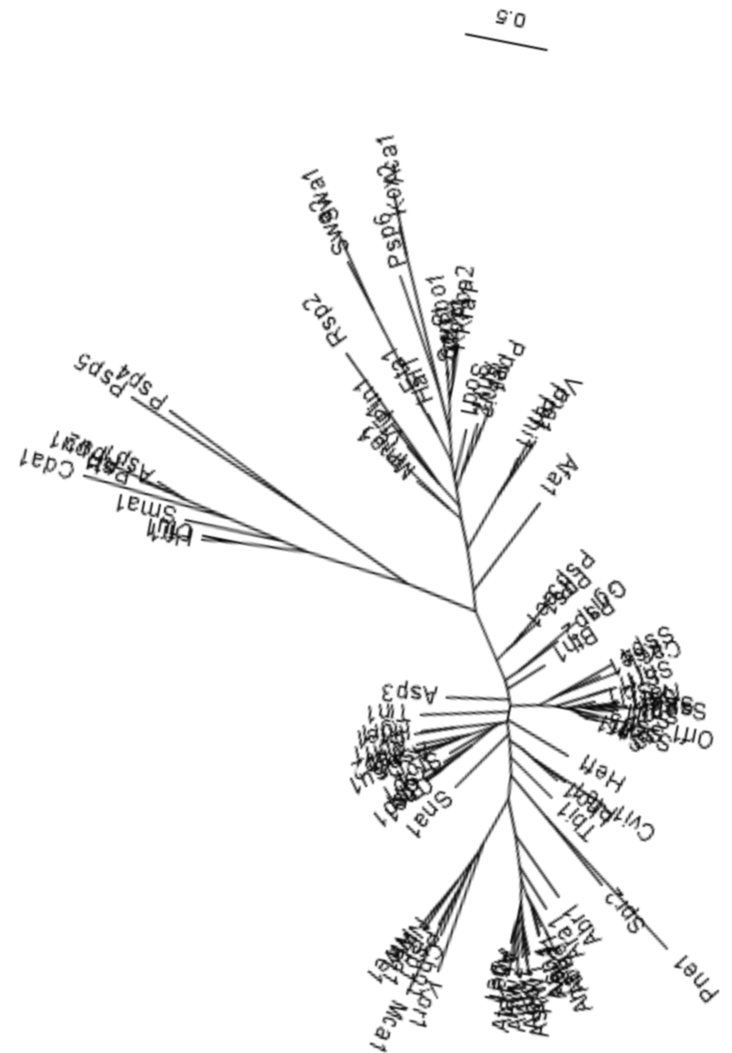



Fig. 19C

RhtB - ProbCons

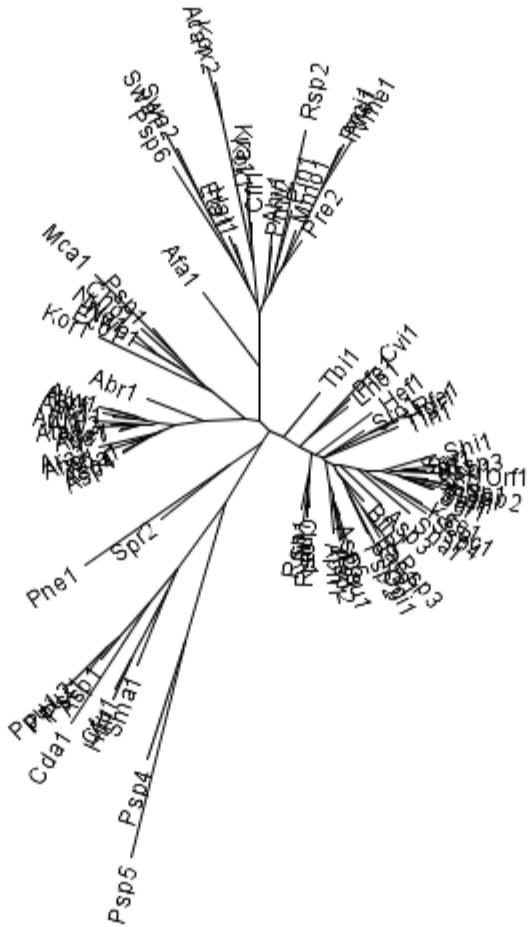

0.4
