# Supplementary material for: The LysE Superfamily of Transport Proteins Involved in Cell Physiology and Pathogenesis
Source: PubMed Central journal article supplement (PMC4608589; doi:10.1371/journal.pone.0137184), 2015-10-16

Fig. 24A

TerC – Clustal

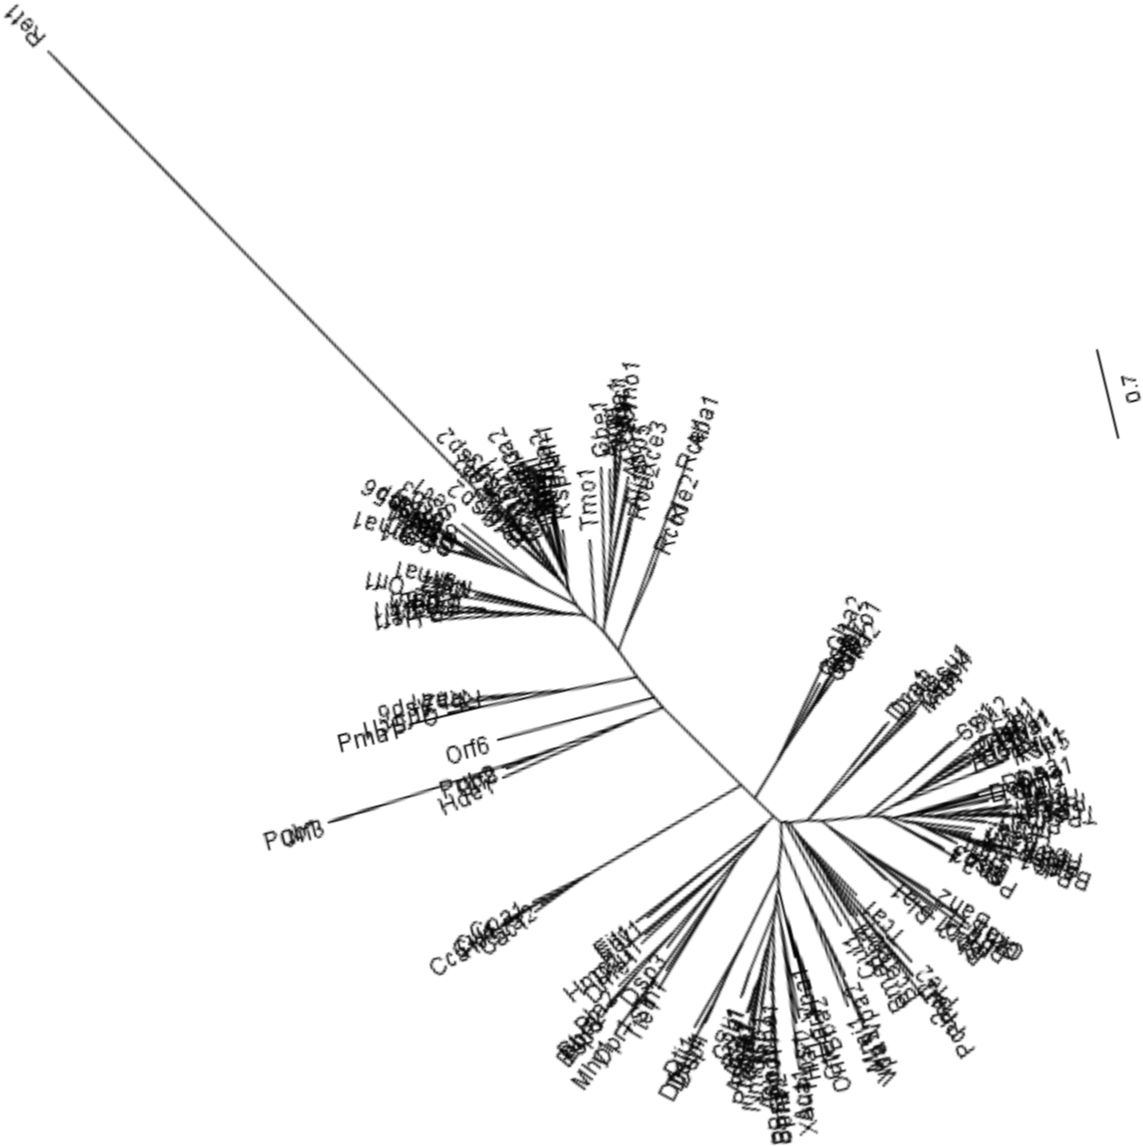

Fig. 24B

TerC - Mafft

0.6

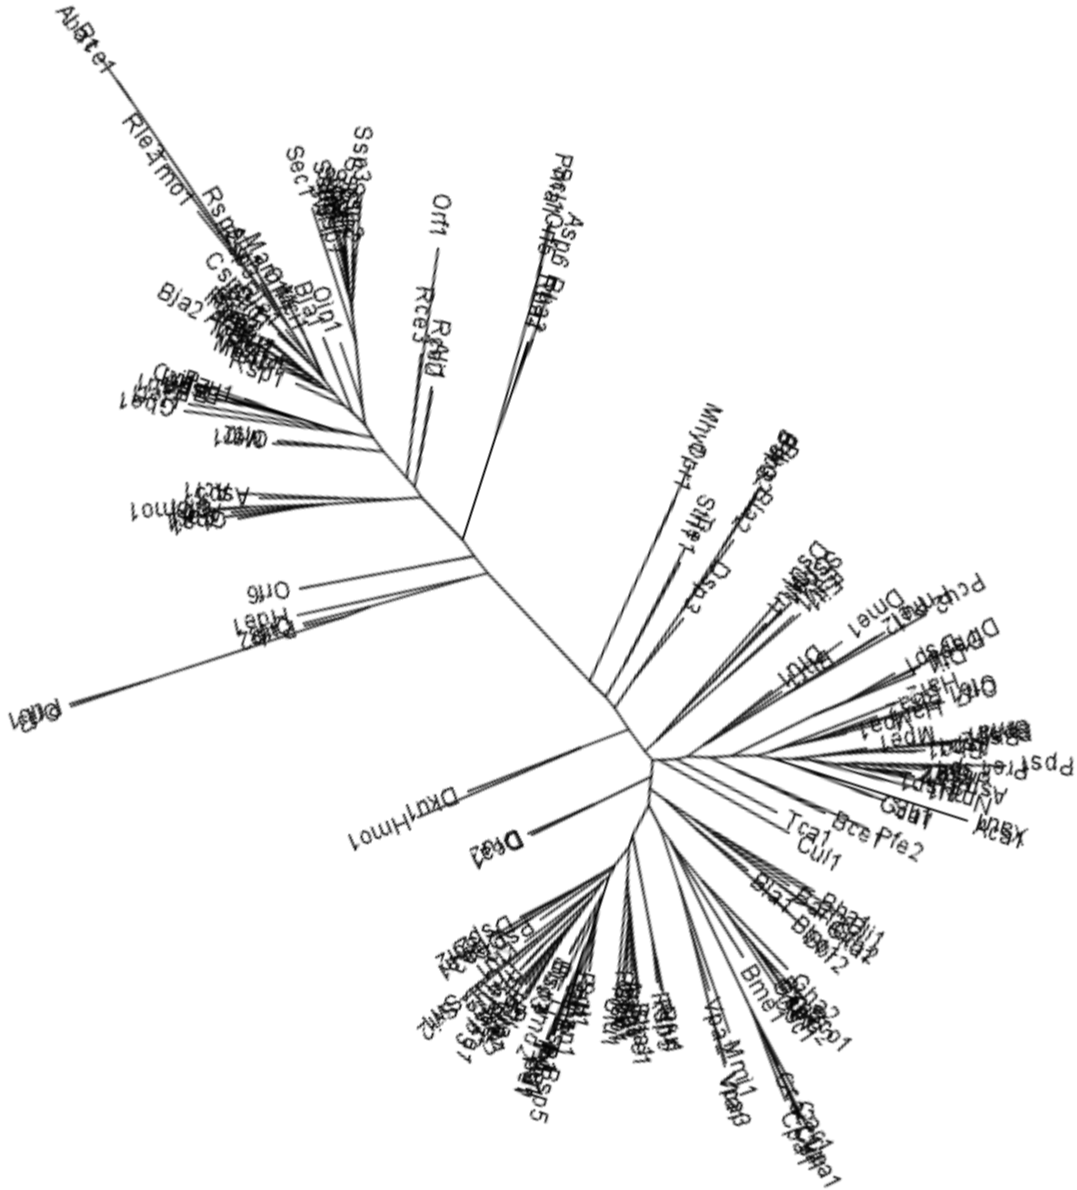

Fig. 24C

TerC - ProbCons

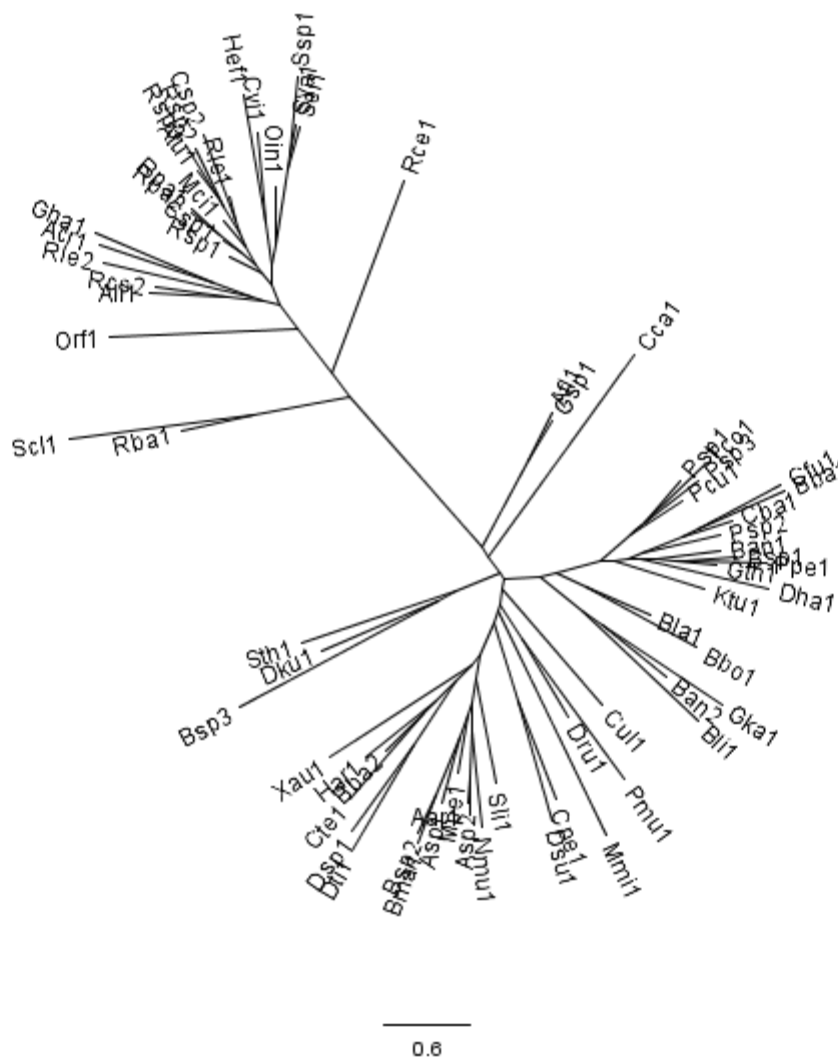

Supplement: pone.0137184.s024.pdf [file pone.0137184.s024.pdf]
