# Supplementary material for: The LysE Superfamily of Transport Proteins Involved in Cell Physiology and Pathogenesis
Source: PubMed Central journal article supplement (PMC4608589; doi:10.1371/journal.pone.0137184), 2015-10-16

**Fig. 26A**

NicO – Clustal

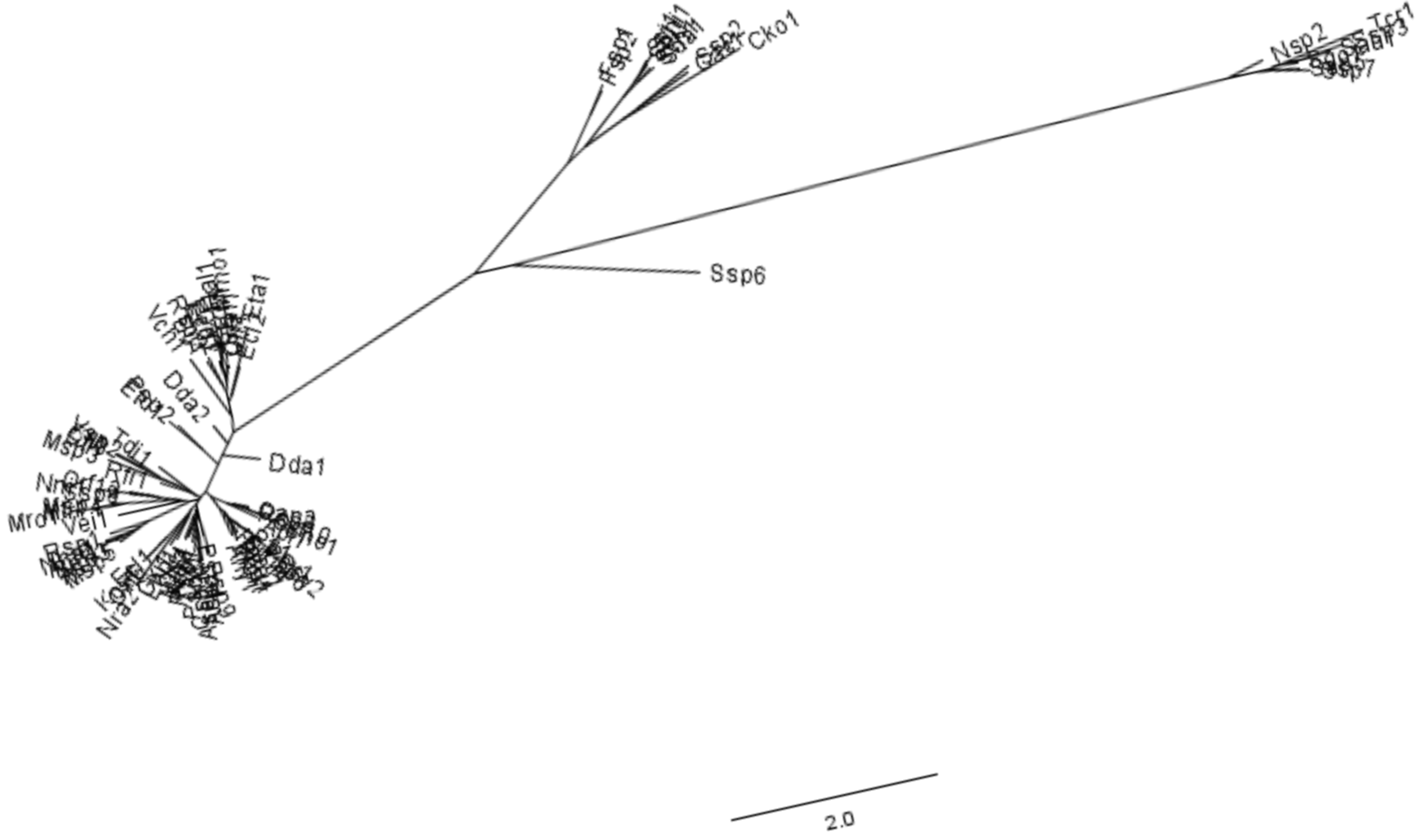

Fig. 26B

NicO - Mafft

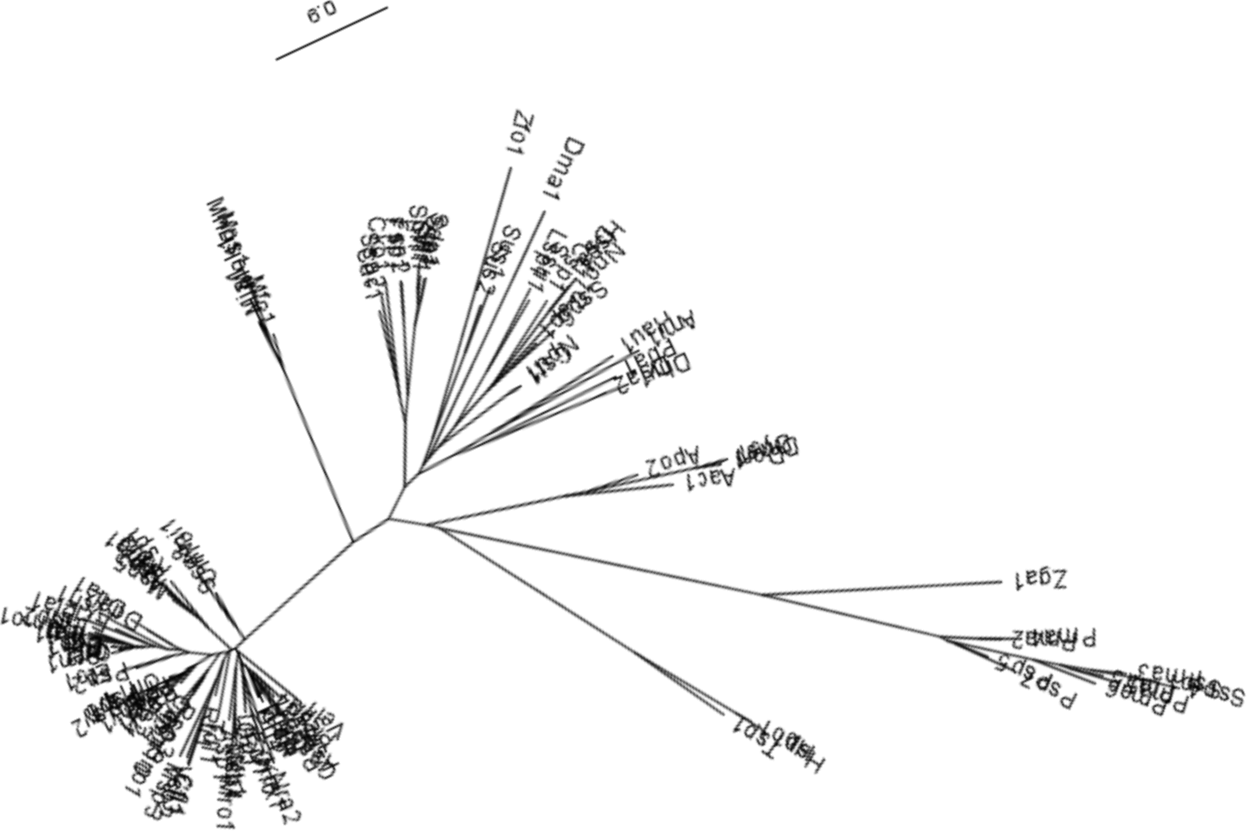

Supplement: pone.0137184.s026.pdf [file pone.0137184.s026.pdf]
