# Supplementary material for: The LysE Superfamily of Transport Proteins Involved in Cell Physiology and Pathogenesis
Source: PubMed Central journal article supplement (PMC4608589; doi:10.1371/journal.pone.0137184), 2015-10-16

Fig. 27B

GAP - Mafft

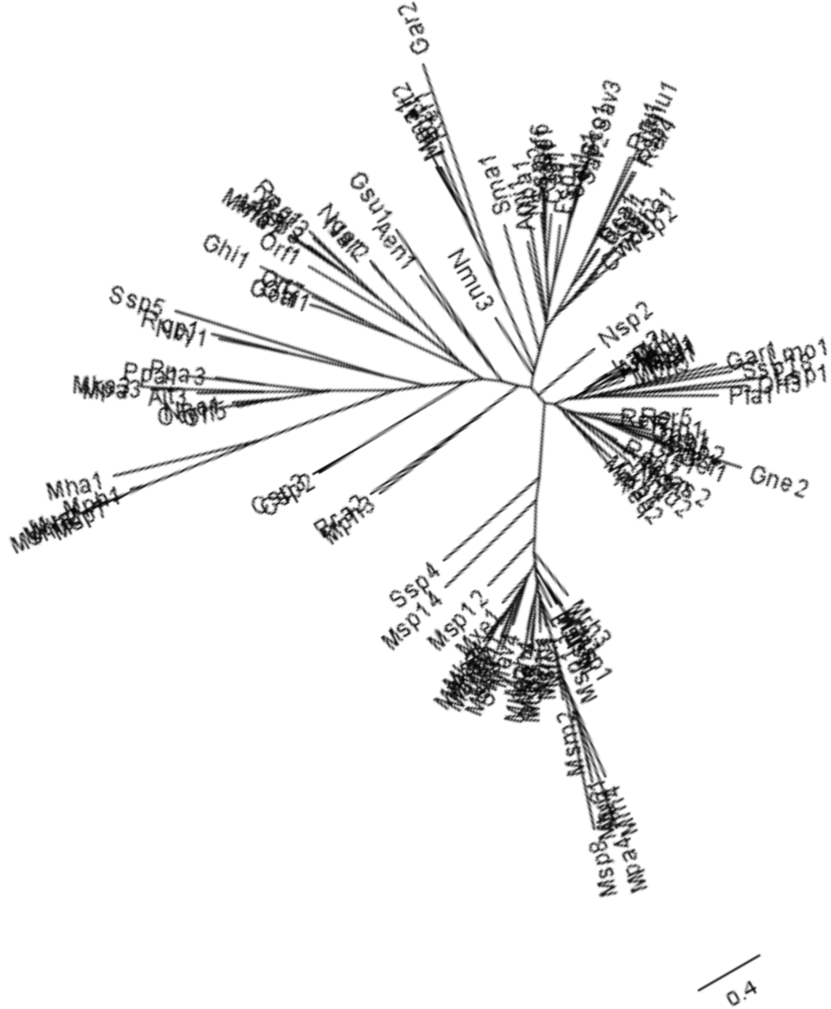

Fig. 27C

GAP - ProbCons

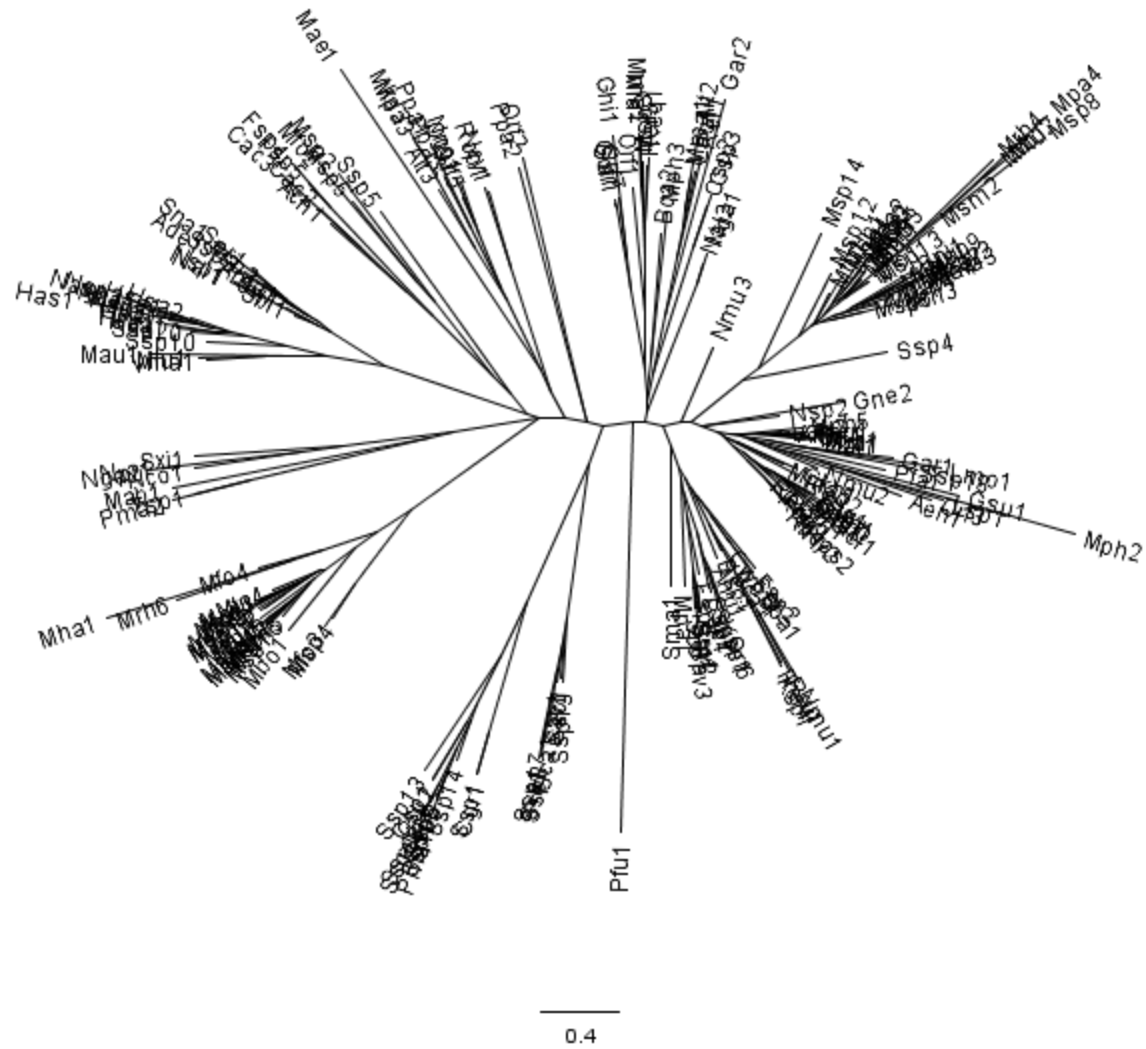

Supplement: pone.0137184.s027.pdf [file pone.0137184.s027.pdf]
