# Supplementary material for: The LysE Superfamily of Transport Proteins Involved in Cell Physiology and Pathogenesis
Source: PubMed Central journal article supplement (PMC4608589; doi:10.1371/journal.pone.0137184), 2015-10-16
Supplement: pone.0137184.s034.pdf [file pone.0137184.s034.pdf]

# Fig. S2A

```

# 1: A_Sequence: Pst1 (2.A.75.1.1 homologue)
# 2: B_Sequence: Bth1 (2.A.76.1.5 homologue)
# Matrix: EBLOSUM62
# Gap_penalty: 8.0
# Extend_penalty: 2.0
#
# Length: 171
# Identity:      57/171 (33.3%)
# Similarity:   87/171 (50.9%)
# Gaps:        20/171 (11.7%)
# Score: 159.0
#=====

```

|            |     |                             |                      |                       |                      |                 |                 |     |
|------------|-----|-----------------------------|----------------------|-----------------------|----------------------|-----------------|-----------------|-----|
| A_Sequence | 1   | <u>LLILPLGPQNAFVLN</u> ---- | QGVKRHYHLM           | <u>MTATLCSLS</u>      | SDVVLICAGIFG         | <u>GSA</u>      | 46              |     |
|            |     | ::                          | ::                   | ::                    | ::                   | ::              |                 |     |
| B_Sequence | 1   | <u>LLLP-GPN</u>             | SMYVLSL              | AAQRGVKAGYRA          | <u>ACGVF--</u>       | VGDTVLMVLSAAG   | 47              |     |
|            |     | 1                           |                      |                       | 2                    |                 |                 |     |
| A_Sequence | 47  | <u>LLQQSP</u>               | <u>LLLLT</u>         | <u>VITWAGVAFLLWY</u>  | <u>GWGALRTAFRREL</u> | LALA-SGLDIRQS-R | 94              |     |
|            |     |                             | ::                   | ::                    | ::                   | ::              |                 |     |
| B_Sequence | 48  | <u>LLKANP</u>               | <u>LLFSVVKY</u>      | <u>GGAAYLLYIGSGML</u> | RGAWRKLARPADAGADV    | RRRAVD          | 97              |     |
|            |     |                             | 3                    |                       |                      |                 |                 |     |
| A_Sequence | 95  | G-RI                        | <u>IATLLAVT</u>      | <u>WLNPHVYLDTFVVL</u> | GSLGSQFPD---         | TH-ARQWF        | <u>ALGT</u>     | 139 |
|            |     |                             |                      |                       |                      |                 |                 |     |
| B_Sequence | 98  | GERPFRKAL                   | <u>VVSLLNPKAIL--</u> | <u>FFI--</u>          | <u>SFFIQFV</u>       | DPSYAHPAL       | <u>LSFVVLGA</u> | 143 |
|            |     |                             | 4                    |                       |                      |                 | 5               |     |
| A_Sequence | 140 | <u>VS--ASV</u>              | <u>LWFFGLALLA</u>    | <u>AWLA</u>           |                      |                 | 158             |     |
|            |     | ::                          |                      | ::                    |                      |                 |                 |     |
| B_Sequence | 144 | <u>IAQFAS</u>               | <u>FVYLSTLIFT</u>    | GARLA                 |                      |                 | 164             |     |

```

#-----
===== FINISHED =====
Average Quality (AQ)      18.75 +/- 6.96
Standard score (Z):      20.0
Precise score (Z):      20.1

```

# Fig. S2B

```

# 1: A_Sequence: Hall (2.A.76.1.5 homologue)
# 2: B_Sequence: Okil (2.A.77.1.1 homologue)
# Matrix: EBLOSUM62
# Gap_penalty: 8.0
# Extend_penalty: 2.0
#
# Length: 124
# Identity:      33/124 (26.6%)
# Similarity:   63/124 (50.8%)
# Gaps:         12/124 ( 9.7%)
# Score: 107.0
#=====
                2                               3
A_Sequence      1 IGDAVLIFCAYIGIASLIRSSPFLFSLVKMLGALYLLYLGLKILYSTLAK      50
  | | : | | : : : | | : : | : : : | | : : : | | : |
B_Sequence      1 IGNGLIVMSLL-LAYLLKFIPESW-ILGLLG-LFPITVGLKTFFS----      43
                2                               3
                4
A_Sequence      51 KGQEQSAAKEEPEHTFRKALTLSLTNPKA--ILFYVSFFVQFIDMDYAHT      98
  | | : | | | | : : | | : | : | | : | : | | : | : :
B_Sequence      44 KEDETAKAKASDAHLIRDVVLMTLTCSADNLAIYIPFFA---SVDFSYL      90
                4
                5
A_Sequence      99 GVSFAILAVILEMISFCYMTLLIF      122
  | : : | | : | | : : |
B_Sequence      91 PVILIVFLLILSAVSFTALKITKF      114
                5
#-----
===== FINISHED =====
Average Quality (AQ)      23.76 +/- 7.02
Standard score (Z):      12.0
Precise score (Z):      11.9

```

# Fig. S2C

```
# 1: A_Sequence: Asp2 (2.A.75.1.3 homologue)
# 2: B_Sequence: Cth1 (2.A.77.1.2 homologue)
# Matrix: EBLOSUM62
# Gap_penalty: 8.0
# Extend_penalty: 2.0
#
# Length: 144
# Identity:      38/144 (26.4%)
# Similarity:   65/144 (45.1%)
# Gaps:         14/144 ( 9.7%)
# Score: 92.0
#=====
#
#           2                               3
A_Sequence 1 LRQGLRREHVVMPVVLVCALSDAVLLQVGVWGMGGVLLARPEWAQFMRWAG 50
#           | | | : : : : : | | : : | | : : |
B_Sequence 1 INANFRRRHIV-IGQYLGFTTIIVLASLPGF-FGGLIVPR-EWIGLL---G 44
#           2                               3
#
#           4
A_Sequence 51 ALFLLMYAAQTAARALRPGQLLVATSGPGTSLRTTLATVVALTWLNPHVY 100
#           | : : : | | : : | : | | : : : : | : | | | |
B_Sequence 45 LLPIIIGFKQLVNRKIETVQVQVTVTSFENSSYRNSTFSFL-LSLLNPHTY 93
#           4
#
#           5
A_Sequence 100 LDTVLLGTMATPYPAWGRALFAAGGSLAS-----ALWFLLIGL 139
#           | | : | | | | | | : : | : : | :
B_Sequence 94 KVAAVTLANGDNISIIY-IPLF-AGSQLASLSIILAVFFLMVGV 135
#           5
#-----
===== FINISHED =====
Average Quality (AQ)      16.11 +/- 6.25
Standard score (Z):      12.0
Precise score (Z):      12.1
```

# Fig. S3A

```
# 1: A_Sequence: Efa1 (2.A.77.1.1 homologue)
# 2: B_Sequence: Ptr2 (2.A.106.1.1 homologue)
# Matrix: EBLOSUM62
# Gap_penalty: 8.0
# Extend_penalty: 2.0

# Length: 115
# Identity:      32/115 (27.8%)
# Similarity:   57/115 (49.6%)
# Gaps:         11/115 ( 9.6%)
# Score: 108.0
#=====
                    1                               2
A_Sequence      1 LQNILSALAVYISTSI-DYLFILLIIFSQNHTKKGLRQIFFGQYLGTGIL      49
                  |::|:|:|:| | | | | | : : | |:: :||| | | ::
B_Sequence      1 WNAFTSSVAMIIATEIGDKTFFIAAVLSMKHSRSA---VFFGAILALIVM      47
                    1                               2
                    3
A_Sequence      50 VAISLFAAYVL-NFIPQDWIIIGLLGLIPIYLGIRVAF-----VGEEEEE      92
                  :| :| ||| |::: | ||: :| | :: : | : ||
B_Sequence      48 TVLSTAMGMMLPNFIPKEYTHLLGGLFLYFGCKLIYDSRQMEAGKTSEE      97
                    3
A_Sequence      93 EGEVVEKLGSRGTNR      107
                  || |:| :| :
B_Sequence      98 LEEVEEELLQQGKKK      112
#-----
===== FINISHED =====
Average Quality (AQ)      15.13 +/- 6.54
Standard score (Z):      14.0
Precise score (Z):      14.2
```

# Fig. S3B

```
# 1: A_Sequence: Cac2 (2.A.75.1.1 homologue)
# 2: B_Sequence: Mpu4 (2.A.106.1.1 homologue)
# Matrix: EBLOSUM62
# Gap_penalty: 8.0
# Extend_penalty: 2.0
```

```
# Length: 139
# Identity:      38/139 (27.3%)
# Similarity:   62/139 (44.6%)
# Gaps:         16/139 (11.5%)
# Score: 91.0
```

```
#####
1             1                               2
A_Sequence   1 LSLIVAVGPQNAMLLKYGIRRDHIGLIIVVCALSDVILITSGTAGVGYLV      50
              | |: |: |: | | | |: |: |: |: |: | |: | | | |
B_Sequence   1 LILLEIGDKTFFLAMMLAAR-HGKLVQVFLASISALFFMTLGSALAGYLV    49
              1                               2

1             3
A_Sequence   51 ----ERFPNALEALKYIGAAYLAFFTFCFRDAFKTKGEAIDVESTSPNS    96
              |   ::::: : : | | | | | | | | | | | | :
B_Sequence   50 STSAEMLHSSVKIMDWVAAVLFVLFGAQMLWDARKLHKE--DAKD-----  92
              3

A_Sequence   97 TEEVATFDGDDSTGGVGVTEHGVSATATATQRQEIKRSP      135
              ||| | | |: | : | | | | | | |: : : | |
B_Sequence   93 -EEVAALLG-GE--GARSSSHGERADAEETLREKDEKSP      127
```

```
#-----
===== FINISHED =====
Average Quality (AQ)      12.36 +/- 5.83
Standard score (Z):      13.0
Precise score (Z):      13.5
```

# Fig. S3C

```
# 1: A_Sequence: Hall (2.A.76.1.5 homologue)
# 2: B_Sequence: Cmi1 (2.A.106.1.1 homologue)
# Matrix: EBLOSUM62
# Gap_penalty: 8.0
# Extend_penalty: 2.0

# Length: 166
# Identity:      42/166 (25.3%)
# Similarity:   81/166 (48.8%)
# Gaps:        19/166 (11.4%)
# Score: 103.0
#=====
A_Sequence      1  LAVFIGDAVLIFCAYIGIASLIRSSPFLFSL-VKMLGALYLLYLGLKILY      49
   |:|:| |  :::  :|  |  |  |  |  |  |  |  |  |  |  |  |  |  |  |  |
B_Sequence      1  LSVWIGQLLMLLPKLVG-QYLPPSLGFLTHISIEYVGAVLFFFGIKLLY      49
   2                3

A_Sequence     50  S--TLAKKGQ-----EQSAAKEEPEHTFRKALTL-SLTNPKAILFYVSFF      91
   |  :::|  |  |  |  |  |  |  |  |  |  |  |  |  |  |  |  |  |
B_Sequence     50  SARNMSRKTDIEVMAEAEAEIEDGERKFKQRNTAWKIFIESGVLT TFVAEW      99
   4

A_Sequence     92  ---VQFIDMDYAHTGVSFAILAVILEMISFCYMTLLIFSGAALAHFLSEK      138
   ||  :  |  |  |  |  |  |  |  |  |  |  |  |  |  |  |  |  |
B_Sequence    100  GDRTQFATVTLAATKDSLGVMAGGIVGHAICAL-IAVIGGRAIASHISE-      147
   5

A_Sequence    139  KRLAKLGNSMVGLLEFL      154
   :  :  :|  |  |  |  |  |
B_Sequence    148  RTITIIG----GLLEFI      159
   6

#-----
===== FINISHED =====
Average Quality (AQ)      18.42 +/- 6.49
Standard score (Z):      13.0
Precise score (Z):      13.0
```

# Fig. S4A

```
# 1: A_Sequence: Kor1 (2.A.76.1.5 homologue)
# 2: B_Sequence: Cce1 (2.A.107.1.2 homologue)
# Matrix: EBLOSUM62
# Gap_penalty: 8.0
# Extend_penalty: 2.0

# Length: 105
# Identity:      26/105 (24.8%)
# Similarity:   58/105 (55.2%)
# Gaps:         9/105 ( 8.6%)
# Score: 80.0
#=====
A_Sequence      1  LYLAYLGINMLRGAWAARRRTAAQAPAQTL3SNIH4THDNV-FRHALLLSLS 49
      : || : ||| : : : | : : : | : : : | : : : | : : : | : : :
B_Sequence      1  ILLAIIGINMIKES----RNSSCEVAVDTVADVNTD3NSLSFKNMF4VLAVA 46

A_Sequence     50  NPKAALFFLSFFIPFVNPRYPHPAL5SFFILAAVMQ4TLSMCYLATLALAGD 99
      || : | : | | : | | : | | | | : : : | :
B_Sequence     47  TSIDAL-AVGITFAFLNVNI-IPAV5SF--IGIVTFTL5SMIGVRIGSVFGE 92

A_Sequence     100 KLLAK      104
      |  : :
B_Sequence     93  KFKSR      97
#-----
===== FINISHED =====
Average Quality (AQ)      11.53 +/- 4.99
Standard score (Z):      14.0
Precise score (Z):      13.7
```

# Fig. S4B

```

# 1: A_Sequence: Hku1 (2.A.77.1.5 homologue)
# 2: B_Sequence: Dvu1 (2.A.107.1.2 homologue)
# Matrix: EBLOSUM62
# Gap_penalty: 8.0
# Extend_penalty: 2.0

# Length: 137
# Identity:      41/137 (29.9%)
# Similarity:   69/137 (50.4%)
# Gaps:         16/137 (11.7%)
# Score: 110.0
#=====
A_Sequence      1  -DKWIVGLLGLIPLFIGIKFALSGEDEDETEEIREKIEQDKSKNLLWTVV      49
      | | : | | : | | : | | : | | : | | : | | : | | : | | : | | : |
B_Sequence      1  WDHWLA--FGLL-LYIGVR--MMREAFEETEENDDRC--DPTRGL--TLI      41
      | | : | | : | | : | | : | | : | | : | | : | | : | | : | | : |
A_Sequence      50 LLTIASGGDNLGVYIPYFSSLNWSKIIIVLIIIFAIGIAILCELSRSLSKI      99
      : | : | : | | : | | : | | : | | : | | : | | : | | : | | : |
B_Sequence      42 MLAVATSIDALAVGL----SLSVLGIDIVTPAIVIGVVCLLFTATGLHLG      87
      | | : | | : | | : | | : | | : | | : | | : | | : | | : | | : |
#-----
===== FINISHED =====
Average Quality (AQ)      14.66 +/- 6.04
Standard score (Z):      16.0
Precise score (Z):      15.7

```



# Fig. S4C

```

# 1: A_Sequence: Csp2 (2.A.106.1.1 homologue)
# 2: B_Sequence: Eco2 (2.A.107.1.1 homologue)
# Matrix: EBLOSUM62
# Gap_penalty: 8.0
# Extend_penalty: 2.0

# Length: 152
# Identity:      47/152 (30.9%)
# Similarity:   70/152 (46.1%)
# Gaps:         15/152 ( 9.9%)
# Score: 134.0
#=====
A_Sequence      1  AALASMTLLSVLMGQAISFLPKHYI----HWAEIALFLGFGLKLIYDASQ      46
   |  |  |  |  |  |  |  |  |  |  |  |  |  |  |  |  |  |  |  |  |  |
B_Sequence      1  AVFGSVETLTLPLIGWAIGSVAQHYIADWDHWIAFTLLLLLGLRMIYGALQ      50
   2                               3

A_Sequence      47  MPSQSQGTVIKEAAEAVDQIPQSGNR-----LTKLLARYYPQIGIWLQAFS      91
   |  |  |  |  |  |  |  |  |  |  |  |  |  |  |  |  |  |  |  |  |  |
B_Sequence      51  -PEQPAG---EQSAEAQPESGQSGRRPPSPLMLVAIAFATSIDSMIVGVG      96
                               4

A_Sequence      92  MTFLAEWGDRTQISTIALASS-YNVIGVTTGAILGHGICSVIAVIGGKLV      140
   :  |  |  |  |  |  |  |  |  |  |  |  |  |  |  |  |  |  |  |  |  |
B_Sequence      97  LAFL-EVNIILLTALAIGLATTIMAAIGLRLGSAIGKRAEILGGLVL      145
                               5                               6

A_Sequence      141  AG      142
   |
B_Sequence      146  IG      147
#-----
===== FINISHED =====
Average Quality (AQ)      22.13 +/- 7.43
Standard score (Z): 15.0
Precise score (Z): 15.1

```

# Fig. S5A

```

# 1: A_Sequence: Lbr1 (2.A.77.1.1 homologue)
# 2: B_Sequence: Sma2 (2.A.108.2.4 homologue)
# Matrix: EBLOSUM62
# Gap_penalty: 8.0
# Extend_penalty: 2.0

# Length: 207
# Identity:      55/207 (26.6%)
# Similarity:   101/207 (48.8%)
# Gaps:         31/207 (15.0%)
# Score: 138.0
#=====
                1                      2
A_Sequence    1  IDYLIILMVIFGA--TPKRHRFLVYLGDFLGTAILVLTSYLMAVILGFV-      47
                : : | : : : |           | : | | : : : | | : | | | : : | : : | | :
B_Sequence    1  VEALLIVLALIGTLKASKQKRGLKWV--YLGAALGVLASVVTAIMLQFLF      48
                2                      3                      3
A_Sequence    48  PA-----EWLLGFLGLIPIILM--GVKLLIFGEKEDDDLIENEIQKKTN      88
                ||           | | | : : : | | | : : : | : : : | : : | :
B_Sequence    49  PALTSGNNREMLEGAVGIFAVFMMIGVGVWLH-SKANISAWQNYMEKQLN      97
                4                      4
A_Sequence    89  VILK-----VAITTIATCGADNIGIYVPLFTQISPTN--IPILLVT      127
                : : :           : : : : | | : | | : | | | : | |
B_Sequence    98  LVMSTGSFVSMFALSFLAVFREGAETILFYVGILPNISLQNLLLGILAAV      147
                5                      6                      6
A_Sequence    128 FFIMMTLFCYLGYLLSKIPTIGNILE--KWSRYITAVVYIGLGIYILWES      175
                : | | | : : | | | | : : | : | | | : | : | : | :
B_Sequence    148 LILMMLAFVFI-KSSEKIP-IHRVFQLLTWTIYILAFKMLGVSIHALQLT      195
                7
A_Sequence    176 GTL-THL      181
                | | | :
B_Sequence    196 NALPTHV      202
#-----
===== FINISHED =====
Average Quality (AQ)      27.14 +/- 8.23
Standard score (Z):      13.0
Precise score (Z):      13.5

```

# Fig. S5B

```

# 1: A_Sequence: Aaul (2.A.76.1.5 homologue)
# 2: B_Sequence: Eli1 (2.A.108.2.1 homologue)
# Matrix: EBLOSUM62
# Gap_penalty: 8.0
# Extend_penalty: 2.0

# Length: 104
# Identity:      25/104 (24.0%)
# Similarity:   48/104 (46.2%)
# Gaps:         5/104 ( 4.8%)
# Score: 84.0
#=====
A_Sequence      1 KKNESALSMFQRGIWVNLLNPKAIVFFLA-FMPQFIRPDQPLLQQYAVLT 49
                  | : | | | | | : : | : : | : : : |
B_Sequence      1 KAGQDRALRFVHGGWTGALVAGALTWLAATYLLDISGAGRESIEAFGSLI 50
                  | : | | | | | : : | : : | : : : |
                  2                               3

A_Sequence      50 ATVLIIDIMVMWFFFAFAARSFQRFTHDQKGQKVLNRVFGCLFVLVGILL 99
                  | : : : : | | | : : | : | : | | : | | :
B_Sequence      51 AALVLLSVGV-WMHGKSQADNWQRYIRDKLG-KALSR--GSLWFLFGIVF 96
                  | : | | | | | : : | : : | : : | : : | :
                  4

A_Sequence      100 AVIH 103
                  | :
B_Sequence      97 LVVY 100
#-----
===== FINISHED =====
Average Quality (AQ)      11.31 +/- 5.29
Standard score (Z):      14.0
Precise score (Z):      13.7

```

# Fig. S5C

```
# 1: A_Sequence: Aan1 (2.A.106.1.1 homologue)
# 2: B_Sequence: Sso1 (2.A.108.3.3 homologue)
# Matrix: EBLOSUM62
# Gap_penalty: 8.0
# Extend_penalty: 2.0

# Length: 82
# Identity:      28/82 (34.1%)
# Similarity:   47/82 (57.3%)
# Gaps:         2/82 ( 2.4%)
# Score: 104.0
#=====
A_Sequence      1  IAAILAMKHARLVIFLGAVSSALAVMTVLSAAMGYALPALMPRTYTHYASA      50
                |||||      :  :  |  :  ||  :  ||  :  :  :  :  :  :  |  |  |  :  |  |  |||
B_Sequence      1  IAAIYHNIYKNNLPIYAVLGVAIVLIPTFTLG-KLIYLVPLNVLLASA      49
                1                2                3

A_Sequence      51  LLFFYFGCRMLKDASSMSGVSEELGEVEEE      82
                :: ||||| |::: |  |  |  :  :: ||  :  ||
B_Sequence      50  VILFYFGYRLIRSA-RRSFKGIKKKGEEKEE      80
#-----
===== FINISHED =====
Average Quality (AQ)      13.74 +/- 5.89
Standard score (Z):      15.0
Precise score (Z):      15.3
```

# Fig. S6A

```

# 1: A_Sequence: Pre2 (2.A.76.1.5 homologue)
# 2: B_Sequence: Lfr1 (2.A.109.1.3 homologue)
# Matrix: EBLOSUM62
# Gap_penalty: 8.0
# Extend_penalty: 2.0

# Length: 120
# Identity:      39/120 (32.5%)
# Similarity:   55/120 (45.8%)
# Gaps:        16/120 (13.3%)
# Score: 91.0
#=====
1                               2
A_Sequence      1 NFWTYLAGLVLIIVPGPNSLYVLKTSTS-SGTRFGYRAAL--GVFTGDG      47
                  | | : | | : : | | | : | | : |
B_Sequence      1 NDWLIIFSLVIECLLSVDNAVVLAAQTQVLP TKKQEESLFYGMW-GAY      49
                  1                               2

                               3
A_Sequence      48 ILIFLSFIGV-ASVIKASPTLFMIVRYLGAAYLLYLGCKILYSTFM--HK      94
                  | | | | : | | | | | | | | | | | | | | | | |
B_Sequence      50 IFRFL-IIGVGVYLIK-----FWIKVLGAALYLAFSFFYNMHQNRHK      93
                  3

A_Sequence      95 KSNQDGTDTISIKTENHFTR      114
                  | | : | : : | | |
B_Sequence      94 KSH---THQVKPNKKNHTR      110
#-----
===== FINISHED =====
Average Quality (AQ)      13.27 +/- 5.74
Standard score (Z):      14.0
Precise score (Z):      13.5

```

# Fig. S6B

```
# 1: A_Sequence: Osp1 (2.A.77.1.1 homologue)
# 2: B_Sequence: Bsp1 (2.A.109.1.3 homologue)
# Matrix: EBLOSUM62
# Gap_penalty: 8.0
# Extend_penalty: 2.0
```

```
# Length: 118
# Identity:      36/118 (30.5%)
# Similarity:   60/118 (50.8%)
# Gaps:        11/118 ( 9.3%)
# Score: 104.0
#=====
```

```

      1                               2
A_Sequence  1  SIDYIVIL--VVLFAQNERRKRAVRDIFLQYIGFTILIAISLLAAFGLT 48
      |||  :|  ::  : | ||:|::  | | | | | | | | | | | | | | | |
B_Sequence  1  SIDNAAMLASIMIMKLLKKEDRKKALKYGI FGAYF-FR--GISLI--FASI 44
      1                               2

      3                               4
A_Sequence  49 LIPQHWIGLL-GLVPIFIGLKVLFFEKE--DDDDQEIIIDTNRFTSFILSV 95
      ||  | : | | | | : | | : | : | : | : | : | | | | | | | | | |
B_Sequence  45 LIKIWWLKLGLGLVYIGISHFFKKKLIKNSKKNIIILRNSFWKIIISI 94
      3                               4
```

```
A_Sequence  96 AVIMLAAGGDNLGVYIPY 113
      : : | | | | : | :
B_Sequence  95 EIMDLTFSIDNIFATIAF 112
```

```
#-----
===== FINISHED =====
Average Quality (AQ)      16.41 +/- 6.46
Standard score (Z):      14.0
Precise score (Z):      13.6
```

# Fig. S6C

```

# 1: A_Sequence: Pfr1 (2.A.75.1.1 homologue)
# 2: B_Sequence: Rpa3 (2.A.109.1.5 homologue)
# Matrix: EBLOSUM62
# Gap_penalty: 8.0
# Extend_penalty: 2.0

# Length: 103
# Identity:      31/103 (30.1%)
# Similarity:    51/103 (49.5%)
# Gaps:          11/103 (10.7%)
# Score: 112.0
#=====
A_Sequence      1  YLCWFAWRSFRSALRPQSD--DALTGQGPDAGALRPIVGTTL-ALTWLNP      47
      :| | | | | | | | : :| | | | | | :| | | : :| :
B_Sequence      1  WVCWKMWRELRSQSQHDADALDALNDDGTASGAPRKTLGQAVWQITLADI      50
      3                                     4

A_Sequence      48  HVYLDTMVMLGGLANQHPGLTRWAFAGGAMLSALWFAALGLGARALSRP      97
      : | | : : | | : | | : | | | | : | | | : : :
B_Sequence      51  SMSLDNVLAVAGAAREHPII-----LVFGLALSIALMGLAASFIAKL      92
                                     5

A_Sequence      98  LSK      100
      | |
B_Sequence      93  LQK      95
#-----
===== FINISHED =====
Average Quality (AQ)      16.06 +/- 6.58
Standard score (Z):      15.0
Precise score (Z):      14.6

```

# Fig. S6D

```

# 1: A_Sequence: Lm1l (2.A.107.1.1 homologue)
# 2: B_Sequence: Ddo1 (2.A.109.5.1 homologue)
# Matrix: EBLOSUM62
# Gap_penalty: 8.0
# Extend_penalty: 2.0

# Length: 188
# Identity:      48/188 (25.5%)
# Similarity:   94/188 (50.0%)
# Gaps:        29/188 (15.4%)
# Score: 132.0
#=====

A_Sequence      2                               3                               47
1 LSQALGIGILFGV---VEATTPLIGWLLGSAASRFVASIDHWVAFVLLAG
|:  :  | :|||:  | :  | :  | |  | |  | |  | :|||

B_Sequence      2                               3                               45
1 LAMGMRIALLFGISWLVALSAPF--WHIN--ASWITGGIS-WQAVILLIAG

A_Sequence     48 LG IHMVWKS FQPLEPDCDDQTDAPYDTGVQLGADGSALRTGRLLPAGLLS 97
| | : : | | | :  | :  | | : :  :  : : : :  | : :

B_Sequence     46 GIFLIWKSVHEIHEKVD-----ETGLE--EEEISKKSSTTLGNAIVQ 85

A_Sequence     98 MLLTSVATSIDAM--AVGVTLAFVDVPIGQVALVIGLCTTMMVTLGVML- 144
: : : : | | : : | | | : | |  | | : :  : : : : | : :

B_Sequence     86 IAVINLVFSFDSILTAVGMTNGLSDNPTD--ALII-MVIAVVISVGIMML 132
4                               5

A_Sequence     145 GRL LGTLVGRR--AEM LGGIVLIVIGTVILYE--HLA 177
: | : :  : : | | | : | | : : : | | :

B_Sequence     133 FANPVGNFIAKHP SLQILGLSFLIILIGFM LIAEGAHL S 170
4                               5

#-----
===== FINISHED =====
Average Quality (AQ)      26.22 +/- 7.83
Standard score (Z):      14.0
Precise score (Z):      13.5

```



# Fig. S6E

```

# 1: A_Sequence: Npe1 (2.A.108.2.1 homologue)
# 2: B_Sequence: Cte1 (2.A.109.1.3 homologue)
# Matrix: EBLOSUM62
# Gap_penalty: 8.0
# Extend_penalty: 2.0

# Length: 202
# Identity:      57/202 (28.2%)
# Similarity:   91/202 (45.0%)
# Gaps:        19/202 ( 9.4%)
# Score: 125.0
#=====
A_Sequence      1 SSFVAAFTILVREGLEAI---LIVIAMITFLAKADRRDVLPHYVHGGGWIAA      47
  | | : | : | | | : : : | : | | | : |
B_Sequence      1 SLLVIFNLIVIEGLLSVDNAAVLATMVLDLPQKQRPAALTY---GILGA      47
  | | | | | | | | | | | | | | | | | | | | | | | | | | | |
  1 2

A_Sequence      48 -LFAGAGTWAAATWLITISGASRELTEGFGGVFAALVLLWVGIWMH-GKS      95
  | | | | | : | | : | : | | | | | | | | | | | | | | | |
B_Sequence      48 YLFRGLFLFFAA-FLV-----SAWWLRPFGGLY-LLYLVW-NWNNRGSK      89
  | | | | | | | | | | | | | | | | | | | | | | | | | | |
  3

A_Sequence      96 NADAWQRYIRD-KLGRALNRRSAWFLFALAFIVVYREVFETILFYAAIWS      144
  : | | | | | : | | : : | | | | | : : : | | | | | : | |
B_Sequence      90 DGDAMCTEKRDNRLYRFVSRRIGFWATVLFVEMMDIAFSIDNVFAAVAF      139
  | | | | | | | | | | | | | | | | | | | | | | | | | | |
  4

A_Sequence      145 QNGGAVVAGAFAAIAVLAVIAFVMLRHSRTLPIGKFFAYSSALIAVLAV      194
  | | | | | | | | | | | : : : | | | | | : | | | | | : |
B_Sequence      140 TDNLILVCTGVFIGILVMRFVAYGFIRLMEEYPFLESCAY--IVLAVLGL      187
  | | | | | | | | | | | | | | | | | | | | | | | | | | |
  5 6

A_Sequence      195 VL      196
  |
B_Sequence      188 RL      189
#-----
===== FINISHED =====
Average Quality (AQ)      22.32 +/- 7.82
Standard score (Z):      13.0
Precise score (Z):      13.1

```

# Fig. S6F

```
# 1: A_Sequence: Ptr2 (2.A.106.1.1 homologue)
# 2: B_Sequence: Lga1 (2.A.109.1.3 homologue)
# Matrix: EBLOSUM62
# Gap_penalty: 8.0
# Extend_penalty: 2.0

# Length: 194
# Identity:      53/194 (27.3%)
# Similarity:   85/194 (43.8%)
# Gaps:         31/194 (16.0%)
# Score: 111.0
#=====
A_Sequence      1 GGFWNAFTSSVAMI1IATEIGDKTFFIAA--VLSMK-HSRS2AVFFGAILA 46
| | : : | | : | | : | | | | | | : : : | :
B_Sequence      1 GQDWMMILTLILMECLLSV-DNAVVLAAQTQVLPKDEQRKSLVYG-LWG 48
| | | | | | | | | | | | | | | | | | | | | |
A_Sequence      47 LIVMTVLSTAMGMMLPNFIPKEY3THLLGGLLFLYFGCKLIYDSRQMEAGK 96
: : : | | | | | | | | | | | | | | | |
B_Sequence      49 AYLFRFIVIGIGTYLIN3FWE---IKLLGGLYLLYL3VYKYFYDVRHP---- 91
| | | | | | | | | | | | | | | | | | | | | |
A_Sequence      97 TSEELEEV4EEELLQQGKKKADLEEGSRSNRPPSKKQMGWNQVV-IQSLTL 145
: | : : : | | : | : : : | : | : | : :
B_Sequence      92 -----AQVAKK--EAAKKEAHKKKNSKTRK--HHL4SLFWRTVISIESMDI 132
| | | | | | | | | | | | | | | | | | | | | |
A_Sequence      146 TFVAEWGDRSQIATIALAA5SKNPIGVTIGGCVGHS5LC-TGLAVV 188
| : | : | | | | | | | | : | | | | | | : | |
B_Sequence      133 VFSID----SVLA--ALAMSN5NPVVVLVGGMIG-ILCMRGVAEV 169
| | | | | | | | | | | | | | | | | | | | | |
#-----
===== FINISHED =====
Average Quality (AQ)      13.76 +/- 5.99
Standard score (Z):      16.0
Precise score (Z):      16.2
```





# Fig. S7C

```

# 1: A_Sequence: Msp1 (2.A.77.1.4 homologue)
# 2: B_Sequence: Orf7 (2.A.95.1.4 homologue)
# Matrix: EBLOSUM62
# Gap_penalty: 8.0
# Extend_penalty: 2.0

# Length: 152
# Identity:      42/152 (27.6%)
# Similarity:   68/152 (44.7%)
# Gaps:         9/152 ( 5.9%)
# Score: 97.0
#=====
A_Sequence      1  FLLAAFFANPEFRAKDVVLGQYLGFIVLLT--ISSLAYFVQF--IIPSNW      46
  ||           ||: || | |           |: || | | | |           | |           |: |:
B_Sequence      1  FLAVTTGQNPQKRRRKTARKASLTAFVVLTTFAIAGTFFIFKMFGITLPAFE      50
  1           2
A_Sequence      47 ISLLGVIPIMIGIRSFHLHKK-PQTDYSGENRDFSKYKEGQMMLPVTLVT      95
  |: ||| | :| |: | | : || | : : || | : : || | : : || | : : || | : :
B_Sequence      51 IA-GGVILLLLIGL-DMLEAKRSPTQESSGETAEAS-KEDVGIVPLGIPM      97
  3           4
A_Sequence      96 LANGGDNLGVYMPLEFASMGPFDL-FLTAIIFLIMGVVWCFLGYKLVNNRV      144
  || | | | | | | | | | | | | | | | | | | | | | | | | | | | | | | | | | |
B_Sequence      98 LAGGAITSVMVLVGQAQNPWQVGTIIAAIAITAVSCYVVLGAATRVARI      147
  5
A_Sequence      145 LG      146
  ||
B_Sequence      148 LG      149
#-----
===== FINISHED =====
Average Quality (AQ)      13.03 +/- 5.85
Standard score (Z):      14.0
Precise score (Z):      14.4

```

# Fig. S7D

```

# 1: A_Sequence: Asu1(2.A.107.2.1 homologue)
# 2: B_Sequence: Csh1(2.A.95.1.5 homologue)
# Matrix: EBLOSUM62
# Gap_penalty: 8.0
# Extend_penalty: 2.0

# Length: 124
# Identity:      33/124 (26.6%)
# Similarity:   64/124 (51.6%)
# Gaps:         6/124 ( 4.8%)
# Score: 108.0
#=====
A_Sequence      1 YISEFDHWIA-FALLCVIGINMIKMSVTNENSDDDDPSD--FSL-RHITML 46
  :| |  | | :| :| :| :| :| | | :| | :| :| :| :| :| :| :|
B_Sequence      1 HLSETSLGIAGGVILFLIALRMV-FPAPHGNGADHPADEPFVVPLAIPLI 49
  :| :| :| :| :| :| :| :| :| :| :| :| :| :| :| :| :| :|
                                     3           4
A_Sequence      47 GVATSIDALAMGVSFAFILKVNITAAAIIGITTTILSL-FGVKAGHWLGD 95
  :| :| :| :| :| :| :| :| :| :| :| :| :| :| :| :| :| :|
B_Sequence      50 AGPSALATVLLLVSREPARLWEWVAALALTMVVCALTLAFAEKISHWLGE 99
  :| :| :| :| :| :| :| :| :| :| :| :| :| :| :| :| :| :|
                                     5           4
A_Sequence      96 RIHKQAELGGIILLIAMGVKVLIE 119
  | :| :| :| :| :| :| :| :| :| :| :| :| :| :| :| :| :|
B_Sequence     100 RVTTAFERLMGLVLTAIAVQMLLD 123
  :| :| :| :| :| :| :| :| :| :| :| :| :| :| :| :| :| :|
                                     6           6
#-----
===== FINISHED =====
Average Quality (AQ)      16.70 +/- 6.06
Standard score (Z):      15.0
Precise score (Z):      15.1

```

# Fig. S7E

```

# 1: A_Sequence: Gka1 (2.A.109.1.5 homologue)
# 2: B_Sequence: Dgil (2.A.95.1.5 homologue)
# Matrix: EBLOSUM62
# Gap_penalty: 8.0
# Extend_penalty: 2.0

# Length: 106
# Identity:      29/106 (27.4%)
# Similarity:   52/106 (49.1%)
# Gaps:         6/106 ( 5.7%)
# Score: 93.0
#=====
A_Sequence      1  LIIGIDVILGGDNAVVIALAS-RNLPEQKRNVAIIVGTALAIAVRIVLTV      49
| : : : | : : : | : : : | : : : | : : : | : : : | : : : | : : : |
B_Sequence      1  LAVPLFLIMDGLGNVPVCMSMLRRFPPRRQRIIFRELCFALAISILFCF      50
| : : : | : : : | : : : | : : : | : : : | : : : | : : : | : : : |
A_Sequence     50  AVVWLLTI----P-FLQLAGGVLEFWIALKLIGQKDEKPTMIKAEPSLWK      94
| | | | | | | | | | | | | | | | | | | | | | | | | | | | | | | |
B_Sequence     51  FGDWLLKFLGLGPSTLRLAGGVLEFVISMRMVFPDESKETADPEDPSALA      100
| : : : | : : : | : : : | : : : | : : : | : : : | : : : | : : : |
A_Sequence     95  AIQTIV      100
| : : : | : : : | : : : | : : : | : : : | : : : | : : : | : : : |
B_Sequence    101  AEEPFI      106
| : : : | : : : | : : : | : : : | : : : | : : : | : : : | : : : |
#-----
===== FINISHED =====
Average Quality (AQ)      12.39 +/- 5.29
Standard score (Z):      15.0
Precise score (Z):      15.2

```

# Fig. S8A

```

# 1: A_Sequence: Aur1 (2.A.76.1.2 homologue)
# 2: B_Sequence: Bcol (2.A.113.1.9 homologue)
# Matrix: EBLOSUM62
# Gap_penalty: 8.0
# Extend_penalty: 2.0

# Length: 209
# Identity:      52/209 (24.9%)
# Similarity:   93/209 (44.5%)
# Gaps:         18/209 ( 8.6%)
# Score: 128.0
#=====
A_Sequence      1  FIALITLMFIQFCALITPGPDFFLVSQTAISRSRREAVFVVLGITVGVMF 50
| |::: | |: | | : | | |:: : : | : | :
B_Sequence      1  FISVLALGFVLGIKHAIE-PDHIIAVSTIASRSKLSQSSLAGVFWGIGH 49
      1                               2

A_Sequence     51  WAILALMGLNIIFEK----MAWLKQILLVIGGIYLCWLGFOMLRSAFSKQ 96
| |::: | |: | | : | | |:: : : | | | : | | | :
B_Sequence     50  TATLFIVGICLLIIKGEIPEKWAMSLEFLV-GIMLVYLGITTLSAFKRV 97
      1                               3

A_Sequence     97  KVQNTNTPIDLPKTETKF-FLKGLLTNLSNPKAVIYFGS-VFSLEFLANPA 144
: : | | : : : : | : : : | | : | | :
B_Sequence     98  RI---NHHYHEPGHKRNYSIKSVICIGFVHGLA----GSGAMVLLTMSIV 140
      1                               4

A_Sequence    145  LDHVHSLLFIII-AVETLIWFLFVVFVFLPSFKSAYQ-NVAKWIDGVSG 192
| |::: | |: | | : | | : | | : | | : | | :
B_Sequence    141  KSVVESAIYILIFGIGTIFGMLFFTTILGIPFIISAKKVEVNKTLTQITG 190
      1                               5

A_Sequence    193  GIFTAFGIY      201
| | | | |
B_Sequence    191  AISTVFGIY      199
      1                               6

#-----
===== FINISHED =====
Average Quality (AQ)      23.09 +/- 7.61
Standard score (Z):      14.0
Precise score (Z):      13.8

```



# Fig. S8B

```

# 1: A_Sequence = Acy3 (2.A.77.1.4 homologue)
# 2: B_Sequence = Gar1 (2.A.113.1.9 homologue)
# Matrix: EBLOSUM62
# Gap_penalty: 8.0
# Extend_penalty: 2.0

# Length: 195
# Identity:      55/195 (28.2%)
# Similarity:   94/195 (48.2%)
# Gaps:         23/195 (11.8%)
# Score: 129.0
#=====
                                1                               2
A_Sequence      1 NIITPPILTGV-FAFI-ATNIDDIVILLVFFSQVNEN--FRPWQIVMQOYL      46
                  : : : ||| : | | | : : | | : | | : | : | : | : | : | : |
B_Sequence      1 DFLAAVLTGIMFGIIHAFDVDHIVAMATFSEQKNKNKQILTYAFKWGTIGH      50
                                1                               2

                                3
A_Sequence      47 GFTILVIFSLPGFFGGLILPPAWIG---LLGLIPIGIGISSLVNKEKEQ      92
                  | | | : : | | | | : : : : : | : : | | : :
B_Sequence      51 G-GILLLLGMLLIFIGFQLPNWVHYSEIMVGVLLIYLGVKLLVLLHRKG      99
                                3

                                4
A_Sequence      93 LADVPEEIIISPATSINNYSLTPQIYTVAAITVANGSDNISIIYIPLFSSIS      142
                  ||| : | | : | | : : | : : | : : | : :
B_Sequence     100 TFSVPESLDLAARSLNKHDHTP-LF----IGMLHGVAGSAPLLALLPNML      144
                                4

                                5                               6
A_Sequence     143 FNSFLLIIGLFFF--LLGVWC--YV--AYQL-THQK--KVADFFT      178
                  ||| | | | | | | : : | : : : : | | | : | |
B_Sequence     145 ETQFLLHISLFSIGCLFGMFCFGYIFGSYQVYIKQKKEKLAKAFT      189
                                5                               6

#-----
===== FINISHED =====
Average Quality (AQ)      18.67 +/- 7.32
Standard score (Z):      15.0
Precise score (Z):      15.1

```

# Fig. S8C

```

# 1: A_Sequence: Bdi1 (2.A.109.1.5 homologue)
# 2: B_Sequence: Cull1 (2.A.113.1.9 homologue)
# Matrix: EBLOSUM62
# Gap_penalty: 8.0
# Extend_penalty: 2.0

# Length: 196
# Identity:      55/196 (28.1%)
# Similarity:   83/196 (42.3%)
# Gaps:        19/196 ( 9.7%)
# Score: 117.0
#=====
A_Sequence      1 ASALGKVLMIDLVLAGDNAVAVGLAAAALPQEQRRKAIILIGLA-----AA      45
| : | : | : | : | : | : | : | : | : | : | : | : | : | : | : |
B_Sequence      1 AMGIGILLGLRHALDADHVAV--STMALEERNLLRGGWIGFCWGVGHAL      48
| : | : | : | : | : | : | : | : | : | : | : | : | : | : | : |
A_Sequence     46 VVMRIGLALIT--VQLLAIVGLLLAG--GFLLLWVCWKMWRELREQATHD      91
| : | : | : | : | : | : | : | : | : | : | : | : | : | : | : |
B_Sequence     49 VLFLFGGALILSGIRLPEVVGRWLEGGVGVMLILIALGSWRRMRRSKLHI      98
| : | : | : | : | : | : | : | : | : | : | : | : | : | : | : |
A_Sequence     92 QAEAEAEIERAMAIEHGGGPSPEEL----GLK-RKTFGAALIQIMIADLT      136
| : | : | : | : | : | : | : | : | : | : | : | : | : | : | : |
B_Sequence     99 HVH-QHDGERYHTHFVHDDSPRHLEKHHGWKGSHSFLIGTVHGLAGTGA      147
| : | : | : | : | : | : | : | : | : | : | : | : | : | : | : |
A_Sequence    137 MSLDNVLAVAGASHEHPWIMVFGL--ILSIALMGLAATFIAKLLNR      180
| : | : | : | : | : | : | : | : | : | : | : | : | : | : | : |
B_Sequence    148 VMVLTIAAVSDPLQRIAYLASFGLGTILSMTLFSLSLTLITKLLNR      193
| : | : | : | : | : | : | : | : | : | : | : | : | : | : | : |
#-----
===== FINISHED =====
Average Quality (AQ)      18.97 +/- 7.06
Standard score (Z):      14.0
Precise score (Z):      13.9

```

# Fig. S8D

```

# 1: A_Sequence: Mfo1 (2.A.95.1.4 homologue)
# 2: B_Sequence: Orf5 (2.A.113.2.1 homologue)
# Matrix: EBLOSUM62
# Gap_penalty: 8.0
# Extend_penalty: 2.0

# Length: 128
# Identity:      33/128 (25.8%)
# Similarity:   66/128 (51.6%)
# Gaps:         11/128 ( 8.6%)
# Score: 109.0
#=====

A_Sequence      1  FKIAWDLHAEMSKTKHSPREEIDMRMGSVAVVPLAIPLLAGPGAITTTI      50
      : | : ||| : : : || : | : : | | : ||||| :
B_Sequence      1  YQDAHERQHAEDIRRRFAGRE---VTTGQIILFGLTGGLIPCPGAITVLL      47
                                         4

A_Sequence      51  ILME-KAQSLANKTIVISSI--ILTMIVSGLILSASDIVVKKLKVSGINA      97
      : : : | : | : : : || ||| : || : : | : : : || :
B_Sequence      48  LCLQLKRVALGSVLVLCFSIGLALTMVASG-VIAALSVKYAERRFSGFGS      96
                                         5

A_Sequence      98  IVR---IMGLILAAISVQIIFSGAYGL      121
      : ||      | | : : : || : |
B_Sequence      97  LVRKAPYASGLVILCVGLYVALSGWHSL      124
                                         6

#-----
===== FINISHED =====
Average Quality (AQ)      18.86 +/- 6.66
Standard score (Z):      14.0
Precise score (Z):      13.5

```

# Fig. S9A

```

# 1: A_Sequence: Hgr1 (2.A.76.1.5 homologue)
# 2: B_Sequence: Ssp3 (2.A.116.1.7 homologue)
# Matrix: EBLOSUM62
# Gap_penalty: 8.0
# Extend_penalty: 2.0

# Length: 188
# Identity:      60/188 (31.9%)
# Similarity:   91/188 (48.4%)
# Gaps:        27/188 (14.4%)
# Score: 138.0
#=====
                1                               2
A_Sequence    1  IGIVLLPGPNSLFLVLSVATA-RGVVRVGYHAACGVF----LGDSILL-LFT      44
                : | :: | | : : : || | | || |           ||           | | : | : | : |
B_Sequence    1  LAITMMAGPQIMSAVILATAQRAVRVSLGFVTGVLIATSLGVAIMLGIAT      50
                1                               2

                3
A_Sequence    45 ALGAA---SLLRGYPALFMVVKYVGAAYLFWVGMNLAWSAWRKWRAAGIA      91
                || | |           :: | : : | | | |           || | | | |
B_Sequence    51 ALGGAVDFGSSGDKSSVGRVIOYVLLVALLI-----LA--ALRNWR----K      89
                3

                4
A_Sequence    92 TQLVEPTA-LAAAQSAHLLAPFQRALVISLLNPKAILFLLSFFVQFIDPA      140
                : || | | | | | | | | | | | | | | | | | | | | | | | | | |
B_Sequence    90 RETVEPPKWLHALMSADTRKAFETGLLVVLLMPSDLMVMLTVGVH-LDQG      138
                4

                5
A_Sequence    141 YDT--PAIPFLILSVIVMAFSAVYLSVLIVAGARLADA      176
                : : | : | : | : : | | | : | | | |
B_Sequence    139 HSSFVDALPFIALTTLVAA-TPLLLRVLL--GRRAASA      173
                5

#-----
===== FINISHED =====
Average Quality (AQ)      26.84 +/- 7.65
Standard score (Z):      15.0
Precise score (Z):      14.5

```

# Fig. S10A

```

# 1: A_Sequence: Btr2 (2.A.76.1.2 homologue)
# 2: B_Sequence: Cba1 (5.A.1.2.1 homologue)
# Matrix: EBLOSUM62
# Gap_penalty: 8.0
# Extend_penalty: 2.0

# Length: 196
# Identity:      52/196 (26.5%)
# Similarity:   90/196 (45.9%)
# Gaps:        24/196 (12.2%)
# Score: 134.0
#=====

A_Sequence      1  YVCRKAMADSRRNAMLGALGIALG--VGFWAVIVLFGLT--FLNHTIPNF      46
|:      :      :      :      |      |      |      |      |      |      |      |      |      |      |      |      |      |      |      |
B_Sequence      1  YITGTTLEEELQDKKLFALSRTLGFVLGFTIIFMIFGILAGFVGGQAFIRY      50
                                     2

A_Sequence     47  QFYLMLLGGSYLAYCGIKMVQVRKSVEIDENLKSQANEKSPL----W-KE      91
:      |      :      |      :      |      :      |      |      |      |      |      |      |      |      |      |
B_Sequence     51  RNVLTKIGGIIIVLFGLNMVGLLKL----EFLNKQRNVRSPKEVKNWFSS      96
                                     3

A_Sequence     92  ILGGLAINLS-NPKVVVFFSSVL--AGYVANISAFKDILAVLAILMGSTL      138
|      |      :      |      |      :      :      |      |      :      |      |      |      :      |      |      |
B_Sequence     97  ILMGMAFAAGWTPCIGPVLGTLIIYVGTATVS--KGIILLLAYSIG-LA      143
                                     4                                     5

A_Sequence    139  IWFTVAILFSQNKIRRFYAKNNR---YLDNAAGVVFILFGLKLIY      181
|      |      |      |      |      |      |      |      |      |      |      |      |      |      |      |      |
B_Sequence    144  IPFLLTALLI--NQFSKFLMKSEKVLPIVKISGVVLIIVVGLLIVF      187
                                     6

#-----

===== FINISHED =====
Average Quality (AQ)      23.74 +/- 7.86
Standard score (Z):      14.0
Precise score (Z):      14.0

```

# Fig. S10B

```
# 1: A_Sequence = Sne3 (2.A.106.1.2 homologue)
# 2: B_Sequence = Orf5 (5.A.1.2.1 homologue)
# Matrix: EBLOSUM62
# Gap_penalty: 8.0
# Extend_penalty: 2.0
```

```
# Length: 161
# Identity:      52/161 (32.3%)
# Similarity:   82/161 (50.9%)
# Gaps:        22/161 (13.7%)
# Score: 130.0
#=====
```

|            |                                                                                                                                                                                                                       |     |     |
|------------|-----------------------------------------------------------------------------------------------------------------------------------------------------------------------------------------------------------------------|-----|-----|
|            | 1                                                                                                                                                                                                                     | 2   |     |
| A_Sequence | 1 <u>LLGIILAF</u> <u>LIVDGI</u> <u>AILAG</u> <u>EWITDI</u> <u>APREL</u> <u>IKML</u> <u>SGAIFI</u> <u>-IFGLV</u> <u>TLIF</u>                                                                                           |     | 49  |
|            | :  : : :  :  :  : : :  :                                                                                                                                                                                              |     |     |
| B_Sequence | 1 <u>LVGFSV</u> <u>IFIFL</u> <u>GYSS</u> <u>SLVGT</u> <u>FFYQY</u> -- <u>QDLLR</u> <u>QI</u> <u>-GAIF</u> <u>I</u> <u>VIFGL</u> <u>MILGF</u>                                                                          |     | 47  |
|            | 2                                                                                                                                                                                                                     | 3   |     |
| A_Sequence | 50 RNKREEIK-TKYH <u>FEN-P--FYSGFI--LIFVSE</u> <u>W</u> <u>GDKTQ</u> <u>IATG</u> ---LFA                                                                                                                                | 3   | 90  |
|            | : :     :    ::  :    :        :                                                                                                                                                                                      |     |     |
| B_Sequence | 48 <u>FTP</u> <u>KFLM</u> <u>KEK</u> <u>KLQ</u> <u>FKNR</u> <u>PAGY</u> <u>FGT</u> <u>FLI</u> <u>GLA</u> <u>F</u> <u>AAG</u> <u>WT</u> <u>PCTG</u> <u>PITG</u> <u>AVFM</u> <u>MA</u>                                  |     | 97  |
|            | 4                                                                                                                                                                                                                     |     |     |
| A_Sequence | 91 TQYNG----- <u>LMVLTG</u> <u>VIIA</u> <u>LSLL</u> <u>SVIA</u> <u>IYSG</u> <u>KFIS</u> <u>DKVT</u> <u>RETL</u> <u>TKLTG</u>                                                                                          |     | 134 |
|            | : :         :         :                                                                                                                                                                                               |     |     |
| B_Sequence | 98 AQNPGS <u>GMWY</u> <u>MLVY</u> <u>VLG</u> <u>F</u> <u>AI</u> <u>PF</u> <u>LLS</u> <u>SIF</u> <u>-ITR</u> <u>VK</u> <u>WI</u> <u>-Q</u> <u>KY</u> <u>NR</u> <u>-T</u> <u>IT</u> <u>K</u> <u>V</u> <u>G</u> <u>G</u> |     | 144 |
|            | 5                                                                                                                                                                                                                     |     |     |
| A_Sequence | 135 <u>FLFIS</u> <u>M</u> <u>G</u> <u>V</u> <u>L</u> <u>FF</u>                                                                                                                                                        | 145 |     |
|            | :   : : :                                                                                                                                                                                                             |     |     |
| B_Sequence | 145 <u>YLM</u> <u>I</u> <u>A</u> <u>L</u> <u>G</u> <u>I</u> <u>L</u> <u>L</u> <u>F</u>                                                                                                                                | 155 |     |
|            | 6                                                                                                                                                                                                                     |     |     |

```
#-----
===== FINISHED =====
Average Quality (AQ)      26.20 +/- 7.85
Standard score (Z):      13.0
Precise score (Z):      13.2
```

# Fig. S10C

```

# 1: A_Sequence: Cac1 (2.A.107.2.1 homologue)
# 2: B_Sequence: Dsp2 (5.A.1.2.1 homologue)
# Matrix: EBLOSUM62
# Gap_penalty: 8.0
# Extend_penalty: 2.0

# Length: 154
# Identity:      47/154 (30.5%)
# Similarity:   79/154 (51.3%)
# Gaps:         14/154 ( 9.1%)
# Score: 146.0
#=====
A_Sequence      1  FAISFGFFQFLCTFIGAYSGFLFNTYITYVPQIIIGMIIAFVGAFM---I  47
| : | | | | | : : | | : | : : : | | : | | | |
B_Sequence      1  FILGFSIIFFALGFSASWVGSFFSEYRDLI-RMLGGVLIAVMGLFMGLI  49
                2                3

A_Sequence      48  KEGFDNKEEKL2LLNFKMYFVLGISVSIDAAVVGFT-MFNKISSNYVILGD  96
| | | | : : | : | | | | | | | : | : : |
B_Sequence      50  KPGFMMKEKRLEVGRKRWGYLGSSVIGMAFAAGWTPCVGPILVSVLALAA  99
                4

A_Sequence      97  S-----VFIGIVTLILSIIAFIISRYLKRIQLVCKYADYI---GGIILV  137
| : | | | : | | : : : | | : : | | : : | | : : |
B_Sequence     100  SNPSAGLAYITAYTLGFAIPFFIMAFFLGRTRWILKYSNSLMKAGGALMV  149
                5                6

A_Sequence      138 IFGL      141
| : | :
B_Sequence      150 VFGV      153

#-----
===== FINISHED =====
Average Quality (AQ)      28.64 +/- 7.96
Standard score (Z):      15.0
Precise score (Z):      14.7

```
