# Supplementary material for: The LysE Superfamily of Transport Proteins Involved in Cell Physiology and Pathogenesis
Source: PubMed Central journal article supplement (PMC4608589; doi:10.1371/journal.pone.0137184), 2015-10-16
Supplement: pone.0137184.s035.pdf [file pone.0137184.s035.pdf]

# Fig. S12A

# 1: A\_Sequence: Ssp2 TMS #1-3 (Q2JWH3 ; 2.A.106 homologue)

# 2: B\_Sequence: Ssp2 TMS #4-6

# Matrix: EBLOSUM62

# Gap\_penalty: 8.0

# Extend\_penalty: 2.0

#

# Length: 118

# Identity: 30/118 (25.4%)

# Similarity: 39/118 (33.1%)

# Gaps: 29/118 (24.6%)

# Score: 111.0

#

#

#=====

|            |     |                                      |               |            |                |                      |
|------------|-----|--------------------------------------|---------------|------------|----------------|----------------------|
|            |     |                                      |               | 1          | ExGD(K/R)(T/S) |                      |
| A_Sequence | 1   | -----                                | MWAGFASLLLV   | TVA        | <b>EFGDKT</b>  | FFTPILIL 28          |
|            |     |                                      |               | :          |                | :                    |
| B_Sequence | 1   | EEEEALRLVEQAEAKGAGRGGAWAVVWEAFSLTALA | <b>EFGDKT</b> | QIATVSL    |                | 50                   |
|            |     |                                      |               | 4          | ExGD(K/R)(T/S) |                      |
|            |     |                                      |               | 2          |                | 3                    |
| A_Sequence | 29  | AMRHPRRWVFLGTW                       | LALAA         | MTLLAVVAGK | VLFE           | LLPPLGVRVLSAGVFAA 78 |
|            |     |                                      | :             |            |                | :                    |
| B_Sequence | 51  | AATHPGLSVWAGATLGHGLMVGLAVVGG         | RFLAAHISERAVH | VWVGGGLFLL |                | 100                  |
|            |     |                                      |               | 5          |                | 6                    |
| A_Sequence | 79  | FGLRMLWQAYQMTPQ                      | QEK           |            |                | 96                   |
|            |     |                                      | :             |            |                |                      |
| B_Sequence | 101 | FALVTSWELLG                          | -----         |            |                | 111                  |

#-----

===== FINISHED =====

Average Quality (AQ) 19.10 +/- 6.83  
 Standard score (Z): 13.0  
 Precise score (Z): 13.5

# Fig. S12B

```
# 1: A_Sequence: Tth1 TMS #1-3 (I7M883 ; 2.A.106 homologue)
# 2: B_Sequence: Tth1 TMS #4-6
# Matrix: EBLOSUM62
# Gap_penalty: 8.0
# Extend_penalty: 2.0
#
# Length: 172
# Identity:      34/172 (19.8%)
# Similarity:   58/172 (33.7%)
# Gaps:         48/172 (27.9%)
# Score: 102.0
#
#=====
A_Sequence      1 MKVLYILIIISFLLSSINTKEPNNEKGNSSSEKSLLN1SNFDDQILQSHGSF      50
                  : | | : | : | : | | | | : : : |
B_Sequence      1 -----NDLKEKSTSDKQNNQ-ANSQENEK2KKKKKQIKGIAAPGYV      40

                  1 ExGD(K/R)(T/S) 2
A_Sequence      51 IG--SFISTSVSEIGDKTFIMTAILSSKYNRFWV3FGSVGSM4LIMTLISC      98
                  | :|:| | | | : | | :|: | : | :|:|:| : |::
B_Sequence      41 IAMQTFVSNFFGEWGDKSQISTIAISASYDFV5FVFLGT6VVGQIFCILLAL      90
                  4 ExGD(K/R)(T/S) 5

                  3
A_Sequence      99 LLGS-LTEYFIPLVYVKFISSALFLIFGLKMLYEVY4TDTV5DEDEDEAE6EEE      147
                  : | | : | : : | | : | | |
B_Sequence      91 IGGQVLAKQFSEKT-MALLGGILFIIFS6FITLYTTLNK-----      127
                  6

A_Sequence      148 VEELEKRLSKIVTKPKTETDQN      169
B_Sequence      127 -----      127

#-----
===== FINISHED =====
Average Quality (AQ)      18.33 +/- 7.38
Standard score (Z): 11.0
Precise score (Z): 11.3
```

# Fig. S12C

```

# 1: A_Sequence: Tcr1 TMS #1-3 (K4DX00 ; 2.A.106 homologue)
# 2: B_Sequence: Tcr1 TMS #4-6
# Matrix: EBLOSUM62
# Gap_penalty: 8.0
# Extend_penalty: 2.0
#
# Length: 137
# Identity:      25/137 (18.2%)
# Similarity:   47/137 (34.3%)
# Gaps:        26/137 (19.0%)
# Score: 52.0
#
#=====
A_Sequence      1  -----MAIHATRRW--TEGLLS-FSMILVSEIGDKTFFIACLAMMRH      40
                | | | | | | | | | | | | | | | | | | | | | | | |
B_Sequence      1  TGSISSTGAGCARRHWFAFHPVMAEVFALTFVAEWGDRSQLATIALAAK      50
                | | | | | | | | | | | | | | | | | | | | | | | |
                4  ExGD(K/R)(T/S)
A_Sequence      41  SKVLVFLGAIGALAGMTVLSALMGLVVPVSVLSVRVTKMLAVVLFFFGFGGK      90
                : | : | : | | : | | : | : | : | : | | | | |
B_Sequence      51  NPFAVTIGGVLGHAVCTGVAVLCGNMTARYVSMRSVNIVGGGLFIVFALA      100
                | | | | | | | | | | | | | | | | | | | | | | | |
                5  6
A_Sequence      91  ILYDEFAKRGQGDAESDDEMTEAAAIIRKKDPNDAVE      127
                ||: | | : :
B_Sequence     101  TLYELITNTHHID-EMQQQKEK-----      121

#-----

===== FINISHED =====
Average Quality (AQ)      14.58 +/- 6.61
Standard score (Z): 6.0
Precise score (Z): 5.7

```

# Fig. S13A

```

# 1: A_Sequence: Nps1 TMS #1-3 (Q8YX33 ; 2.A.108 homologue)
# 2: B_Sequence: Nps1 TMS #4-6,7
# Matrix: EBLOSUM62
# Gap_penalty: 8.0
# Extend_penalty: 2.0
#
# Length: 150
# Identity:      30/150 (20.0%)
# Similarity:   50/150 (33.3%)
# Gaps:        54/150 (36.0%)
# Score: 99.0
#
#=====
A_Sequence      1  -----MNWEIVLASFASLLIELVEILGIVIVVGRLL-AGWRNALV      38
                   ||  |:  |  |:  |:  ||:  |:  |  |:  |  |:
B_Sequence      1  EQLARDENESGWNWFAVVTTFKGALLDSVEVVAIAVVTLGAAQSQWLEAIS      50
                   4 (D/E)xxE

A_Sequence      39  GSGAGIALTLLLSLVLGKSLTLLIPVNILRIVAGVLLLLFGQKWTRSIVRY      88
                   |:  |  |:  |:  |  |:  |  |:  |  |:  |  |
B_Sequence      51  GAGFATFSLLVLAFLFRTPPLQQVPVKPMKFTAAMLLMGFGLYWLG-----      95
                   5                               6

A_Sequence      89  YAGLPKKRKGGSLE-----                          105
                   |||  :  |  |
B_Sequence      96  -AGLNVEWPG---DELAIIWPLAWGVGMAIASTIWRWRVSLDKPEEAIG      141
                   7

#-----

===== FINISHED =====
Average Quality (AQ)      20.11 +/- 7.38
Standard score (Z): 11.0
Precise score (Z): 10.7

```

# Fig. S13B

```

# 1: A_Sequence: Nps3 TMS #1-3 (K9Q6B8 ; 2.A.108 homologue)
# 2: B_Sequence: Nps3 TMS #4-6,7
# Matrix: EBLOSUM62
# Gap_penalty: 8.0
# Extend_penalty: 2.0
#
# Length: 151
# Identity:      30/151 (19.9%)
# Similarity:   47/151 (31.1%)
# Gaps:        58/151 (38.4%)
# Score: 96.0
#
#=====
A_Sequence      1 -----MNWEIFLASFVGSLELVEILGLVLI1 (D/E)xxEVGKLAG-WRNA      36
                  ||      :| |:|:: ||: | : :| | | |
B_Sequence      1 LETELANTGNQLGWNWFAIATTFKGALLDSVEVAIAVVTLGATGGKWLEA      50
                  4 (D/E)xxE
A_Sequence      37 FVGA-GSGIGLTL2LASLILGTS3SLTIIPVDILRIVAGVFL3LAFGQKWTRSI      85
                  || : || ::| : | | :|: :: | :|: || |
B_Sequence      51 AGGASAAAFGLVVVA-FLFRTPLN5QVP6IKPMKFTAAMLLMGFGIYWLSE-      98
                  5 6
A_Sequence      86 VKYYAGIPKKRKDEEDD-----      102
                  | | | |
B_Sequence      99 -----GF--KIKLPGDDWAI7WLP7IVWGCLMAVSALLLRWQVGLQPKEIV      141
                  7
A_Sequence      102 -      102
B_Sequence      142 S      142

#-----
===== FINISHED =====
Average Quality (AQ)      21.97 +/- 7.85
Standard score (Z): 9.0
Precise score (Z): 9.4

```

# Fig. S13C

```

# 1: A_Sequence: Rsp3 TMS #1-3 (J2KV33 ; 2.A.108 homologue)
# 2: B_Sequence: Rsp3 TMS #4-6,7
# Matrix: EBLOSUM62
# Gap_penalty: 8.0
# Extend_penalty: 2.0
#
# Length: 140
# Identity:      37/140 (26.4%)
# Similarity:    56/140 (40.0%)
# Gaps:          30/140 (21.4%)
# Score: 84.0
#
#
#=====
A_Sequence      1 MTTITSITSTMA--ASFLGSFVEVVEAFTIILAVGVTQSWRPAFIGTGLA      48
                  :      |:|      :| ||      |::| |      | : | |
B_Sequence      1 --SADRRADFLAGTAAAFKAVLLEGVEVVFIVVIATGARPGMLP-YAGLGAL      47
                  4 (D/E)xxE

A_Sequence      49 LSVLAVLV---LIFGPLLGLIPIDILQFTIGTLLILFGMRWLRKAI----      91
                  :: :| || | | : | | : | : | : | | | : | : |
B_Sequence      48 IACIAVLVIGLLVHKP-LSSVPENTLKFIVGLLLTAFGIFWIGEGIGTPW      96
                  5                          6

A_Sequence      92 ----LRASGFIALHDEEKAFASETDLARQ-----      117
                  | | | | | : | |
B_Sequence      97 PGEDLSLIGIFAL---LAAFSFIAVRWLRQYHHAQTTPAR      133
                  7

#-----

===== FINISHED =====
Average Quality (AQ)      22.15 +/- 7.74
Standard score (Z): 8.0
Precise score (Z): 8.0

```

# Fig. S14A

```

# 1: A_Sequence: Ceu1 TMS #1-3 (A8SU47 ; 2.A.107 homologue)
# 2: B_Sequence: Ceu1 TMS #4-6
# Matrix: EBLOSUM62
# Gap_penalty: 8.0
# Extend_penalty: 2.0
#
# Length: 98
# Identity:      22/98 (22.4%)
# Similarity:    42/98 (42.9%)
# Gaps:          8/98 ( 8.2%)
# Score: 82.0
#
#
#=====
                                1 Fully conserved D
A_Sequence      1 ---MSIVELFMLAVGLSMDAFAVSICKGLSLRDIKVKHMVIAGVWFGGFQ      47
                  ||  :|:| | | | :| | | | :  :  :  :|:| | :|
B_Sequence      1 NADMSAKVMFLLAVATSIDALAVGV--SFAFLKLTLYIIVLAVIFIGCIT    48
                                4 Fully conserved D
                                2                               3
A_Sequence      48 ALMPTLGYVLGSFFADLVSKWSHWIAFVLLLFIGGSMIKESFGGEEEV      95
                  :  |  :| | |  :  :|:| | |  :|:|  |
B_Sequence      49 FIFSAAGVKIGSIFGTKYKSKAELAGGIILILIGIKVVLDGLGIL---    93
                                5                               6

#-----

===== FINISHED =====
Average Quality (AQ)      24.98 +/- 7.01
Standard score (Z): 8.0
Precise score (Z):  8.1

```





# Fig. S14C

```

# 1: A_Sequence: Msp1 TMS #1-3 (C6JCY1 ; 2.A.107 homologue)
# 2: B_Sequence: Msp1 TMS #4-6
# Matrix: EBLOSUM62
# Gap_penalty: 8.0
# Extend_penalty: 2.0
#
# Length: 103
# Identity:      22/103 (21.4%)
# Similarity:    43/103 (41.7%)
# Gaps:          20/103 (19.4%)
# Score: 67.0
#
#=====
                                1 Fully conserved D
A_Sequence      1 -----MDIVSTLLIAVALAMDAFSVSLTKGFTLKNITLKQILWF      39
                  :|:| | | :|:| | | :| | | | :| | | :|
B_Sequence      1 FSDDLDDDEDTF SFAELILLAVATSIDAFAVGVTYA-VLKIDILIPVIII  49
                  4 Fully conserved D
                                2                               3
A_Sequence      40 GVFFGGFQSLMPILGWTLGVQLQLIVSEVAPWIAFILLVLIGANMIRE-    88
                  |: | : | :| | | :: : : : |: |: | :: |
B_Sequence      50 GLV--AF--IFTIIGIYLGKKIGDYFGDKFEILGGVILILLGCRILLEGL  95
                  5                               6

A_Sequence      88 ---      88
B_Sequence      96 GFL      98

#-----
===== FINISHED =====
Average Quality (AQ)      21.80 +/- 6.60
Standard score (Z): 7.0
Precise score (Z): 6.9

```

# Fig. S15A

```
# 1: A_Sequence: Gth1 TMS #1-3 (A4IKQ1 ; 2.A.109 homologue)
# 2: B_Sequence: Gth1 TMS #4-6,7
# Matrix: EBLOSUM62
# Gap_penalty: 8.0
# Extend_penalty: 2.0
#
# Length: 141
# Identity:      29/141 (20.6%)
# Similarity:   52/141 (36.9%)
# Gaps:        50/141 (35.5%)
# Score: 98.0
#
#=====
A_Sequence      1 MSVDLFSPEFWTALLSIVIIDLVLAGDNAIVIGLAARNLPKHQQKAVIW      50
                  | | : : | : | | : : | | : : | | | | | |
B_Sequence      1 -----GSLWEAVRTIIIADALMGLDNVLAVAGAA-----HGHFLLVIL      38
                  4 DxxxxxDN
                  2                               3
A_Sequence      51 GTVGAVVIRAM-ATIFVVWLLKIPGLLLVGLLLVWVIAYKLLVEE---KG      96
                  | : : | | : : : | : : | : | | | : : | |
B_Sequence      39 GLLISVPIMVWGSTLILKWIERFPIIITIGAGILAWTASKMIVDEPFLKG      88
                  5                               6

A_Sequence      97 H---DDIEAG----- 103
                  :   | : |
B_Sequence      89 YFANPVIKYGFELLVAAVIAIGTQKRKAAKKPHLKVANE 129
                  7

#-----

===== FINISHED =====
Average Quality (AQ)      23.59 +/- 7.93
Standard score (Z): 9.0
Precise score (Z): 9.4
```

# Fig. S15B

```

# 1: A_Sequence: Bsp2 TMS #1-3 (G8M4S7 ; 2.A.109 homologue)
# 2: B_Sequence: Bsp2 TMS #4-6,7
# Matrix: EBLOSUM62
# Gap_penalty: 8.0
# Extend_penalty: 2.0
#
# Length: 143
# Identity:      30/143 (21.0%)
# Similarity:   44/143 (30.8%)
# Gaps:         50/143 (35.0%)
# Score: 92.0
#
#
#=====
                                1 DxxxxxDN
A_Sequence      1 MLEFFSTLHWGAVVQIIVIDILLGGDNAVVIALACRNLPDRQTRGIVLG      50
                   |  |  |  |  |  |  |  |  |  |  |  |  |  |  |  |  |  |  |  |
B_Sequence      1 -----SDRLWAAVKTIVIADAVMSLDNVIAIAGAAEAADPRHRLALVIFG      45
                                4 DxxxxxDN
                                2                               3
A_Sequence      51 TLGAILLRVILIAFAVMLLD-VPFLKFVGGVLLWIGVKLMQPDHDEHHI      99
                   :  :  |  |  |  |  |  |  |  |  |  |  |  |  |  |  |  |  |  |
B_Sequence      46 LIVSIPLIVWGSTLVKLLDRFPVVVLLGAALLGWIAGGLI---IDDPFI      92
                               5                               6

A_Sequence      100 DA-----                                101
                   |
B_Sequence      93 DRWPALNTDIVGYAARVAGALFVVGWLLRRRALADGNRATG      135
                               7

#-----

===== FINISHED =====
Average Quality (AQ)      21.13 +/- 7.79
Standard score (Z): 9.0
Precise score (Z): 9.1

```

# Fig. S15C

```

# 1: A_Sequence: Pba1 TMS #1-3 (R9LI44 ; 2.A.109 homologue)
# 2: B_Sequence: Pba1 TMS #4-6,7
# Matrix: EBLOSUM62
# Gap_penalty: 8.0
# Extend_penalty: 2.0
#
# Length: 143
# Identity:      25/143 (17.5%)
# Similarity:   47/143 (32.9%)
# Gaps:        53/143 (37.1%)
# Score: 82.0
#
#
#=====
                                1 DxxxxxxDN
A_Sequence      1 MDLLSPEFWMALLSIVLIDLVLAGDNAIVIGLAARNVPQQDQKKVIVWGT      50
                  : | | : : | : : | : : | | : : | | : |
B_Sequence      1 -----NQMWAAIRTIIIADAMMGLDNVLAVAGAAHG-----DTLLVVI-GL      40
                                4 DxxxxxxDN
                                2                               3
A_Sequence      51 LGAILIRVVM TLLVVQLL-NIPGLRLAGGLALVWIAYKLLIEEK-SHEIK      98
                  :: | | : ::::| | : | | | | | ::::| | :
B_Sequence      41 AVSVPIMVWGSTMILKLTERFPIVITIGAAVLAWTASKMIVEEPLIHDWF      90
                                5                               6

A_Sequence      99 AG----- 100
                  |
B_Sequence      91 ASPWIKYGFELLVIAAVVLLGNLMKKRKARLHQAKAMPQTNGS      133
                                7

#-----

===== FINISHED =====
Average Quality (AQ)      23.22 +/- 7.53
Standard score (Z): 8.0
Precise score (Z): 7.8

```
